# Supplementary material for: Design, synthesis, and anticancer activity evaluation of irreversible allosteric inhibitors of the ubiquitin-conjugating enzyme Ube2g2
Source: Royal Society of Chemistry journal article supplement (doi:10.1039/c8md00320c), 2018-01-01

***Electronic Supplementary Information***

**Design, synthesis and anticancer activity evaluation of irreversible allosteric inhibitors of ubiquitin-conjugating enzyme Ube2g2**

**Chao Wang, Genbin Shi\*, and Xinhua Ji\***

**Macromolecular Crystallography Laboratory, National Cancer Institute, 1050 Boyles Street, Frederick, MD 20702, USA**

**Table of contents**

|                                                                                                    |           |
|----------------------------------------------------------------------------------------------------|-----------|
| <b>NCI-60 screening methodology</b>                                                                | <b>2</b>  |
| <b>Table S1</b> One-Dose (10 $\mu$ M) NCI 60 Tumor Cell Line Screen for CW2 through CW20           | <b>4</b>  |
| <b>Table S2</b> Five-Dose NCI 60 Tumor Cell Line Screen for CW3                                    | <b>5</b>  |
| <b>Fig. S1</b> The NCI 60 tumor cell line five-dose testing results of CW3                         | <b>6</b>  |
| <b>Synthesis of compounds 2 to 7 and 9 to 40</b>                                                   | <b>7</b>  |
| <b><math>^1\text{H}</math> and <math>^{13}\text{C}</math> NMR spectra of compounds 2-20, 22-40</b> | <b>16</b> |

## NCI-60 screening methodology

The human tumor cell lines are grown in RPMI 1640 medium containing 5% fetal bovine serum (FBS) and 2 mM L-glutamine. Typically, cells are inoculated into 96-well microtiter plates in 100  $\mu$ L at plating densities of 5000 to 40000 cells per well depending on the doubling time of individual cell lines. Then, the plates are incubated at 37 °C, 5% CO<sub>2</sub>, 95% air, and 100% relative humidity for 24 h before the addition of experimental drugs. After 24 h, two plates of each cell line are fixed *in situ* with trichloroacetic acid (TCA), to represent a measurement of the cell population for each cell line at the time of drug addition ( $T_z$ ). Experimental drugs are dissolved in DMSO at 400-fold the desired final maximum test concentration and stored frozen prior to use. An aliquot of frozen drug is thawed and diluted to twice the desired final maximum test concentration with complete medium containing 50  $\mu$ g ml<sup>-1</sup> gentamicin. For five-dose screen, additional four, 10-fold and three serial 1/10 dilutions are made to provide a total of five drug concentrations plus control. Aliquots of 100  $\mu$ L of these different drug dilutions are added to the appropriate microtiter wells already containing 100  $\mu$ L of medium, resulting in the required final drug concentrations (0.01, 0.1, 1, 10, and 100  $\mu$ M). After the addition of experimental drugs, the plates are incubated for an additional 48 h. The assay is terminated by the addition of cold TCA for adherent cells. Cells are fixed *in situ* by the addition of 50  $\mu$ L of cold 50% (w/v) TCA (final concentration, 10% TCA) and incubated for 1 h at 4 °C. The supernatant is removed, and the plates are washed five times with tap water and air dried. Sulforhodamine B (SRB) solution (100  $\mu$ L) at 0.4% (w/v) in 1 % acetic acid is added to each well, followed by a 10 min incubation at room temperature. After staining, the unbound dye is removed by washing five times with 1 % acetic acid and the plates are air dried. The bound stain is subsequently solubilized with 10 mM trizma base, and the absorbance is read on an automated plate reader at a wavelength of 515 nm. For suspension cells, the methodology is identical except that the assay is terminated by fixing settled cells at the bottom of the wells by adding 50  $\mu$ L of 80 % TCA (final concentration, 16 % TCA).

For one-dose screen, data are reported as a mean graph of the percent growth of treated cells and are similar in appearance to mean graphs from the five-dose assay. The number reported for the one-dose assay is growth relative to the no-drug control, and relative to  $T_z$  number of cells. This allows detection of both growth inhibition (0 - 100) and lethality (< 0). This is the same as for the five-dose assay. For example, a value of 100 means no growth

inhibition. A value of 30 means 70% growth inhibition. A value of 0 means no net growth over the course of the experiment. A value of -30 means 30% lethality. A value of -100 means all cells are dead.

For five-does screen, seven absorbance measurements of  $T_z$ , control growth (C), and test growth in the presence of drugs at five different concentrations ( $T_i$ ), will be used to calculate the percentage growth. Percentage growth inhibition is calculated as:

$$[(T_i - T_z)/(C - T_z)] \times 100 \text{ for concentrations of which } T_i \geq T_z \text{ or}$$

$$[(T_i - T_z)/T_z] \times 100 \text{ for concentrations of which } T_i < T_z.$$

Three dose response parameters are calculated for each experimental drug. Growth inhibition of 50 % (GI50) is calculated from  $[(T_i - T_z)/(C - T_z)] \times 100 = 50$ , which is the drug concentration resulting in a 50% reduction in the net protein increase (as measured by SRB staining) in control cells during the drug incubation. The drug concentration resulting in total growth inhibition (TGI) is calculated from  $T_i = T_z$ . The LC50 (concentration of drug resulting in a 50% reduction in the measured protein at the end of the drug treatment as compared to that at the beginning) indicating a net loss of cells following treatment is calculated from  $[(T_i - T_z)/T_z] \times 100 = -50$ . Values are calculated for each of these three parameters if the level of activity is reached; however, if the effect is not reached or is exceeded, the value for that parameter is expressed as greater or less than the maximum or minimum concentration tested.

For additional information, see [https://dtp.cancer.gov/discovery\\_development/nci-60/methodology.htm](https://dtp.cancer.gov/discovery_development/nci-60/methodology.htm).

**Table S1** One-Dose (10  $\mu$ M) NCI 60 Tumor Cell Line Screen for CW2 through CW20

| Panel/Cell Line | Growth Percent |        |       |        |        |        |        |        |        |        |        |        |        |        |        |        |        |        |        |  |
|-----------------|----------------|--------|-------|--------|--------|--------|--------|--------|--------|--------|--------|--------|--------|--------|--------|--------|--------|--------|--------|--|
|                 | CW2            | CW3    | CW4   | CW5    | CW6    | CW7    | CW8    | CW9    | CW10   | CW11   | CW12   | CW13   | CW14   | CW15   | CW16   | CW17   | CW18   | CW19   | CW20   |  |
| Leukemia        |                |        |       |        |        |        |        |        |        |        |        |        |        |        |        |        |        |        |        |  |
| CCRF-CEM        | 125.67         | 17.19  | 57.86 | 90.58  | 88.12  | 88.44  | 95.11  | 80.20  | 53.71  | 103.17 | 108.71 | 79.27  | 74.44  | 95.37  | 102.20 | 104.66 | 104.10 | 105.20 | 109.19 |  |
| HL-60(TB)       | 96.71          | -27.39 | 50.50 | 81.58  | 88.98  | 86.59  | 96.53  | 108.83 | 96.96  | 101.21 | 93.96  | 76.45  | 63.68  | 100.09 | 100.88 | 98.00  | 90.91  | 95.86  | 87.88  |  |
| K-562           | 115.73         | 8.57   | 49.28 | 85.50  | 84.99  | 80.72  | 86.08  | 85.00  | 100.14 | 105.99 | 99.27  | 89.43  | 74.01  | 97.03  | 96.74  | 101.64 | 90.02  | 100.59 | 93.28  |  |
| MOLT-4          | 117.42         | 1.95   | 44.82 | 71.88  | 72.22  | 65.54  | 81.53  | 101.99 | 109.26 | 83.39  | 84.40  | 74.32  | 56.46  | 99.57  | 91.24  | 98.54  | 97.68  | 93.30  | 87.96  |  |
| RPMI-8226       | 111.95         | -2.44  | 43.18 | 76.33  | 76.07  | 82.41  | 83.69  | 82.65  | 97.03  | 100.21 | 98.21  | 73.80  | 56.26  | 98.10  | 96.60  | 104.09 | 102.41 | 104.55 | 104.84 |  |
| SR              | 110.68         | 7.26   | 42.85 | 77.29  | 71.85  | 77.90  | 79.36  | 81.59  | 110.46 | 84.72  | 90.59  | 68.67  | 56.30  | 90.49  | 82.01  | 95.60  | 94.06  | 92.83  | 91.87  |  |
| Non-Small       |                |        |       |        |        |        |        |        |        |        |        |        |        |        |        |        |        |        |        |  |
| A549/ATCC       | 95.42          | 11.55  | 56.89 | 74.21  | 72.34  | 88.24  | 76.53  | 72.02  | 69.15  | 76.48  | 56.31  | 76.42  | 69.53  | 84.57  | 76.90  | 84.79  | 75.87  | 78.98  | 79.23  |  |
| EKVX            | 90.39          | 19.96  | 67.64 | 101.60 | 89.64  | 94.23  | 90.32  | 90.04  | 97.90  | 84.36  | 91.14  | 90.98  | 80.85  | 97.29  | 95.90  | 98.05  | 94.18  | 93.04  | 98.48  |  |
| HOP-62          | 98.19          | 35.97  | 70.18 | 83.12  | 74.28  | 81.24  | 83.22  | 87.33  | 85.61  | 72.45  | 65.59  | 88.38  | 76.45  | 87.30  | 82.01  | 86.88  | 81.93  | 79.04  | 71.41  |  |
| HOP-92          | 123.49         | 14.82  | 63.17 | 78.05  | 81.51  | 76.33  | 84.28  | 84.44  | 87.57  | 79.37  | 94.97  | 73.73  | 72.28  | 93.58  | 96.42  | 93.77  | 96.54  | 93.87  | 96.86  |  |
| NCI-H226        | 86.78          | 10.84  | 50.31 | 61.32  | 75.09  | 71.48  | 91.61  | 71.35  | 76.52  | 58.79  | 82.18  | 68.91  | 67.90  | 88.35  | 86.19  | 82.50  | 82.89  | 84.91  | 99.23  |  |
| NCI-H23         | 95.45          | 15.61  | 62.01 | 81.26  | 83.08  | 91.40  | 93.61  | 93.58  | 89.56  | 85.18  | 90.66  | 76.10  | 68.04  | 95.31  | 92.74  | 94.90  | 92.50  | 99.88  | 92.80  |  |
| NCI-H322M       | 92.81          | 58.87  | 84.47 | 95.94  | 83.27  | 92.42  | 96.75  | 100.25 | 98.34  | 80.67  | 74.67  | 92.85  | 93.94  | 98.88  | 101.29 | 96.97  | 92.72  | 104.57 | 93.52  |  |
| NCI-H460        | 100.39         | 9.25   | 60.03 | 85.85  | 80.51  | 91.81  | 90.12  | 94.94  | 99.93  | 99.67  | 100.50 | 98.66  | 95.10  | 104.69 | 99.56  | 104.44 | 106.46 | 104.96 | 102.33 |  |
| NCI-H522        | 103.87         | 3.13   | 45.30 | 66.74  | 57.45  | 77.15  | 73.30  | 59.06  | 79.56  | 58.90  | 58.18  | 51.11  | 45.82  | 63.61  | 70.71  | 72.27  | 61.67  | 67.67  | 74.76  |  |
| Colon Cancer    |                |        |       |        |        |        |        |        |        |        |        |        |        |        |        |        |        |        |        |  |
| COLO 205        | 107.62         | 6.63   | 62.66 | 96.32  | 98.27  | 92.19  | 102.14 | 91.89  | 97.95  | 98.31  | NG     | 95.79  | 83.01  | 100.87 | 95.73  | 106.47 | 102.08 | NG     | 96.81  |  |
| HCC-2998        | 102.42         | 41.57  | 92.88 | 98.76  | 94.29  | 96.68  | 102.48 | 108.52 | 104.20 | 97.63  | 86.28  | 94.64  | 100.53 | 96.87  | 101.18 | 97.11  | 82.63  | 87.28  | 78.31  |  |
| HCT-116         | 88.25          | 11.07  | 44.97 | 63.94  | 68.78  | 79.15  | 62.06  | 75.51  | 91.81  | 87.41  | 74.13  | 72.07  | 57.45  | 98.43  | 82.48  | 92.21  | 75.21  | 91.51  | 73.38  |  |
| HCT-15          | 95.42          | 15.15  | 64.22 | 83.89  | 89.58  | 95.60  | 94.91  | 96.00  | 104.46 | 96.34  | 98.18  | 79.22  | 79.62  | 97.92  | 98.08  | 115.54 | 94.75  | 104.05 | 101.48 |  |
| HT29            | 93.30          | 20.30  | 56.31 | 82.16  | 81.31  | 82.81  | 74.14  | 81.46  | 88.33  | 80.43  | 78.95  | 86.87  | 76.46  | 88.24  | 97.78  | 89.11  | 84.46  | 87.86  | 92.43  |  |
| KM12            | 96.83          | 24.16  | 70.80 | 93.14  | 87.47  | 100.29 | 98.92  | 99.33  | 100.31 | 93.52  | 89.23  | 89.83  | 78.00  | 103.46 | 98.53  | 101.48 | 95.68  | 101.65 | 103.30 |  |
| SW-620          | 94.53          | 11.74  | 70.93 | 95.25  | 92.39  | 94.19  | 93.86  | 98.08  | 104.50 | 101.06 | 103.77 | 91.66  | 76.66  | 107.73 | 103.92 | 102.83 | 105.97 | 100.79 | 107.95 |  |
| CNS Cancer      |                |        |       |        |        |        |        |        |        |        |        |        |        |        |        |        |        |        |        |  |
| SF-268          | 98.20          | 32.07  | 70.31 | 84.52  | 87.79  | 97.04  | 94.21  | 102.17 | 94.59  | 83.00  | 86.42  | 84.66  | 81.88  | 100.50 | 98.71  | 92.68  | 94.00  | 100.55 | 96.36  |  |
| SF-295          | 93.58          | 21.84  | 55.88 | 85.55  | 76.72  | 95.58  | 90.00  | 82.80  | 100.41 | 85.97  | 91.51  | 83.13  | 66.55  | 98.30  | 100.59 | 102.94 | 90.56  | 100.07 | 97.26  |  |
| SF-539          | 88.70          | 56.77  | 87.33 | 96.45  | 98.32  | 96.72  | 97.91  | 99.58  | 94.57  | 98.12  | 100.48 | 99.89  | 94.24  | 96.27  | 94.58  | 99.00  | 98.16  | 94.86  | 96.42  |  |
| SNB-19          | 102.23         | 33.94  | 90.31 | 104.43 | 97.66  | 99.37  | 98.09  | 99.54  | 97.71  | 87.47  | 102.04 | 91.14  | 86.80  | 88.71  | 97.90  | 104.79 | 93.82  | 98.08  | 105.37 |  |
| SNB-75          | 74.14          | 40.30  | 81.45 | 89.65  | 101.47 | 85.25  | 82.60  | 86.98  | 92.31  | 82.77  | 90.87  | 82.53  | 90.32  | 86.07  | 87.01  | 92.04  | 85.49  | 103.82 | 86.62  |  |
| U251            | 102.56         | 20.19  | 58.24 | 79.59  | 76.17  | 88.82  | 85.83  | 80.20  | 85.74  | 79.24  | 82.05  | 78.99  | 70.81  | 93.17  | 82.99  | 91.84  | 95.12  | 92.08  | 94.34  |  |
| Melanoma        |                |        |       |        |        |        |        |        |        |        |        |        |        |        |        |        |        |        |        |  |
| LOX IMVI        | 96.59          | 36.58  | 68.43 | 90.21  | 81.09  | 86.10  | 93.40  | 95.59  | 98.13  | 86.58  | 92.51  | 86.68  | 75.43  | 100.52 | 96.93  | 95.11  | 97.85  | 98.43  | 98.28  |  |
| MALME-3M        | 76.70          | 4.14   | 82.34 | 86.90  | 103.22 | 89.24  | 87.39  | 90.08  | 103.26 | 99.44  | 89.12  | 87.58  | 72.13  | 98.58  | 99.95  | 98.53  | 94.28  | 96.60  | 96.89  |  |
| M14             | 99.48          | 24.67  | 69.68 | 96.95  | 88.68  | 91.09  | 89.02  | 86.31  | 96.58  | 91.69  | 100.36 | 88.66  | 79.71  | 95.65  | 92.25  | 104.82 | 97.73  | 99.44  | 97.48  |  |
| MDA-MB-435      | 97.18          | 1.71   | 58.63 | 95.44  | 93.49  | 100.47 | 94.26  | 101.97 | 112.70 | 102.37 | 104.21 | 96.11  | 81.73  | 102.71 | 102.71 | 108.02 | 103.14 | 101.62 | 109.29 |  |
| SK-MEL-2        | 112.53         | 14.05  | 67.42 | 91.70  | 83.32  | 96.16  | 95.75  | 90.00  | 102.35 | 94.80  | 96.86  | 90.38  | 80.74  | 91.27  | 101.09 | 98.27  | 94.16  | 96.96  | 104.78 |  |
| SK-MEL-28       | 100.75         | 39.85  | 84.57 | 98.56  | 98.33  | 108.12 | 105.97 | 106.23 | 107.25 | 102.99 | 109.13 | 113.15 | 101.35 | 109.36 | 111.97 | 107.58 | 107.56 | 107.24 | 107.24 |  |
| SK-MEL-5        | 104.37         | -88.19 | 35.93 | 71.84  | 71.81  | 86.22  | 96.50  | 91.57  | 101.31 | 91.38  | 96.39  | 72.76  | 64.37  | 99.35  | 95.68  | 99.46  | 96.78  | 99.33  | 97.71  |  |
| UACC-257        | 112.84         | -2.68  | 62.28 | 82.50  | 87.36  | 91.79  | 90.68  | 74.41  | 75.85  | 94.13  | 86.41  | 75.46  | 68.92  | 87.74  | 89.51  | 86.45  | 89.11  | 80.56  | 93.98  |  |
| UACC-62         | 89.67          | 9.00   | 48.87 | 66.68  | 60.36  | NG     | NG     | NG     | NG     | 74.71  | 75.53  | 60.94  | 51.06  | 88.75  | 86.77  | 98.51  | 87.76  | 89.26  | 93.54  |  |
| Ovarian Cancer  |                |        |       |        |        |        |        |        |        |        |        |        |        |        |        |        |        |        |        |  |
| IGROV1          | 96.58          | 36.16  | 76.00 | 92.07  | 98.67  | 97.38  | 97.84  | 96.72  | 105.35 | 94.21  | 92.63  | 93.00  | 87.58  | 107.37 | 114.48 | 106.97 | 104.46 | 104.81 | 107.37 |  |
| OVCA-3          | 99.92          | 13.53  | 49.09 | 80.76  | 83.17  | 101.54 | 98.21  | 101.46 | 103.00 | 88.34  | 97.63  | 89.55  | 77.95  | 115.33 | 108.15 | 110.01 | 102.08 | 114.19 | 111.97 |  |
| OVCA-4          | 98.92          | 10.73  | 43.29 | 75.52  | 74.43  | 94.19  | 87.08  | 96.87  | 107.51 | 91.21  | 88.09  | 83.55  | 63.08  | 100.32 | 98.57  | 100.93 | 99.61  | 99.87  | 106.36 |  |
| OVCA-5          | 83.93          | 55.85  | 91.52 | 96.68  | 94.39  | 98.64  | 94.23  | 95.96  | 90.89  | 75.43  | 79.11  | 95.49  | 97.11  | 100.62 | 92.01  | 94.73  | 86.65  | 86.78  | 83.35  |  |
| OVCA-8          | 105.68         | 16.82  | 60.04 | 67.11  | 81.67  | 92.80  | 97.24  | 90.89  | 83.49  | 85.05  | 86.99  | 76.62  | 79.85  | 95.12  | 92.69  | 99.72  | 97.09  | 85.85  | 98.49  |  |
| NCI/ADR-RES     | 101.56         | 8.70   | 64.54 | 82.99  | 89.17  | 97.43  | 98.59  | 100.93 | 92.45  | 84.05  | 85.49  | 81.78  | 80.41  | 83.36  | 106.54 | 96.90  | 98.29  | 95.63  | 106.76 |  |
| SK-OV-3         | 106.97         | 26.74  | 62.60 | 93.88  | 92.29  | 75.65  | 81.91  | 78.63  | 97.11  | 91.73  | 103.51 | 94.61  | 80.06  | 88.42  | 87.31  | 95.96  | 92.25  | 91.61  | 86.08  |  |
| Renal Cancer    |                |        |       |        |        |        |        |        |        |        |        |        |        |        |        |        |        |        |        |  |
| 786-0           | 106.27         | 11.83  | 83.25 | 99.47  | 90.01  | 99.71  | 93.85  | 92.22  | 94.26  | 102.03 | 96.96  | 96.03  | 94.31  | 102.88 | 98.37  | 105.65 | 104.86 | 98.63  | 95.55  |  |
| A498            | 68.48          | NG     | NG    | NG     | NG     | 65.29  | 64.34  | 80.63  | 85.49  | NG     |  |
| ACHN            | 98.36          | 26.73  | 75.88 | 92.75  | 89.56  | 101.48 | 101.22 | 101.26 | 99.52  | 91.53  | 97.43  | 90.11  | 89.39  | 103.59 | 101.65 | 104.78 | 99.75  | 100.14 | 103.03 |  |
| CAKI-1          | 90.78          | 35.90  | 69.69 | 88.39  | 82.23  | 84.74  | 80.58  | 84.01  | 90.54  | 83.78  | 85.69  | 79.38  | 70.80  | 91.41  | 86.27  | 92.48  | 90.56  | 91.57  | 95.37  |  |
| RXF 393         | 101.76         | -10.14 | 47.97 | 83.30  | 80.55  | 81.35  | 96.22  | 100.81 | 101.03 | NG     |  |
| SN12C           | 106.47         | 3.95   | 80.31 | 86.15  | 82.27  | 94.48  | 92.40  | 98.46  | 94.86  | 82.61  | 99.00  | 88.61  | 85.52  | 96.32  | 100.45 | 98.33  | 94.98  | 95.73  | 106.27 |  |
| TK-10           | 82.18          | 6.04   | 63.66 | 80.76  | 73.40  | 69.99  | 67.34  | 81.70  | 91.36  | 71.83  | 84.50  | 89.10  | 74.22  | 99.53  | 103.73 | 82.87  | 85.09  | 99.32  | 90.96  |  |
| UO-31           | 74.81          | 14.16  | 46.73 | 67.06  | 69.02  | 76.42  | 79.15  | 86.79  | 84.81  | 60.85  | 67.16  | 56.73  | 60.08  | 92.83  | 80.97  | 83.86  | 80.30  | 84.04  | 86.10  |  |
| Prostate Cancer |                |        |       |        |        |        |        |        |        |        |        |        |        |        |        |        |        |        |        |  |
| PC-3            | 94.57          | 16.90  | 38.45 | 73.15  | 63.68  | 66.09  | 67.27  | 63.88  | 80.30  | 78.02  | 64.84  | 60.71  | 53.55  | 87.38  | 80.65  | 87.50  | 66.47  | 89.40  | 71.96  |  |
| DU-145          | 102.67         | 16.94  | 68.83 | 79.06  | 85.49  | 101.48 | 96.57  | 101.74 | 103.83 | 94.24  | 96.17  | 91.15  | 91.85  | 106.13 | 106.12 | 107.04 | 97.57  | 109.26 | 101.35 |  |
| Breast Cancer   |                |        |       |        |        |        |        |        |        |        |        |        |        |        |        |        |        |        |        |  |
| MCF7            | 87.93          | 4.06   | 48.33 | 77.00  | 77.74  | 88.92  | 89.66  | 87.01  | 103.44 | 87.11  | 94.04  | 82.84  | 77.01  | 92.33  | 92.75  | 96.36  | 94.73  | 93.51  | 99.27  |  |
| MDA-MB-231/ATCC | 93.98          | 9.36   | 57.07 | 86.11  | 84.44  | 95.91  | 94.00  | 98.85  | 99.02  | 89.49  | 90.25  | 72.86  | 68.49  | 93.13  | 97.91  | 105.95 | 95.95  | 103.79 | 104.01 |  |
| HS 578T         | 102.           |        |       |        |        |        |        |        |        |        |        |        |        |        |        |        |        |        |        |  |

**Table S2** Five-Dose NCI 60 Tumor Cell Line Screen for CW3

| Log10 Concentration        |       |                        |       |       |       |       |       |                |      |      |      |      |         |           |           |      |
|----------------------------|-------|------------------------|-------|-------|-------|-------|-------|----------------|------|------|------|------|---------|-----------|-----------|------|
| Panel/Cell Line            | Time  | Mean Optical Densities |       |       |       |       |       | Percent Growth |      |      |      |      |         | GI50      | TGI       | LC50 |
|                            | Zero  | Ctrl                   | -8.0  | -7.0  | -6.0  | -5.0  | -4.0  | -8.0           | -7.0 | -6.0 | -5.0 | -4.0 |         |           |           |      |
| Leukemia                   |       |                        |       |       |       |       |       |                |      |      |      |      |         |           |           |      |
| HL-60(TB)                  | 1.008 | 3.270                  | 3.117 | 3.173 | 3.026 | 2.057 | 0.875 | 93             | 96   | 89   | 46   | -13  | 8.22E-6 | 6.00E-5   | > 1.00E-4 |      |
| K-562                      | 0.553 | 2.872                  | 2.900 | 2.944 | 3.126 | 1.990 | 0.582 | 101            | 103  | 111  | 62   | 1    | 1.57E-5 | > 1.00E-4 | > 1.00E-4 |      |
| MOLT-4                     | 0.806 | 3.150                  | 3.019 | 2.968 | 2.878 | 1.824 | 0.855 | 94             | 92   | 88   | 43   | 2    | 7.14E-6 | > 1.00E-4 | > 1.00E-4 |      |
| SR                         | 0.391 | 1.985                  | 1.925 | 1.766 | 1.728 | 1.009 | 0.310 | 96             | 86   | 84   | 39   | -21  | 5.63E-6 | 4.48E-5   | > 1.00E-4 |      |
| Non-Small Cell Lung Cancer |       |                        |       |       |       |       |       |                |      |      |      |      |         |           |           |      |
| A549(ATCC                  | 0.566 | 1.810                  | 1.710 | 1.740 | 1.800 | 1.393 | 0.569 | 92             | 94   | 99   | 66   | .    | 1.77E-5 | > 1.00E-4 | > 1.00E-4 |      |
| EKVX                       | 0.686 | 2.300                  | 2.162 | 2.130 | 2.154 | 1.535 | 0.701 | 91             | 89   | 91   | 53   | 1    | 1.12E-5 | > 1.00E-4 | > 1.00E-4 |      |
| NCI-H226                   | 1.510 | 2.656                  | 2.477 | 2.436 | 2.381 | 2.284 | 1.338 | 84             | 81   | 76   | 68   | -11  | 1.67E-5 | 7.17E-5   | > 1.00E-4 |      |
| NCI-H23                    | 0.602 | 1.970                  | 1.861 | 1.872 | 1.778 | 1.336 | 0.623 | 92             | 93   | 86   | 54   | 1    | 1.18E-5 | > 1.00E-4 | > 1.00E-4 |      |
| NCI-H460                   | 0.319 | 3.067                  | 3.068 | 3.046 | 2.829 | 1.842 | 0.154 | 100            | 99   | 91   | 55   | -52  | 1.12E-5 | 3.28E-5   | 9.60E-5   |      |
| NCI-H522                   | 0.897 | 1.995                  | 1.900 | 1.894 | 1.827 | 1.395 | 0.279 | 91             | 91   | 85   | 45   | -69  | 7.60E-6 | 2.49E-5   | 6.83E-5   |      |
| Colon Cancer               |       |                        |       |       |       |       |       |                |      |      |      |      |         |           |           |      |
| COLO 205                   | 0.431 | 1.540                  | 1.564 | 1.480 | 1.496 | 1.156 | 0.328 | 102            | 95   | 96   | 65   | -24  | 1.48E-5 | 5.38E-5   | > 1.00E-4 |      |
| HCC-2998                   | 0.850 | 2.280                  | 2.225 | 2.230 | 2.331 | 2.026 | 0.630 | 96             | 97   | 104  | 82   | -26  | 1.99E-5 | 5.76E-5   | > 1.00E-4 |      |
| HCT-116                    | 0.268 | 2.359                  | 2.262 | 2.259 | 2.251 | 0.956 | 0.191 | 95             | 95   | 95   | 33   | -29  | 5.29E-6 | 3.42E-5   | > 1.00E-4 |      |
| HCT-15                     | 0.293 | 2.007                  | 1.980 | 1.898 | 1.870 | 1.074 | 0.307 | 98             | 94   | 92   | 46   | 1    | 8.01E-6 | > 1.00E-4 | > 1.00E-4 |      |
| HT29                       | 0.363 | 1.840                  | 1.821 | 1.802 | 1.891 | 1.258 | 0.230 | 99             | 97   | 103  | 61   | -37  | 1.28E-5 | 4.19E-5   | > 1.00E-4 |      |
| KM12                       | 0.428 | 1.936                  | 1.920 | 1.971 | 1.891 | 1.405 | 0.420 | 99             | 102  | 97   | 65   | -2   | 1.66E-5 | 9.37E-5   | > 1.00E-4 |      |
| SW-620                     | 0.320 | 2.009                  | 1.975 | 1.883 | 1.879 | 1.447 | 0.302 | 98             | 93   | 92   | 67   | -6   | 1.70E-5 | 8.32E-5   | > 1.00E-4 |      |
| CNS Cancer                 |       |                        |       |       |       |       |       |                |      |      |      |      |         |           |           |      |
| SF-268                     | 0.632 | 1.962                  | 1.914 | 1.914 | 1.821 | 1.463 | 0.647 | 96             | 96   | 89   | 62   | 1    | 1.60E-5 | > 1.00E-4 | > 1.00E-4 |      |
| SF-295                     | 0.740 | 2.193                  | 2.084 | 2.013 | 2.060 | 1.586 | 0.704 | 92             | 88   | 91   | 58   | -5   | 1.35E-5 | 8.35E-5   | > 1.00E-4 |      |
| SF-539                     | 0.680 | 2.310                  | 2.302 | 2.257 | 2.259 | 1.973 | 0.309 | 99             | 97   | 97   | 79   | -55  | 1.66E-5 | 3.91E-5   | 9.25E-5   |      |
| SNB-19                     | 0.708 | 2.181                  | 2.110 | 2.119 | 2.058 | 1.641 | 0.737 | 95             | 96   | 92   | 63   | 2    | 1.65E-5 | > 1.00E-4 | > 1.00E-4 |      |
| SNB-75                     | 0.806 | 1.781                  | 1.728 | 1.654 | 1.594 | 1.314 | 0.729 | 95             | 87   | 81   | 52   | -10  | 1.08E-5 | 7.00E-5   | > 1.00E-4 |      |
| U251                       | 0.397 | 1.825                  | 1.763 | 1.750 | 1.756 | 1.302 | 0.495 | 96             | 95   | 95   | 63   | 7    | 1.72E-5 | > 1.00E-4 | > 1.00E-4 |      |
| Melanoma                   |       |                        |       |       |       |       |       |                |      |      |      |      |         |           |           |      |
| LOX IMVI                   | 0.429 | 2.675                  | 2.585 | 2.539 | 2.449 | 1.981 | 0.188 | 96             | 94   | 90   | 69   | -56  | 1.42E-5 | 3.56E-5   | 8.91E-5   |      |
| MALME-3M                   | 0.752 | 1.300                  | 1.257 | 1.228 | 1.206 | 1.046 | 0.398 | 92             | 87   | 83   | 54   | -47  | 1.09E-5 | 3.41E-5   | > 1.00E-4 |      |
| M14                        | 0.544 | 2.165                  | 2.190 | 2.256 | 2.075 | 1.629 | 0.507 | 102            | 106  | 94   | 67   | -7   | 1.70E-5 | 8.07E-5   | > 1.00E-4 |      |
| MDA-MB-435                 | 0.438 | 2.140                  | 2.130 | 2.027 | 2.064 | 1.234 | 0.350 | 99             | 93   | 96   | 47   | -20  | 8.58E-6 | 5.01E-5   | > 1.00E-4 |      |
| SK-MEL-2                   | 1.045 | 2.444                  | 2.363 | 2.337 | 2.389 | 2.143 | 0.459 | 94             | 92   | 96   | 78   | -56  | 1.63E-5 | 3.83E-5   | 9.01E-5   |      |
| SK-MEL-28                  | 0.790 | 2.327                  | 2.300 | 2.331 | 2.270 | 1.866 | 0.730 | 98             | 100  | 96   | 70   | -8   | 1.81E-5 | 7.98E-5   | > 1.00E-4 |      |
| SK-MEL-5                   | 0.268 | 1.570                  | 1.485 | 1.527 | 1.412 | 0.653 | 0.020 | 93             | 97   | 88   | 30   | -93  | 4.46E-6 | 1.75E-5   | 4.48E-5   |      |
| UACC-257                   | 0.798 | 1.553                  | 1.452 | 1.512 | 1.530 | 1.300 | 0.643 | 87             | 95   | 97   | 66   | -19  | 1.55E-5 | 5.93E-5   | > 1.00E-4 |      |
| UACC-62                    | 0.762 | 2.569                  | 2.357 | 2.415 | 2.091 | 1.449 | 0.332 | 88             | 91   | 74   | 38   | -56  | 4.60E-6 | 2.52E-5   | 8.54E-5   |      |
| Ovarian Cancer             |       |                        |       |       |       |       |       |                |      |      |      |      |         |           |           |      |
| IGROV1                     | 0.651 | 2.208                  | 2.134 | 2.173 | 2.044 | 1.509 | 0.760 | 95             | 98   | 89   | 55   | 7    | 1.28E-5 | > 1.00E-4 | > 1.00E-4 |      |
| OVCAR-3                    | 0.513 | 1.681                  | 1.700 | 1.678 | 1.575 | 1.020 | 0.429 | 102            | 100  | 91   | 43   | -16  | 7.27E-6 | 5.31E-5   | > 1.00E-4 |      |
| OVCAR-4                    | 0.896 | 2.139                  | 2.151 | 2.081 | 1.973 | 1.339 | 0.849 | 101            | 95   | 87   | 36   | -5   | 5.22E-6 | 7.44E-5   | > 1.00E-4 |      |
| OVCAR-5                    | 0.643 | 1.623                  | 1.547 | 1.541 | 1.473 | 1.307 | 0.788 | 92             | 92   | 85   | 68   | 15   | 2.16E-5 | > 1.00E-4 | > 1.00E-4 |      |
| OVCAR-8                    | 0.475 | 1.892                  | 1.803 | 1.779 | 1.782 | 1.151 | 0.520 | 94             | 92   | 92   | 48   | 3    | 8.89E-6 | > 1.00E-4 | > 1.00E-4 |      |
| NCI/ADR-RES                | 0.399 | 1.494                  | 1.503 | 1.457 | 1.381 | 0.998 | 0.365 | 101            | 97   | 90   | 55   | -9   | 1.19E-5 | 7.33E-5   | > 1.00E-4 |      |
| SK-OV-3                    | 0.996 | 2.123                  | 2.112 | 2.140 | 2.163 | 1.877 | 0.802 | 99             | 101  | 104  | 78   | -20  | 1.94E-5 | 6.31E-5   | > 1.00E-4 |      |
| Renal Cancer               |       |                        |       |       |       |       |       |                |      |      |      |      |         |           |           |      |
| 786-0                      | 0.574 | 2.244                  | 2.331 | 2.319 | 2.216 | 1.798 | 0.556 | 105            | 105  | 98   | 73   | -3   | 2.02E-5 | 9.10E-5   | > 1.00E-4 |      |
| ACHN                       | 0.529 | 2.191                  | 2.160 | 2.098 | 2.023 | 1.572 | 0.546 | 98             | 94   | 90   | 63   | 1    | 1.61E-5 | > 1.00E-4 | > 1.00E-4 |      |
| CAKI-1                     | 0.961 | 3.348                  | 3.304 | 3.341 | 3.181 | 2.572 | 1.315 | 98             | 100  | 93   | 67   | 15   | 2.15E-5 | > 1.00E-4 | > 1.00E-4 |      |
| RXF 393                    | 0.781 | 1.345                  | 1.290 | 1.283 | 1.262 | 1.041 | 0.484 | 90             | 89   | 85   | 46   | -38  | 7.96E-6 | 3.53E-5   | > 1.00E-4 |      |
| SN12C                      | 0.795 | 2.589                  | 2.441 | 2.501 | 2.560 | 1.601 | 0.313 | 92             | 95   | 98   | 45   | -61  | 8.04E-6 | 2.66E-5   | 7.93E-5   |      |
| TK-10                      | 1.304 | 2.404                  | 2.260 | 2.250 | 2.144 | 2.143 | 1.294 | 87             | 86   | 76   | 76   | -1   | 2.19E-5 | 9.77E-5   | > 1.00E-4 |      |
| UO-31                      | 0.829 | 2.481                  | 2.276 | 2.265 | 2.091 | 1.416 | 0.824 | 88             | 87   | 76   | 36   | -1   | 4.42E-6 | 9.62E-5   | > 1.00E-4 |      |
| Prostate Cancer            |       |                        |       |       |       |       |       |                |      |      |      |      |         |           |           |      |
| DU-145                     | 0.638 | 2.285                  | 2.329 | 2.312 | 2.212 | 1.591 | 0.550 | 103            | 102  | 96   | 58   | -14  | 1.29E-5 | 6.42E-5   | > 1.00E-4 |      |
| Breast Cancer              |       |                        |       |       |       |       |       |                |      |      |      |      |         |           |           |      |
| MCF7                       | 0.359 | 1.923                  | 1.801 | 1.776 | 1.782 | 0.952 | 0.330 | 92             | 91   | 91   | 38   | -8   | 5.92E-6 | 6.64E-5   | > 1.00E-4 |      |
| MDA-MB-231(ATCC            | 0.469 | 1.279                  | 1.237 | 1.290 | 1.205 | 0.949 | 0.344 | 95             | 101  | 91   | 59   | -27  | 1.28E-5 | 4.88E-5   | > 1.00E-4 |      |
| HS 578T                    | 0.985 | 1.825                  | 1.756 | 1.735 | 1.716 | 1.536 | 0.909 | 92             | 89   | 87   | 66   | -8   | 1.63E-5 | 7.84E-5   | > 1.00E-4 |      |
| BT-549                     | 0.790 | 1.775                  | 1.782 | 1.773 | 1.719 | 1.348 | 0.540 | 101            | 100  | 94   | 57   | -32  | 1.19E-5 | 4.38E-5   | > 1.00E-4 |      |
| T-47D                      | 0.883 | 1.670                  | 1.620 | 1.510 | 1.563 | 1.018 | 0.697 | 94             | 80   | 86   | 17   | -21  | 3.35E-6 | 2.80E-5   | > 1.00E-4 |      |
| MDA-MB-468                 | 0.840 | 1.648                  | 1.609 | 1.619 | 1.611 | 1.097 | 0.716 | 95             | 96   | 95   | 32   | -15  | 5.17E-6 | 4.81E-5   | > 1.00E-4 |      |

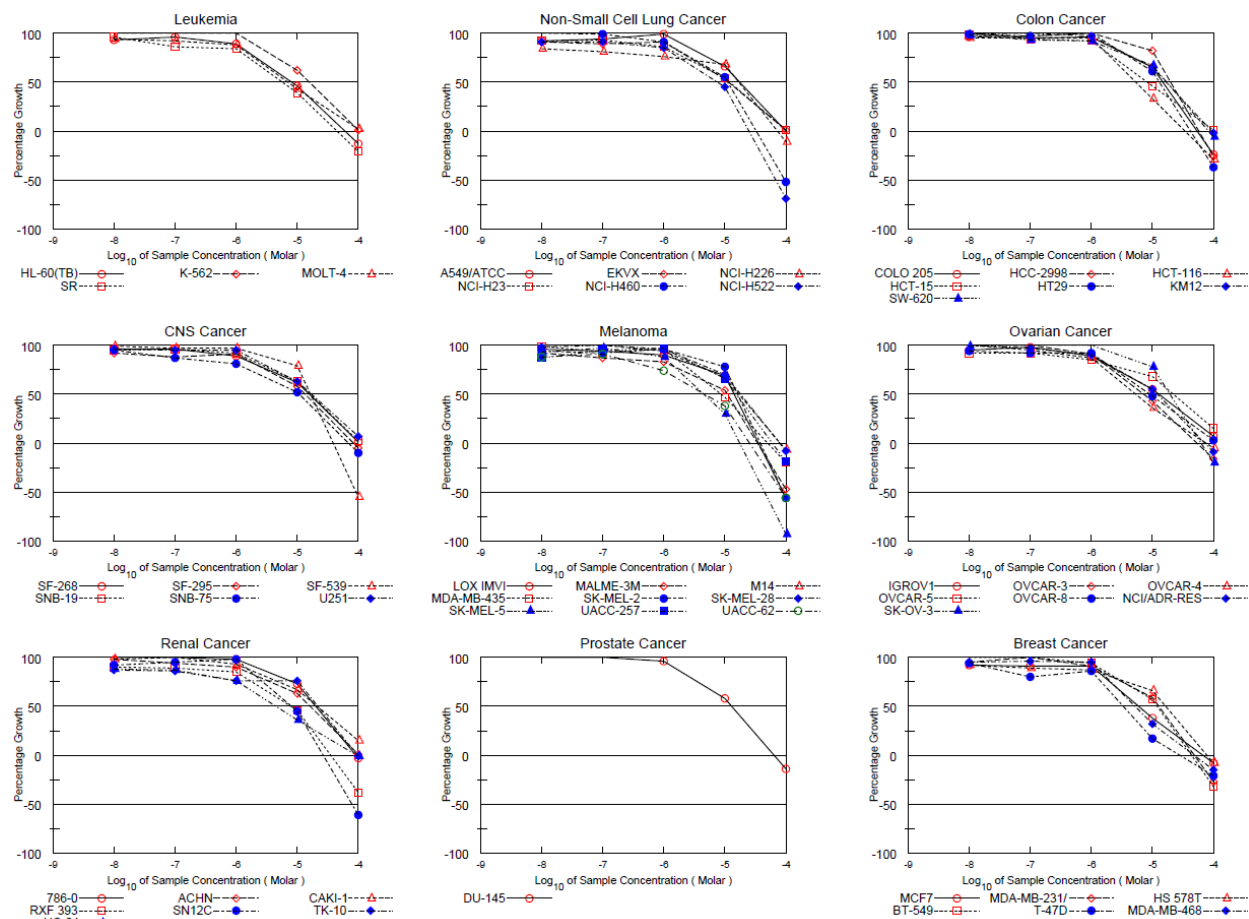

**Fig. S1** The NCI 60 tumor cell line five-dose testing results of CW3. As shown, CW3 exhibited a clear dose dependence against every cell line. In terms of cancer types, CW3 showed the highest lethal activity against Melanoma cancer cells.

## Synthesis of compounds 2 to 7 and 9 to 40

*(R)*-2-((*tert*-butoxycarbonyl)amino)-3-(3',5'-dichloro-[1,1'-biphenyl]-4-yl)propanoic acid (**2**). Compound **1** (5.00 g, 12.78 mmol), 3,5-dichlorophenylboronic acid (3.66 g, 19.18 mmol) and Na<sub>2</sub>CO<sub>3</sub> (8.13 g, 76.68 mmol) were combined in a 500 mL flask and filled with argon. Pd(PPh<sub>3</sub>)<sub>4</sub> (0.15 g, 0.13 mmol), THF (80 mL) and H<sub>2</sub>O (40 mL) were introduced into the flask under argon atmosphere and the mixture was heated with stirring at 70 °C for 48 h. After cooling to room temperature, the pH value was adjusted to 3.0 using a 1 M HCl aqueous solution. The THF was removed with a rotary evaporator and resulting liquid was extracted with CH<sub>2</sub>Cl<sub>2</sub>. The combined organics was dried with anhydrous MgSO<sub>4</sub>, filtered and concentrated to a colourless colloid, which was purified by liquid chromatography (Teledyne ISCO Combiflash Rf system, EtOAc in hexane) to afford a white solid (4.72 g, 90% yield). NMR δ H (400 MHz; CDCl<sub>3</sub>), 1.43 (9H, s), 3.12–3.26 (2H, m), 4.64 (1H, d), 4.96 (1H, d), 7.28 (2H, d), 7.32 (1H, s), 7.42 (2H, s), 7.46 (2H, d). <sup>13</sup>C NMR (CDCl<sub>3</sub>) 175.88, 155.40, 143.69, 137.31, 136.35, 135.28, 130.08, 127.22, 127.14, 125.48, 80.52, 54.25, 37.51, 28.29. MS (ESI): *m/z* Calcd for C<sub>20</sub>H<sub>22</sub>Cl<sub>2</sub>NO<sub>4</sub> [M + H]<sup>+</sup> 410.09, found 310.0 + 100.05 (Boc group).

*Methyl* (*R*)-2-((*tert*-butoxycarbonyl)amino)-3-(3',5'-dichloro-[1,1'-biphenyl]-4-yl)propanoate (**3**). Compound **2** (4.72 g, 11.50 mmol) was dissolved in 40 mL DMF, followed by the addition of 2.90 g (34.50 mmol) NaHCO<sub>3</sub> and 2.87 mL (46.00 mmol) CH<sub>3</sub>I. The solution was stirred at room temperature for 12 h. The solvent was removed with a rotary evaporator and resulting mixture was added 30 mL H<sub>2</sub>O and extracted with EtOAc. The combined organics was dried with anhydrous MgSO<sub>4</sub>, filtered and concentrated to a light yellow solid (4.46 g, 92% yield). NMR δ H (400 MHz; CDCl<sub>3</sub>), 1.42 (9H, s), 3.05–3.20 (2H, m), 3.73 (3H, s), 4.62 (1H, d), 5.06 (1H, d), 7.21 (2H, d), 7.30 (1H, s), 7.41 (2H, s), 7.45 (2H, d). <sup>13</sup>C NMR (CDCl<sub>3</sub>) 172.18, 155.04, 143.75, 137.23, 136.56, 135.27, 130.02, 127.16, 127.12, 125.50, 80.05, 54.35, 52.32, 38.06, 28.30. MS (ESI): *m/z* Calcd for C<sub>21</sub>H<sub>24</sub>Cl<sub>2</sub>NO<sub>4</sub> [M + H]<sup>+</sup> 424.11, found 324.0 + 100.05 (Boc group).

*Tert-butyl* (*R*)-(1-(3',5'-dichloro-[1,1'-biphenyl]-4-yl)-3-hydroxypropan-2-yl)carbamate (**4**). Compound **3** (3.00 g, 7.08 mmol) was dissolved in 50 mL CH<sub>2</sub>Cl<sub>2</sub>, followed by the dropwise addition of 21.30 mL 1 M DIBAL in PhMe. The solution was stirred at room temperature for 12 h, before being quenched by the dropwise addition of MeOH (8 mL). The mixture was evaporated using a rotary evaporator to remove the solvent and then added 40 mL EtOAc and 30 mL saturated Rochelle's salt aqueous solution. The mixture was stirred until the appearance of two distinct layers. The organic layer was separated and the aqueous layer was extracted with EtOAc for three times. The combined organics were dried by anhydrous MgSO<sub>4</sub>, filtered and concentrated to a colourless colloid, which was purified by HPLC to afford a colourless solid (1.96 g, 70% yield). NMR δ H (400 MHz; CDCl<sub>3</sub>), 1.42 (9H, s), 2.89 (2H, d), 3.56–3.71 (2H, m), 3.89 (1H, s), 4.77 (1H, s), 7.29–7.32 (3H, m), 7.43 (2H, s), 7.47 (2H, d). <sup>13</sup>C NMR (CDCl<sub>3</sub>) 156.13, 143.84, 138.46, 136.73, 135.25, 130.02, 127.14, 127.03, 125.44, 79.83, 64.11, 53.65, 37.12, 28.36. MS (ESI): *m/z* Calcd for C<sub>20</sub>H<sub>24</sub>Cl<sub>2</sub>NO<sub>3</sub> [M + H]<sup>+</sup> 396.11, found 296.0 + 100.05 (Boc group).

*Tert-butyl (R)-(1-(3',5'-dichloro-[1,1'-biphenyl]-4-yl)-3-oxopropan-2-yl)carbamate (5).* Compound **4** (1.30 g, 3.28 mmol) was dissolved in 50 mL CH<sub>2</sub>Cl<sub>2</sub>, followed by the addition of 1.39 g (3.28 mmol) Dess-Martin periodinane. The solution was stirred at room temperature for 5 h, before being quenched by 1.5 mL saturated Na<sub>2</sub>S<sub>2</sub>O<sub>3</sub> aqueous. The resulting mixture was added 30 mL H<sub>2</sub>O and extracted with CH<sub>2</sub>Cl<sub>2</sub>. The combined organics was dried with anhydrous MgSO<sub>4</sub>, filtered and concentrated to a yellow colloid, which was purified by HPLC to afford a light yellow solid (1.25 g, 97% yield). NMR  $\delta$  H (400 MHz; CDCl<sub>3</sub>), 1.45 (9H, s), 3.18 (2H, t), 4.47 (1H, d), 5.08 (1H, d), 7.26 (2H, d), 7.33 (1H, t), 7.43 (2H, d), 7.48 (2H, d). <sup>13</sup>C NMR (CDCl<sub>3</sub>) 198.99, 155.32, 143.61, 137.34, 136.29, 135.32, 130.05, 127.38, 127.21, 125.51, 60.75, 50.16, 35.09, 28.29. MS (ESI):  $m/z$  Calcd for C<sub>20</sub>H<sub>22</sub>Cl<sub>2</sub>NO<sub>3</sub> [M + H]<sup>+</sup> 394.10, found 294.0 + 100.05 (Boc group).

*Ethyl (R,E)-4-((tert-butoxycarbonyl)amino)-5-(3',5'-dichloro-[1,1'-biphenyl]-4-yl)pent-2-enoate (6).* Triethyl phosphonoacetate (0.43 mL, 2.18 mmol) was added into a solution of NaH (52.00 mg, 2.18 mmol) in DMF (30 mL) at 0 °C. The mixture was stirred at 0 °C for 1 h and then was added 0.66 g (1.68 mmol) compound **5**. Then, the solution was warmed to room temperature and stirred at room temperature for 2 h. 5mL 1 M HCl aqueous solution was added to the resulting mixture and then the solvent was removed with a rotary evaporator. The mixture was added 20 mL H<sub>2</sub>O and extracted with CH<sub>2</sub>Cl<sub>2</sub>. The combined organics was dried with anhydrous MgSO<sub>4</sub>, filtered and concentrated to a colourless colloid, which was purified by HPLC to afford a colourless solid (0.75 g, 96% yield). NMR  $\delta$  H (400 MHz; CDCl<sub>3</sub>), 1.28 (3H, t) 1.40 (9H, s), 2.95 (2H, d), 4.17–4.22 (2H, m), 4.53 (1H, d), 4.65 (1H, s), 5.86–5.91 (1H, m), 6.89–6.95 (1H, m), 7.26 (2H, d), 7.33 (1H, s), 7.44 (2H, s), 7.48 (2H, d). <sup>13</sup>C NMR (CDCl<sub>3</sub>) 165.73, 157.71, 149.60, 143.89, 137.38, 136.85, 135.24, 130.21, 127.06, 127.01, 125.46, 121.35, 79.84, 60.36, 50.52, 39.87, 27.99, 14.24. MS (ESI):  $m/z$  Calcd for C<sub>24</sub>H<sub>28</sub>Cl<sub>2</sub>NO<sub>4</sub> [M + H]<sup>+</sup> 464.14, found 364.1+ 100.05 (Boc group).

*Ethyl (R,E)-4-amino-5-(3',5'-dichloro-[1,1'-biphenyl]-4-yl)pent-2-enoate (7).* Compound **6** (0.60g, 1.29 mmol) was dissolved in 30 mL EtOH, followed by the dropwise addition of 7.0 mL 4 M HCl in dioxane. The solution was stirred at room temperature for 6 h. The solvent was removed with a rotary evaporator and the resulting mixture was added 10 mL H<sub>2</sub>O and extracted with CH<sub>2</sub>Cl<sub>2</sub>. The combined organics was dried with anhydrous MgSO<sub>4</sub>, filtered and concentrated to a colourless solid (0.46 g, 98% yield). NMR  $\delta$  H (400 MHz; CDCl<sub>3</sub>), 1.21 (3H, t), 3.06–3.26 (2H, d), 4.08–4.14 (2H, m), 4.16 (1H, s), 5.98 (1H, d), 6.89 (1H, s), 7.28 (2H, s), 7.32 (1H, t), 7.39 (2H, d), 7.46 (2H, d). <sup>13</sup>C NMR (CDCl<sub>3</sub>) 165.70, 143.30, 140.58, 137.97, 135.35, 134.41, 130.08, 127.65, 127.35, 125.84, 125.47, 61.38, 53.85, 38.67, 13.92. MS (ESI):  $m/z$  Calcd for C<sub>19</sub>H<sub>20</sub>Cl<sub>2</sub>NO<sub>2</sub> [M + H]<sup>+</sup> 364.09, found 364.1.

*Ethyl (R,E)-4-(but-3-enamido)-5-(3',5'-dichloro-[1,1'-biphenyl]-4-yl)pent-2-enoate (9, CW4).* Compound **9** was synthesized using the same experimental procedure as compound **8** except that acrylic acid was replaced by 3-butenic acid. A white solid was obtained after purification by HPLC (0.13 g, 55% yield). NMR  $\delta$  H (400 MHz; CDCl<sub>3</sub>), 1.27 (3H, t), 1.85 (2H, d), 3.00 (2H, d), 4.15–4.21 (2H, m), 5.07 (1H, t), 5.50 (1H, d), 5.77 (1H, d), 5.86 (1H, d), 6.26



(1H, d), 6.91–6.96 (1H, m), 7.27 (2H, s), 7.33 (1H, t), 7.44 (2H, d), 7.47 (2H, d). <sup>13</sup>C NMR (CDCl<sub>3</sub>) 166.04, 165.39, 146.55, 143.63, 141.29, 137.18, 136.70, 135.29, 130.01, 127.27, 127.15, 125.49, 124.36, 121.72, 60.61, 50.58, 39.97, 17.80, 14.22. MS (ESI): *m/z* Calcd for C<sub>23</sub>H<sub>24</sub>Cl<sub>2</sub>NO<sub>3</sub> [M + H]<sup>+</sup> 432.11, found 432.0.

*(R,E)*-4-acrylamido-5-(3',5'-dichloro-[1,1'-biphenyl]-4-yl)pent-2-enoic acid (**10**, **CW5**). A mixture of compound **8** (60 mg, 0.14 mmol), MeOH (5 mL) and H<sub>2</sub>O (5 mL) was added 29 mg (0.72 mmol) NaOH and stirred at room temperature for 12 h. The pH value of the resulting solution was adjusted to 3.0 using a 1 M HCl aqueous solution. The MeOH solvent was removed with a rotary evaporator, followed by the extraction with EtOAc. The combined organics were dried with anhydrous MgSO<sub>4</sub>, filtered and concentrated to a white solid (42 mg, 77% yield). NMR δ H (400 MHz; CDCl<sub>3</sub>), 2.94 (2H, d), 5.01 (1H, s), 5.60 (1H, d), 5.80 (1H, d), 6.00 (1H, m), 6.21 (1H, d), 6.91–6.97 (1H, m), 7.18 (2H, d), 7.24 (1H, s), 7.34 (2H, s), 7.36 (2H, d). <sup>13</sup>C NMR (CDCl<sub>3</sub>) 169.57, 164.97, 148.64, 143.53, 137.40, 136.32, 135.32, 130.08, 129.99, 127.72, 127.39, 127.23, 125.51, 121.05, 50.78, 28.86. MS (ESI): *m/z* Calcd for C<sub>20</sub>H<sub>18</sub>Cl<sub>2</sub>NO<sub>3</sub> [M + H]<sup>+</sup> 390.07, found 390.0.

*(R,E)*-4-(but-3-enamido)-5-(3',5'-dichloro-[1,1'-biphenyl]-4-yl)pent-2-enoic acid (**11**, **CW6**). Compound **11** was synthesized using the same experimental procedure as compound **10**, except that compound **8** was replaced with compound **9** (60 mg, 0.14 mmol). 45 mg white solid was obtained (80% yield). NMR δ H (400 MHz; CDCl<sub>3</sub>), 1.86 (2H, d), 3.01 (2H, d), 5.09 (1H, d), 5.35–5.43 (1H, m), 5.76–5.89 (2H, m), 6.92–6.97 (1H, m), 7.00–7.05 (1H, m), 7.25 (2H, s), 7.33 (1H, t), 7.44 (2H, d), 7.48 (2H, d). <sup>13</sup>C NMR (CDCl<sub>3</sub>) 169.79, 165.69, 148.92, 143.55, 141.84, 137.32, 136.41, 135.30, 129.96, 127.35, 127.20, 125.49, 124.12, 120.95, 50.72, 39.79, 17.83. MS (ESI): *m/z* Calcd for C<sub>21</sub>H<sub>20</sub>Cl<sub>2</sub>NO<sub>3</sub> [M + H]<sup>+</sup> 404.08, found 404.0.

*(R)*-2-amino-3-(3',5'-dichloro-[1,1'-biphenyl]-4-yl)propan-1-ol (**12**). Compound **12** was synthesized using the same experimental procedure as compound **7**, except that compound **6** was replaced with compound **4** (0.60 g, 1.52 mmol). 0.43 g white solid was obtained (96% yield). NMR δ H (400 MHz; CDCl<sub>3</sub>) 2.70–2.89 (2H, m), 3.26 (1H, s), 3.48 (2H, m), 7.27–7.30 (3H, m), 7.39 (2H, s), 7.44 (2H, d). <sup>13</sup>C NMR (CDCl<sub>3</sub>) 143.04, 137.98, 135.36, 134.68, 129.60, 127.69, 127.42, 125.34, 60.86, 54.84, 34.98. MS (ESI): *m/z* Calcd for C<sub>15</sub>H<sub>16</sub>Cl<sub>2</sub>NO [M + H]<sup>+</sup> 296.06, found 296.1.

*(R)*-*N*-(1-(3',5'-dichloro-[1,1'-biphenyl]-4-yl)-3-hydroxypropan-2-yl)acrylamide (**13**, **CW1**). Compound **13** was synthesized using the same experimental procedure as compound **8**, except that compound **7** was replaced with compound **12** (0.16 g, 0.55 mmol). 0.12 g white solid was obtained (62% yield). NMR δ H (400 MHz; CDCl<sub>3</sub>), 2.93 (2H, s), 3.63–3.69 (2H, d), 4.27 (1H, s), 5.62 (1H, d), 6.05–6.12 (1H, m), 6.25 (1H, d), 6.36 (1H, s), 7.28 (3H, m), 7.37 (2H, s), 7.41 (2H, d). <sup>13</sup>C NMR (CDCl<sub>3</sub>) 166.09, 143.61, 138.14, 136.83, 135.25, 130.63, 129.91, 127.20, 127.08, 125.39, 63.48, 52.80, 36.58. MS (ESI): *m/z* Calcd for C<sub>18</sub>H<sub>18</sub>Cl<sub>2</sub>NO<sub>2</sub> [M + H]<sup>+</sup> 350.07, found 350.1.

*(R)*-*N*-(1-(3',5'-dichloro-[1,1'-biphenyl]-4-yl)-3-hydroxypropan-2-yl)but-3-enamide (**14**, **CW2**). Compound **14** was synthesized using the same experimental procedure as compound **9**,

except that compound **7** was replaced by compound **12** (0.16 g, 0.55 mmol). 0.13g white solid was obtained (65% yield). NMR  $\delta$  H (400 MHz; CDCl<sub>3</sub>), 1.80 (2H, d), 2.94 (2H, d), 3.59–3.71 (2H, m), 4.28 (1H, s), 5.81 (1H, d), 6.44 (1H, d), 6.76–6.85 (1H, m), 7.27 (2H, m), 7.30 (1H, s), 7.35 (2H, d), 7.40 (2H, d). <sup>13</sup>C NMR (CDCl<sub>3</sub>) 166.66, 143.64, 140.65, 138.37, 136.69, 135.23, 129.93, 127.13, 127.03, 125.35, 124.87, 63.53, 52.74, 36.64, 17.79. MS (ESI):  $m/z$  Calcd for C<sub>19</sub>H<sub>20</sub>Cl<sub>2</sub>NO<sub>2</sub> [M + H]<sup>+</sup> 364.09, found 364.0.

*Ethyl (2S,3R,4R)-4-((tert-butoxycarbonyl)amino)-5-(3',5'-dichloro-[1,1'-biphenyl]-4-yl)-2,3-dihydroxypentanoate (15)*. A mixture of methanesulfonamide (82 mg, 0.86 mmol), K<sub>3</sub>Fe(CN)<sub>6</sub> (0.85 g, 2.58 mmol), OsO<sub>4</sub> (2.2 mg, 8.6  $\mu$ mol), (DHQD)<sub>2</sub>PHAL (13.4 mg, 17 mmol) and K<sub>2</sub>CO<sub>3</sub> (0.36 g, 2.58 mmol) in t-BuOH (10 mL) and H<sub>2</sub>O (10 mL) was treated with compound **6** (0.40 g, 0.86 mmol) and stirred at room temperature for 12 h. The resulting solution was cooled to 0 °C and then treated with 1.25 g Na<sub>2</sub>SO<sub>3</sub>, followed by stirred at 0 °C for 30 min and at room temperature for 1 h. The mixture was extracted with EtOAc. The combined organics were washed with brine, dried with anhydrous MgSO<sub>4</sub>, filtered and concentrated to a white solid, which was purified by HPLC to afford a white solid (0.28 g, 65% yield). NMR  $\delta$  H (400 MHz; CDCl<sub>3</sub>), 1.29 (3H, t), 1.39 (9H, s), 2.93–3.12 (2H, m), 3.83 (1H, s), 4.26 (2H, m), 4.36 (1H, s), 4.79 (1H, d), 7.33 (3H, m), 7.44 (2H, t), 7.47 (2H, d). <sup>13</sup>C NMR (MeOD) 172.92, 156.31, 143.87, 136.62, 135.46, 135.20, 130.09, 127.10, 127.03, 125.39, 80.34, 72.79, 71.51, 62.08, 53.66, 36.78, 28.27, 14.13. MS (ESI):  $m/z$  Calcd for C<sub>24</sub>H<sub>30</sub>Cl<sub>2</sub>NO<sub>6</sub> [M + H]<sup>+</sup> 498.15, found 398.1 + 100.05 (Boc group).

*Ethyl (2S,3R,4R)-4-amino-5-(3',5'-dichloro-[1,1'-biphenyl]-4-yl)-2,3-dihydroxypentanoate (16)*. Compound **16** was synthesized using the same experimental procedure as compound **7**, except that compound **6** was replaced with compound **15** (0.25g, 0.50 mmol). 0.19 g white solid was obtained (95% yield). NMR  $\delta$  H (400 MHz; CDCl<sub>3</sub>), 1.18 (3H, t), 3.07 (2H, s), 3.75 (1H, s), 4.15 (2H, s), 4.32 (1H, s), 4.73 (1H, s), 7.32 (3H, m), 7.38 (2H, d), 7.46 (2H, d). <sup>13</sup>C NMR (CDCl<sub>3</sub>) 172.49, 143.30, 137.95, 137.84, 135.36, 130.08, 127.69, 127.35, 125.42, 73.83, 67.68, 62.53, 56.38, 37.15, 13.81. MS (ESI):  $m/z$  Calcd for C<sub>19</sub>H<sub>22</sub>Cl<sub>2</sub>NO<sub>4</sub> [M + H]<sup>+</sup> 398.09, found 398.1.

*Ethyl (2S,3R,4R)-4-acrylamido-5-(3',5'-dichloro-[1,1'-biphenyl]-4-yl)-2,3-dihydroxypentanoate (17)*. Compound **17** was synthesized using the same experimental procedure as compound **8**, except that compound **7** was replaced with compound **16** (85 mg, 0.21 mmol). 64 mg white solid was obtained (67% yield). <sup>1</sup>H NMR  $\delta$  H (400 MHz; CDCl<sub>3</sub>), 1.26 (3H, t), 3.04 (2H, m), 3.78 (1H, d), 3.89 (1H, s), 4.22 (2H, m), 4.33 (1H, s), 5.65 (1H, t), 6.04–6.11 (1H, m), 6.24 (1H, d), 7.32 (3H, m), 7.42 (2H, s), 7.45 (2H, d). <sup>13</sup>C NMR (CDCl<sub>3</sub>) 172.92, 166.57, 143.71, 137.93, 136.93, 135.26, 130.39, 129.92, 127.36, 127.22, 127.08, 125.45, 72.38, 70.91, 62.34, 52.96, 37.25, 14.05. MS (ESI):  $m/z$  Calcd for C<sub>22</sub>H<sub>24</sub>Cl<sub>2</sub>NO<sub>5</sub> [M + H]<sup>+</sup> 452.10, found 452.1.

*Ethyl (2S,3R,4R)-4-(but-3-enamido)-5-(3',5'-dichloro-[1,1'-biphenyl]-4-yl)-2,3-dihydroxypentanoate (18)*. Compound **18** was synthesized using the same experimental procedure as compound **9** except that compound **7** was replaced with compound **16** (85 mg, 0.21 mmol). 63 mg white solid was obtained (64% yield). NMR  $\delta$  H (400 MHz; CDCl<sub>3</sub>), 1.34 (3H, t), 1.82 (2H,

d), 3.04 (2H, m), 3.18 (2H, m), 3.87 (1H, t), 4.25 (2H, m), 5.75 (1H, t), 5.89 (1H, m), 6.82 (1H, m), 7.31 (3H, m), 7.42 (2H, d), 7.45 (2H, d). <sup>13</sup>C NMR (CDCl<sub>3</sub>) 172.26, 167.27, 143.76, 141.97, 141.14, 137.01, 135.29, 129.92, 127.34, 127.20, 125.45, 124.07, 73.37, 70.90, 62.83, 54.84, 36.36, 17.80, 14.19. MS (ESI): *m/z* Calcd for C<sub>23</sub>H<sub>26</sub>Cl<sub>2</sub>NO<sub>5</sub> [M + H]<sup>+</sup> 466.12, found 466.1.

(2*S*,3*R*,4*R*)-4-acrylamido-5-(3',5'-dichloro-[1,1'-biphenyl]-4-yl)-2,3-dihydroxypentanoic acid (**19**, **CW9**). A mixture of compound **17** (35 mg, 0.077 mmol), THF (5 mL), MeOH (5 mL) and H<sub>2</sub>O (5 mL) was added 15 mg (0.38 mmol) NaOH and stirred at room temperature for 12 h. The pH value of the resulting solution was adjusted to 3.0 using a 1 M HCl aqueous solution. The THF and MeOH solvent was removed with a rotary evaporator, followed by the extraction with EtOAc. The combined organics were dried with anhydrous MgSO<sub>4</sub>, filtered and concentrated to a white solid (23 mg, 70% yield). NMR δ H (400 MHz; CDCl<sub>3</sub>), 2.88–3.22 (2H, m), 4.16 (1H, s), 4.38 (2H, s), 5.69 (1H, d), 6.10–6.27 (2H, m), 7.24 (2H, s), 7.28 (1H, s), 7.32–7.37 (4H, m). <sup>13</sup>C NMR (MeOD) 176.19, 169.19, 149.02, 139.56, 138.87, 134.97, 129.91, 127.72, 126.46, 125.39, 124.94, 124.34, 74.03, 73.06, 54.54, 37.44. MS (ESI): *m/z* Calcd for C<sub>20</sub>H<sub>20</sub>Cl<sub>2</sub>NO<sub>5</sub> [M + H]<sup>+</sup> 424.07, found 424.1.

(2*S*,3*R*,4*R*)-4-(but-3-enamido)-5-(3',5'-dichloro-[1,1'-biphenyl]-4-yl)-2,3-dihydroxypentanoic acid (**20**, **CW10**). Compound **20** was synthesized using the same experimental procedure as compound **19**, except that compound **17** was replaced with compound **18** (35 mg, 0.075 mmol). 25 mg white solid was obtained (76% yield). NMR δ H (400 MHz; CDCl<sub>3</sub>), 1.63 (2H, t), 2.86–2.98 (2H, m), 3.12 (1H, s), 3.92 (1H, d), 4.24 (2H, d), 5.65–5.75 (1H, m), 6.56–6.69 (2H, m), 7.14–7.17 (3H, m), 7.19 (2H, s), 7.24 (2H, d). <sup>13</sup>C NMR (CDCl<sub>3</sub>) 174.82, 168.38, 143.43, 137.46, 136.85, 136.65, 135.19, 129.72, 127.18, 125.27, 125.16, 123.58, 73.43, 71.71, 52.63, 37.03, 17.86. MS (ESI): *m/z* Calcd for C<sub>21</sub>H<sub>22</sub>Cl<sub>2</sub>NO<sub>5</sub> [M + H]<sup>+</sup> 438.09, found 438.1.

(*S*)-2-((*tert*-butoxycarbonyl)amino)-3-(3',5'-dichloro-[1,1'-biphenyl]-4-yl)propanoic acid (**22**). Compound **22** was synthesized using the same experimental procedure as compound **2**, except that compound **1** was replaced with compound **21**. Final product was 5.14 g at a yield of 98%. NMR δ H (400 MHz; CDCl<sub>3</sub>), 1.42 (9H, s), 3.09–3.26 (2H, m), 4.65 (1H, d), 5.00 (1H, d), 7.28 (2H, s), 7.31 (1H, s), 7.41 (2H, s), 7.46 (2H, d). <sup>13</sup>C NMR (CDCl<sub>3</sub>) δ 175.88, 155.40, 143.69, 137.31, 136.35, 135.28, 130.08, 127.22, 127.14, 125.48, 80.51, 54.25, 37.51, 28.29. MS (ESI): *m/z* Calcd for C<sub>20</sub>H<sub>22</sub>Cl<sub>2</sub>NO<sub>4</sub> [M + H]<sup>+</sup> 410.09, found 310.0 + 100.05 (Boc group).

Methyl (*S*)-2-((*tert*-butoxycarbonyl)amino)-3-(3',5'-dichloro-[1,1'-biphenyl]-4-yl)propanoate (**23**). Compound **23** was synthesized using the same experimental procedure as compound **3**, except that compound **1** was replaced with compound **21**. Final product was 5.10 g at a yield of 96%. NMR δ H (400 MHz; CDCl<sub>3</sub>), 1.42 (9H, s), 3.05–3.20 (2H, m), 3.74 (3H, s), 4.62 (1H, d), 5.09 (1H, d), 7.21 (2H, d), 7.30 (1H, s), 7.41 (2H, s), 7.44 (2H, d). <sup>13</sup>C NMR (CDCl<sub>3</sub>) 172.21, 155.13, 143.70, 137.17, 136.55, 135.25, 130.00, 127.14, 127.09, 125.45, 80.12, 54.39, 52.34, 38.02, 28.30. MS (ESI): *m/z* Calcd for C<sub>21</sub>H<sub>24</sub>Cl<sub>2</sub>NO<sub>4</sub> [M + H]<sup>+</sup> 424.11, found 324.0 + 100.05 (Boc group).

*Tert*-butyl (*S*)-(1-(3',5'-dichloro-[1,1'-biphenyl]-4-yl)-3-hydroxypropan-2-yl)carbamate (**24**). Compound **24** was synthesized using the same experimental procedure as compound **4**,

except that compound **1** was replaced with compound **21**. Final product was 3.71 g at a yield of 78%. NMR  $\delta$  H (400 MHz; CDCl<sub>3</sub>), 1.40 (9H, s), 2.89 (2H, d), 3.55–3.68 (2H, m), 3.91 (1H, s), 5.07 (1H, s), 7.27–7.30 (3H, m), 7.37 (2H, s), 7.41 (2H, d). <sup>13</sup>C NMR (CDCl<sub>3</sub>) 156.20, 143.80, 138.59, 136.58, 135.21, 130.05, 127.06, 126.97, 125.38, 79.74, 63.79, 53.61, 37.11, 28.39. MS (ESI):  $m/z$  Calcd for C<sub>20</sub>H<sub>24</sub>Cl<sub>2</sub>NO<sub>3</sub> [M + H]<sup>+</sup> 396.11, found 296.0 + 100.05 (Boc group).

*Tert-butyl (S)-(1-(3',5'-dichloro-[1,1'-biphenyl]-4-yl)-3-oxopropan-2-yl)carbamate (25)*. Compound **25** was synthesized using the same experimental procedure as compound **5**, except that compound **1** was replaced with compound **21**. Final product was 1.66 g at a yield of 90%. NMR  $\delta$  H (400 MHz; CDCl<sub>3</sub>), 1.44 (9H, s), 3.17 (2H, t), 4.47 (1H, d), 5.08 (1H, d), 7.26 (2H, d), 7.33 (1H, t), 7.43 (2H, d), 7.48 (2H, d). <sup>13</sup>C NMR (CDCl<sub>3</sub>) 198.99, 155.46, 143.62, 137.35, 136.28, 135.33, 130.06, 127.38, 127.22, 125.52, 60.81, 50.31, 35.62, 28.28. MS (ESI):  $m/z$  Calcd for C<sub>20</sub>H<sub>22</sub>Cl<sub>2</sub>NO<sub>3</sub> [M + H]<sup>+</sup> 394.10, found 294.0 + 100.05 (Boc group).

*Ethyl (S,E)-4-((tert-butoxycarbonyl)amino)-5-(3',5'-dichloro-[1,1'-biphenyl]-4-yl)pent-2-enoate (26)*. Compound **26** was synthesized using the same experimental procedure as compound **6**, except that compound **1** was replaced with compound **21**. Final product was 1.90 g at a yield of 97%. NMR  $\delta$  H (400 MHz; CDCl<sub>3</sub>), 1.28 (3H, t), 1.40 (9H, s), 2.94 (2H, d), 4.16–4.22 (2H, m), 4.63 (2H, s), 5.89 (1H, d), 6.90–6.95 (1H, m), 7.26 (2H, d), 7.31 (1H, t), 7.42 (2H, d), 7.46 (2H, d). <sup>13</sup>C NMR (CDCl<sub>3</sub>) 166.09, 154.96, 147.22, 143.73, 137.07, 136.98, 135.27, 130.09, 127.18, 127.10, 125.47, 121.35, 79.98, 60.54, 52.25, 40.56, 28.30, 14.23. MS (ESI):  $m/z$  Calcd for C<sub>24</sub>H<sub>28</sub>Cl<sub>2</sub>NO<sub>4</sub> [M + H]<sup>+</sup> 464.14, found 364.1 + 100.05 (Boc group).

*Ethyl (S,E)-4-amino-5-(3',5'-dichloro-[1,1'-biphenyl]-4-yl)pent-2-enoate (27)*. Compound **27** was synthesized using the same experimental procedure as compound **7**, except that compound **1** was replaced with compound **21**. Final product was 0.74 g at a yield of 99%. NMR  $\delta$  H (400 MHz; CDCl<sub>3</sub>), 1.21 (3H, t), 3.02–3.28 (2H, m), 4.08–4.13 (2H, m), 4.16 (1H, s), 5.97 (1H, d), 6.86–6.91 (1H, m), 7.26 (2H, d), 7.32 (1H, t), 7.39 (2H, d), 7.46 (2H, d). <sup>13</sup>C NMR (CDCl<sub>3</sub>) 165.68, 143.31, 140.58, 137.96, 135.35, 134.44, 130.07, 127.64, 127.35, 125.85, 125.47, 61.36, 53.84, 38.68, 13.92. MS (ESI):  $m/z$  Calcd for C<sub>19</sub>H<sub>20</sub>Cl<sub>2</sub>NO<sub>2</sub> [M + H]<sup>+</sup> 364.09, found 364.1.

*Ethyl (S,E)-4-acrylamido-5-(3',5'-dichloro-[1,1'-biphenyl]-4-yl)pent-2-enoate (28, CW13)*. Compound **28** was synthesized using the same experimental procedure as compound **8**, except that compound **1** was replaced with compound **21**. Final product was 0.25 g at a yield of 59%. NMR  $\delta$  H (400 MHz; CDCl<sub>3</sub>), 1.19 (3H, t), 2.92 (2H, d), 4.07–4.13 (2H, m), 4.99 (1H, s), 5.58 (1H, d), 5.81 (1H, d), 5.93 (1H, s), 6.01 (1H, m), 6.20 (1H, d), 6.86 (1H, m), 7.17 (2H, d), 7.23 (1H, t), 7.34 (2H, d), 7.38 (2H, d). <sup>13</sup>C NMR (CDCl<sub>3</sub>) 165.01, 164.03, 145.26, 142.54, 136.17, 135.62, 134.25, 129.20, 128.95, 126.44, 126.24, 126.13, 124.43, 120.84, 59.65, 49.83, 38.91, 13.18. MS (ESI):  $m/z$  Calcd for C<sub>22</sub>H<sub>22</sub>Cl<sub>2</sub>NO<sub>3</sub> [M + H]<sup>+</sup> 418.10, found 418.0.

*Ethyl (S,E)-4-(but-3-enamido)-5-(3',5'-dichloro-[1,1'-biphenyl]-4-yl)pent-2-enoate (29, CW14)*. Compound **29** was synthesized using the same experimental procedure as compound **9**, except that compound **1** was replaced with compound **21**. Final product was 0.30 g at a yield of 68%. NMR  $\delta$  H (400 MHz; CDCl<sub>3</sub>), 1.27 (3H, t), 1.86 (2H, d), 3.00 (2H, d), 4.16–4.21 (2H, m),

5.08 (1H, t), 5.32 (1H, d), 5.76 (1H, d), 5.86 (1H, d), 6.86 (1H, m), 6.94 (1H, m), 7.26 (2H, d), 7.33 (1H, s), 7.44 (2H, s), 7.48 (2H, d).  $^{13}\text{C}$  NMR ( $\text{CDCl}_3$ ) 164.97, 164.25, 145.50, 142.60, 140.22, 136.18, 135.44, 134.27, 128.98, 126.26, 126.07, 124.46, 123.35, 120.70, 59.57, 49.51, 38.96, 16.77, 13.19. MS (ESI):  $m/z$  Calcd for  $\text{C}_{23}\text{H}_{24}\text{Cl}_2\text{NO}_3$   $[\text{M} + \text{H}]^+$  432.11, found 432.0.

*(S,E)-4-acrylamido-5-(3',5'-dichloro-[1,1'-biphenyl]-4-yl)pent-2-enoic acid (30, CW15)*. Compound **30** was synthesized using the same experimental procedure as compound **10**, except that compound **1** was replaced with compound **21**. Final product was 0.17 g at a yield of 74%. NMR  $\delta$  H (400 MHz;  $\text{CDCl}_3$ ), 3.02 (2H, d), 5.10 (1H, s), 5.69 (1H, d), 5.87 (1H, d), 6.08 (1H, m), 6.29 (1H, d), 7.03 (1H, m), 7.24 (2H, d), 7.33 (1H, s), 7.43 (2H, s), 7.48 (2H, d).  $^{13}\text{C}$  NMR ( $\text{CDCl}_3$ ) 169.53, 164.98, 148.63, 143.53, 137.40, 136.32, 135.32, 130.08, 129.99, 127.72, 127.39, 127.22, 125.51, 121.05, 50.78, 28.86. MS (ESI):  $m/z$  Calcd for  $\text{C}_{20}\text{H}_{18}\text{Cl}_2\text{NO}_3$   $[\text{M} + \text{H}]^+$  390.07, found 390.0.

*(S,E)-4-(but-3-enamido)-5-(3',5'-dichloro-[1,1'-biphenyl]-4-yl)pent-2-enoic acid (31, CW16)*. Compound **31** was synthesized using the same experimental procedure as compound **11**, except that compound **1** was replaced with compound **21**. Final product was 0.22 g at a yield of 80%. NMR  $\delta$  H (400 MHz;  $\text{CDCl}_3$ ), 1.76 (2H, d), 2.92 (2H, d), 5.00 (1H, t), 5.63 (1H, d), 5.69–5.80 (2H, m), 6.75–6.80 (1H, m), 6.92–6.97 (1H, m), 7.18 (2H, d), 7.24 (1H, s), 7.34 (2H, s), 7.38 (2H, d).  $^{13}\text{C}$  NMR ( $\text{CDCl}_3$ ) 169.14, 164.54, 147.83, 142.52, 140.52, 136.21, 135.51, 134.26, 128.95, 126.29, 126.14, 124.44, 123.24, 120.07, 49.68, 38.83, 16.80. MS (ESI):  $m/z$  Calcd for  $\text{C}_{21}\text{H}_{20}\text{Cl}_2\text{NO}_3$   $[\text{M} + \text{H}]^+$  404.08, found 404.0.

*(S)-2-amino-3-(3',5'-dichloro-[1,1'-biphenyl]-4-yl)propan-1-ol (32)*. Compound **32** was synthesized using the same experimental procedure as compound **12**, except that compound **1** was replaced with compound **21**. Final product was 1.37 g at a yield of 99%. NMR  $\delta$  H (400 MHz;  $\text{CDCl}_3$ ) 2.90–2.96 (2H, m), 3.61–3.82 (3H, m), 7.20 (2H, d), 7.29 (1H, s), 7.33 (2H, s), 7.41 (2H, d).  $^{13}\text{C}$  NMR ( $\text{CDCl}_3$ ) 143.08, 138.07, 135.37, 134.59, 129.62, 127.76, 127.43, 125.38, 60.98, 54.89, 34.99. MS (ESI):  $m/z$  Calcd for  $\text{C}_{15}\text{H}_{16}\text{Cl}_2\text{NO}$   $[\text{M} + \text{H}]^+$  296.06, found 296.1.

*(S)-N-(1-(3',5'-dichloro-[1,1'-biphenyl]-4-yl)-3-hydroxypropan-2-yl)acrylamide (33, CW11)*. Compound **33** was synthesized using the same experimental procedure as compound **13**, except that compound **1** was replaced with compound **21**. Final product was 0.57 g at a yield of 99%. NMR  $\delta$  H (400 MHz;  $\text{CDCl}_3$ ), 2.92 (2H, d), 3.60–3.73 (2H, m), 4.28 (1H, s), 5.59 (1H, d), 6.06–6.13 (1H, m), 6.22 (1H, d), 6.50 (1H, d), 7.28 (3H, m), 7.36 (2H, d), 7.39 (2H, d).  $^{13}\text{C}$  NMR ( $\text{CDCl}_3$ ) 166.32, 143.63, 138.19, 136.74, 135.22, 130.60, 129.89, 127.28, 127.15, 127.04, 125.36, 63.59, 52.80, 36.54. MS (ESI):  $m/z$  Calcd for  $\text{C}_{18}\text{H}_{18}\text{Cl}_2\text{NO}_2$   $[\text{M} + \text{H}]^+$  350.07, found 350.1.

*(S)-N-(1-(3',5'-dichloro-[1,1'-biphenyl]-4-yl)-3-hydroxypropan-2-yl)but-3-enamide (34, CW12)*. Compound **34** was synthesized using the same experimental procedure as compound **14**, except that compound **1** was replaced with compound **21**. Final product was 0.63 g at a yield of 75%. NMR  $\delta$  H (400 MHz;  $\text{CDCl}_3$ ), 1.78 (2H, d), 2.92 (2H, d), 3.59–3.72 (2H, m), 4.28 (1H, s), 5.82 (1H, d), 6.62 (1H, d), 6.73–6.83 (2H, m), 7.28 (3H, m), 7.36 (2H, d), 7.39 (2H, d).  $^{13}\text{C}$  NMR ( $\text{CDCl}_3$ ) 166.89, 143.69, 140.65, 138.44, 136.57, 135.19, 129.92, 127.07, 126.97, 125.34,

124.81, 63.55, 52.70, 36.59, 17.76. MS (ESI):  $m/z$  Calcd for  $C_{19}H_{20}Cl_2NO_2$   $[M + H]^+$  364.09, found 364.0.

*Ethyl (2R,3S,4S)-4-((tert-butoxycarbonyl)amino)-5-(3',5'-dichloro-[1,1'-biphenyl]-4-yl)-2,3-dihydroxypentanoate (35)*. Compound **35** was synthesized using the same experimental procedure as compound **15**, except that compound **1** was replaced with compound **21**. Final product was 0.68 g at a yield of 75%. NMR  $\delta$  H (400 MHz;  $CDCl_3$ ), 1.28 (3H, t), 1.37 (9H, s), 2.90–3.16 (2H, m), 3.83 (1H, t), 4.26 (2H, m), 4.39 (1H, d), 4.92 (1H, d), 7.30 (3H, m), 7.41 (2H, s), 7.44 (2H, d).  $^{13}C$  NMR ( $CDCl_3$ ) 172.86, 156.40, 143.87, 137.94, 136.71, 135.23, 130.07, 127.08, 127.00, 125.42, 80.49, 72.75, 71.00, 62.19, 53.69, 36.78, 28.27, 14.13. MS (ESI):  $m/z$  Calcd for  $C_{24}H_{30}Cl_2NO_6$   $[M + H]^+$  498.15, found 398.1 + 100.05 (Boc group).

*Ethyl (2R,3S,4S)-4-amino-5-(3',5'-dichloro-[1,1'-biphenyl]-4-yl)-2,3-dihydroxypentanoate (36)*. Compound **36** was synthesized using the same experimental procedure as compound **16**, except that compound **1** was replaced with compound **21**. Final product was 0.46 g at a yield of 84%. NMR  $\delta$  H (400 MHz;  $CDCl_3$ ), 1.19 (3H, t), 3.07 (2H, s), 3.77 (1H, s), 4.15 (2H, s), 4.33 (1H, s), 4.73 (1H, s), 7.32 (3H, m), 7.38 (2H, d), 7.46 (2H, d).  $^{13}C$  NMR ( $CDCl_3$ ) 172.48, 143.29, 138.00, 137.90, 135.37, 130.06, 127.74, 127.38, 125.43, 73.79, 68.20, 62.57, 56.42, 36.04, 13.80. MS (ESI):  $m/z$  Calcd for  $C_{19}H_{22}Cl_2NO_4$   $[M + H]^+$  398.09, found 398.1.

*Ethyl (2R,3S,4S)-4-acrylamido-5-(3',5'-dichloro-[1,1'-biphenyl]-4-yl)-2,3-dihydroxypentanoate (37, CW17)*. Compound **37** was synthesized using the same experimental procedure as compound **17**, except that compound **1** was replaced with compound **21**. Final product was 0.15 g at a yield of 59%.  $^1H$  NMR  $\delta$  H (400 MHz;  $CDCl_3$ ), 1.25 (3H, t), 3.09 (2H, m), 3.92 (1H, s), 4.20 (2H, m), 4.27 (1H, d), 5.35 (1H, s), 5.63 (1H, d), 6.07–6.14 (1H, m), 6.23 (1H, d), 6.43 (1H, d), 7.32 (3H, m), 7.41 (2H, d), 7.44 (2H, d).  $^{13}C$  NMR ( $CDCl_3$ ) 172.87, 166.58, 143.74, 138.11, 136.78, 135.23, 130.52, 129.95, 127.23, 127.14, 127.02, 125.42, 72.48, 71.54, 62.18, 53.02, 37.18, 14.05. MS (ESI):  $m/z$  Calcd for  $C_{22}H_{24}Cl_2NO_5$   $[M + H]^+$  452.10, found 452.1.

*Ethyl (2R,3S,4S)-4-(but-3-enamido)-5-(3',5'-dichloro-[1,1'-biphenyl]-4-yl)-2,3-dihydroxypentanoate (38, CW18)*. Compound **38** was synthesized using the same experimental procedure as compound **18**, except that compound **1** was replaced with compound **21**. Final product was 0.23 g at a yield of 85%.  $^1H$  NMR  $\delta$  H (400 MHz;  $CDCl_3$ ), 1.25 (3H, t), 1.79 (2H, m), 3.02 (2H, m), 3.91 (1H, m), 4.17–4.27 (2H, m), 4.31 (1H, d), 5.31 (1H, s), 5.77 (1H, t), 6.20 (1H, m), 6.78 (1H, m), 7.30 (3H, m), 7.39 (2H, s), 7.43 (2H, d).  $^{13}C$  NMR ( $CDCl_3$ ) 172.95, 167.31, 143.71, 141.22, 138.09, 136.75, 135.23, 129.92, 127.25, 127.14, 125.39, 124.52, 72.79, 71.58, 62.18, 52.95, 37.16, 17.78, 14.05. MS (ESI):  $m/z$  Calcd for  $C_{23}H_{26}Cl_2NO_5$   $[M + H]^+$  466.12, found 466.1.

*(2R,3S,4S)-4-acrylamido-5-(3',5'-dichloro-[1,1'-biphenyl]-4-yl)-2,3-dihydroxypentanoic acid (39, CW19)*. Compound **39** was synthesized using the same experimental procedure as compound **19**, except that compound **1** was replaced with compound **21**. Final product was 0.10 g at a yield of 68%. NMR  $\delta$  H (400 MHz;  $CDCl_3$ ), 3.01–3.20 (2H, m), 4.13–4.21 (1H, m), 4.43 (2H, s), 5.56 (1H, d), 6.08–6.17 (2H, m), 7.22 (3H, d), 7.27–7.39 (4H, m).  $^{13}C$  NMR (MeOD) 176.19, 169.19, 149.02, 139.56, 138.87, 134.97, 129.79, 127.72, 126.46, 125.39, 124.94, 124.34,

74.18, 73.42, 54.92, 37.45. MS (ESI):  $m/z$  Calcd for  $C_{20}H_{20}Cl_2NO_5$   $[M + H]^+$  424.07, found 424.1.

(2*R*,3*S*,4*S*)-4-(*but*-3-enamido)-5-(3',5'-dichloro-[1,1'-biphenyl]-4-yl)-2,3-dihydroxypentanoic acid (**40**, **CW20**). Compound **40** was synthesized using the same experimental procedure as compound **20**, except that compound **1** was replaced with compound **21**. Final product was 0.14 g at a yield of 64%. NMR  $\delta$  H (400 MHz;  $CDCl_3$ ), 1.68 (2H, t), 2.83–3.04 (2H, m), 3.20 (1H, s), 4.01 (1H, d), 4.37 (2H, d), 5.72–5.82 (1H, m), 6.61–6.78 (2H, m), 7.20 (3H, m), 7.23 (2H, s), 7.28 (2H, d).  $^{13}C$  NMR ( $CDCl_3$ ) 175.19, 168.26, 143.41, 137.67, 136.69, 136.54, 135.16, 129.76, 127.08, 125.21, 125.12, 123.88, 73.54, 71.73, 52.75, 36.96, 17.81. MS (ESI):  $m/z$  Calcd for  $C_{21}H_{22}Cl_2NO_5$   $[M + H]^+$  438.09, found 438.1.

$^1\text{H}$  and  $^{13}\text{C}$  NMR spectra of compounds **2-20, 22-40**



## Compound 2

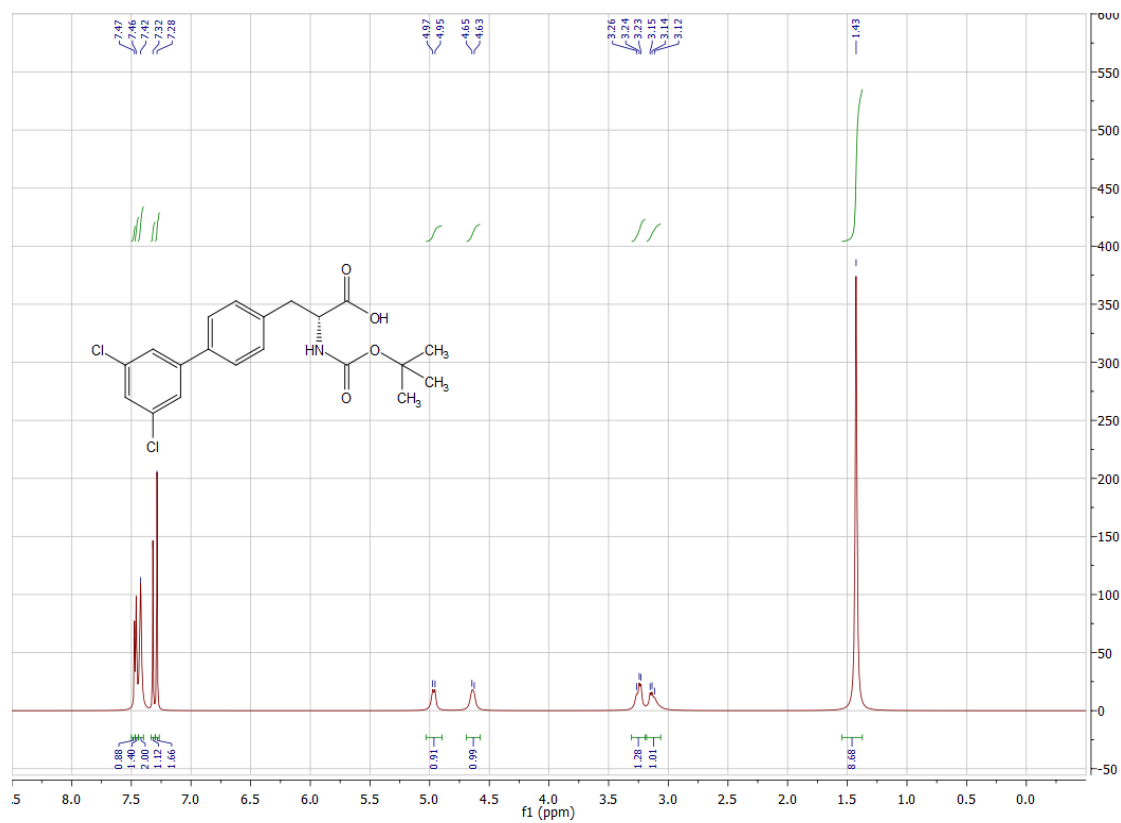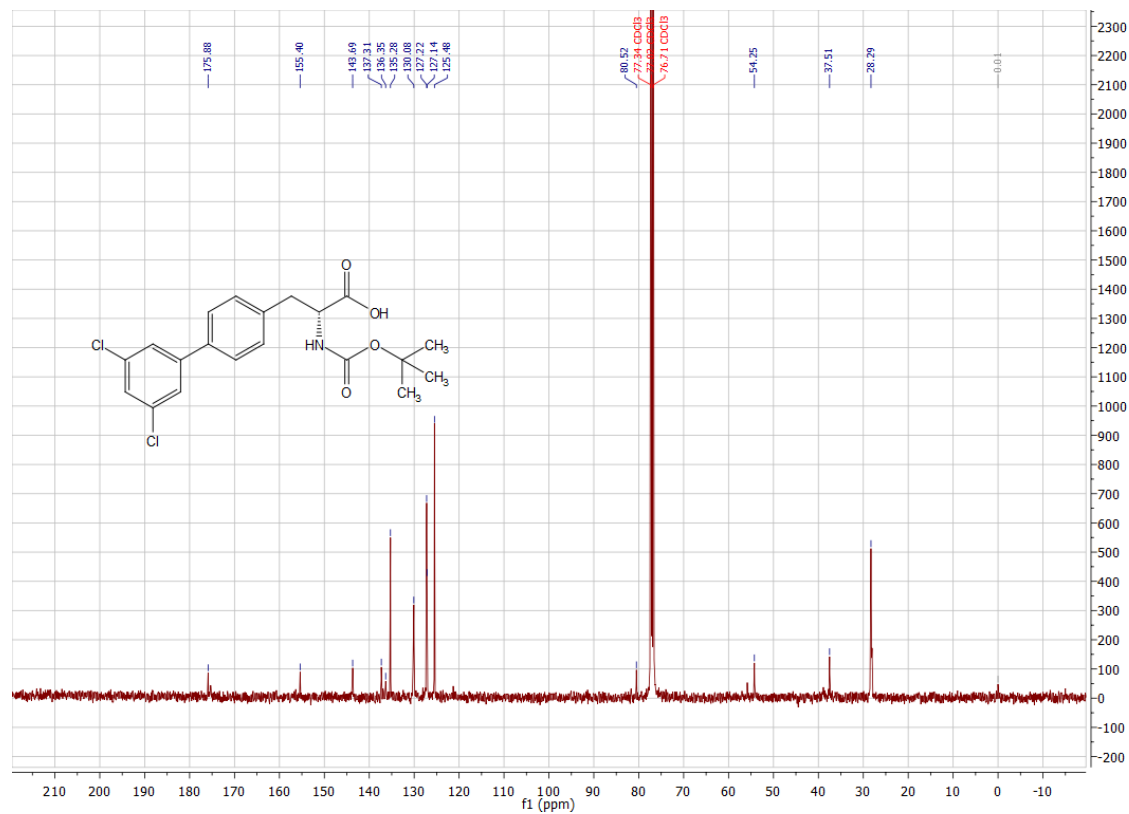

# Compound 3

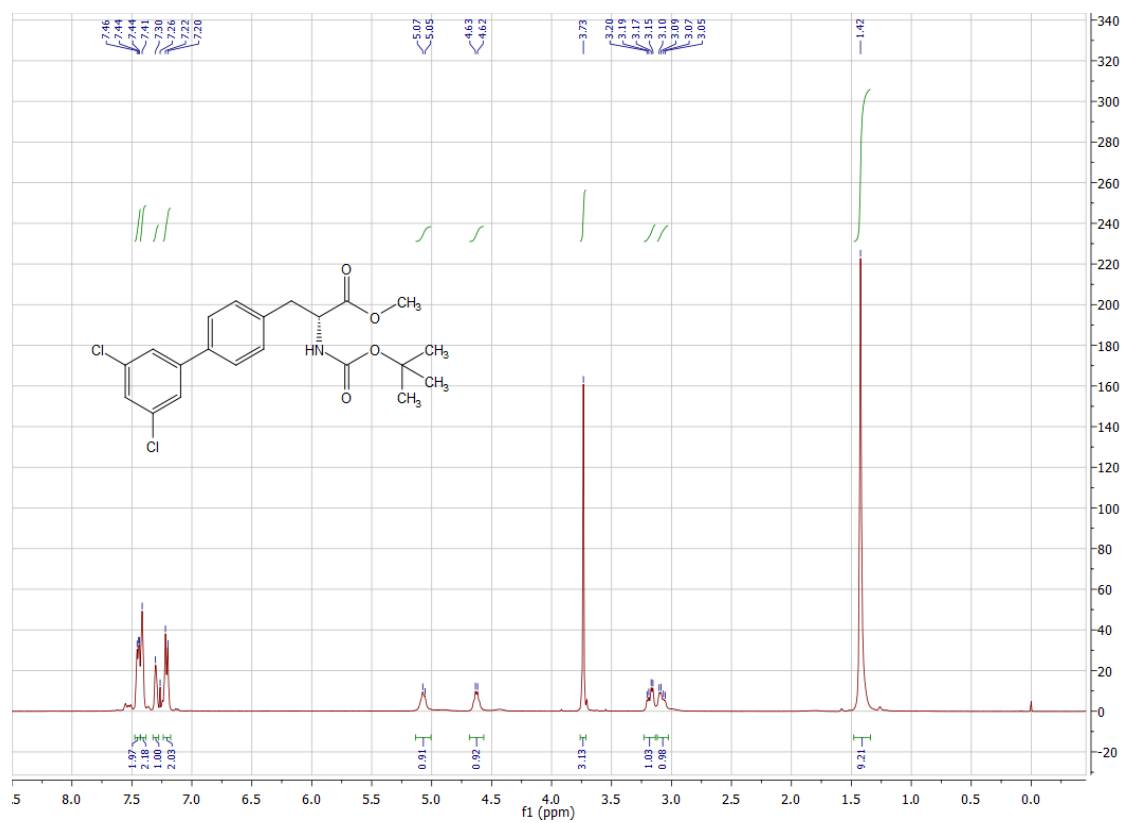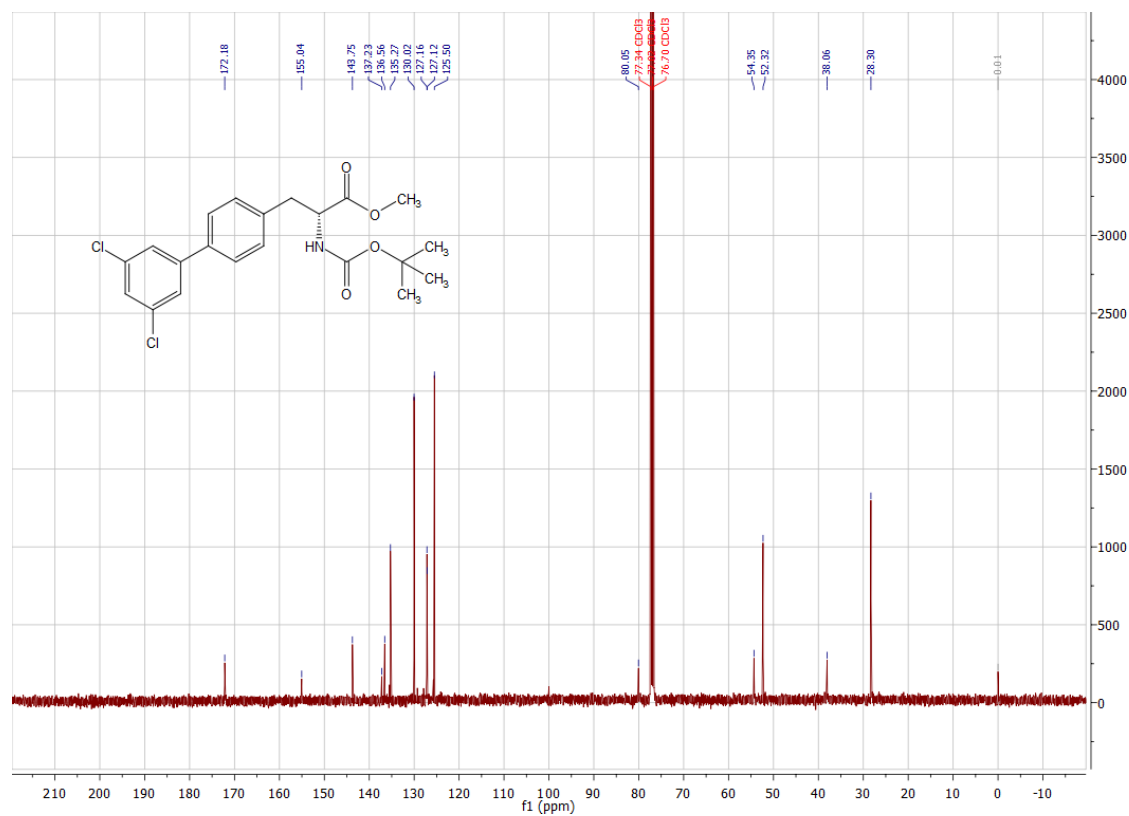

# Compound 4

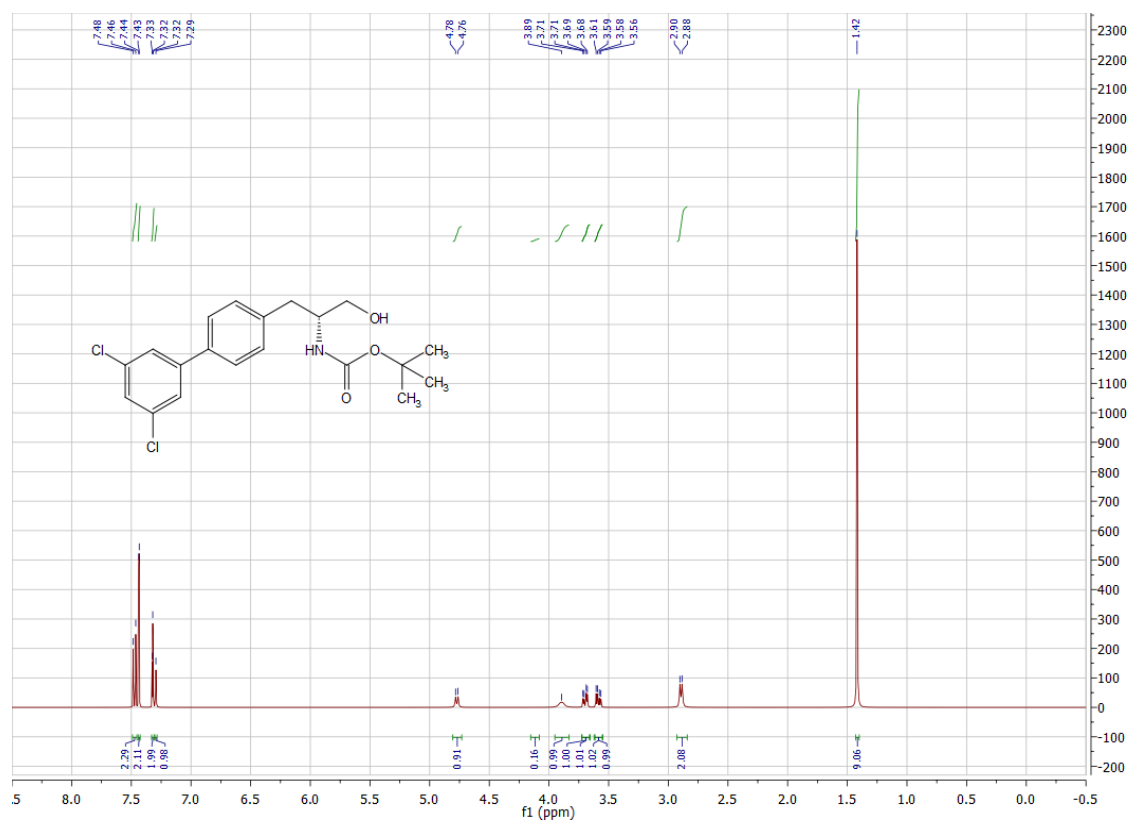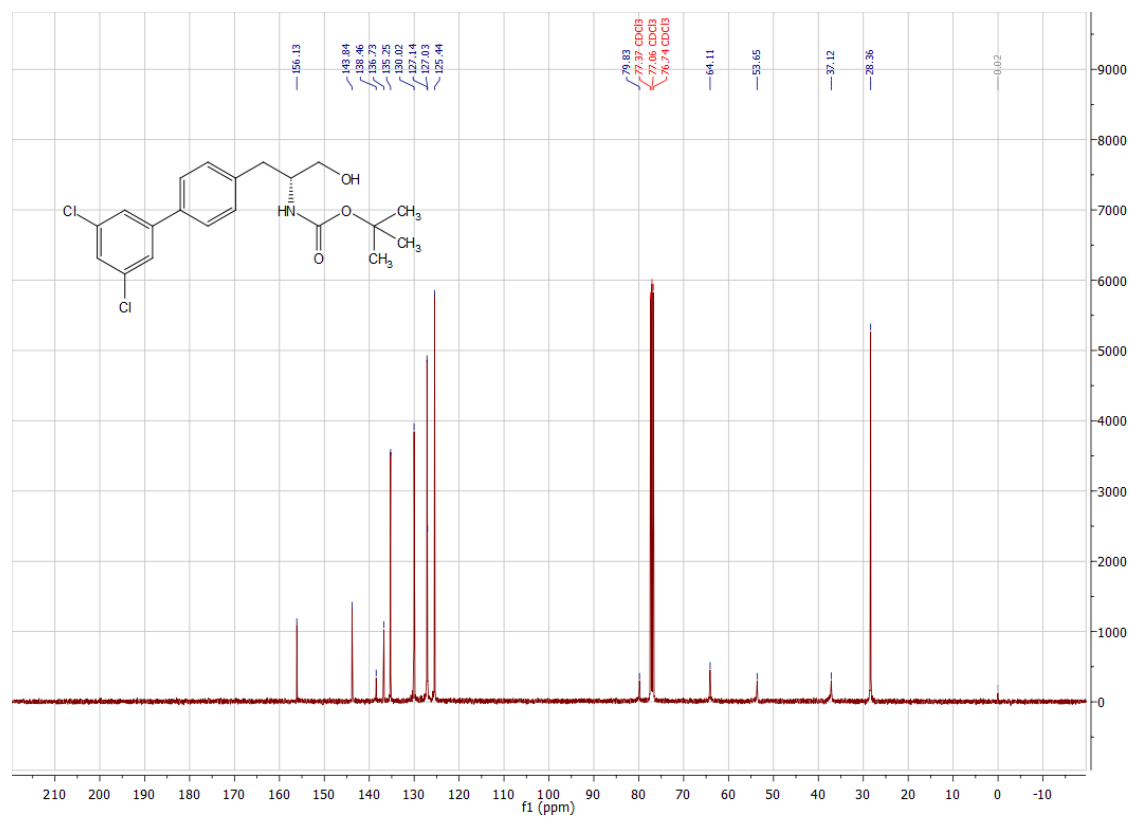

# Compound 5

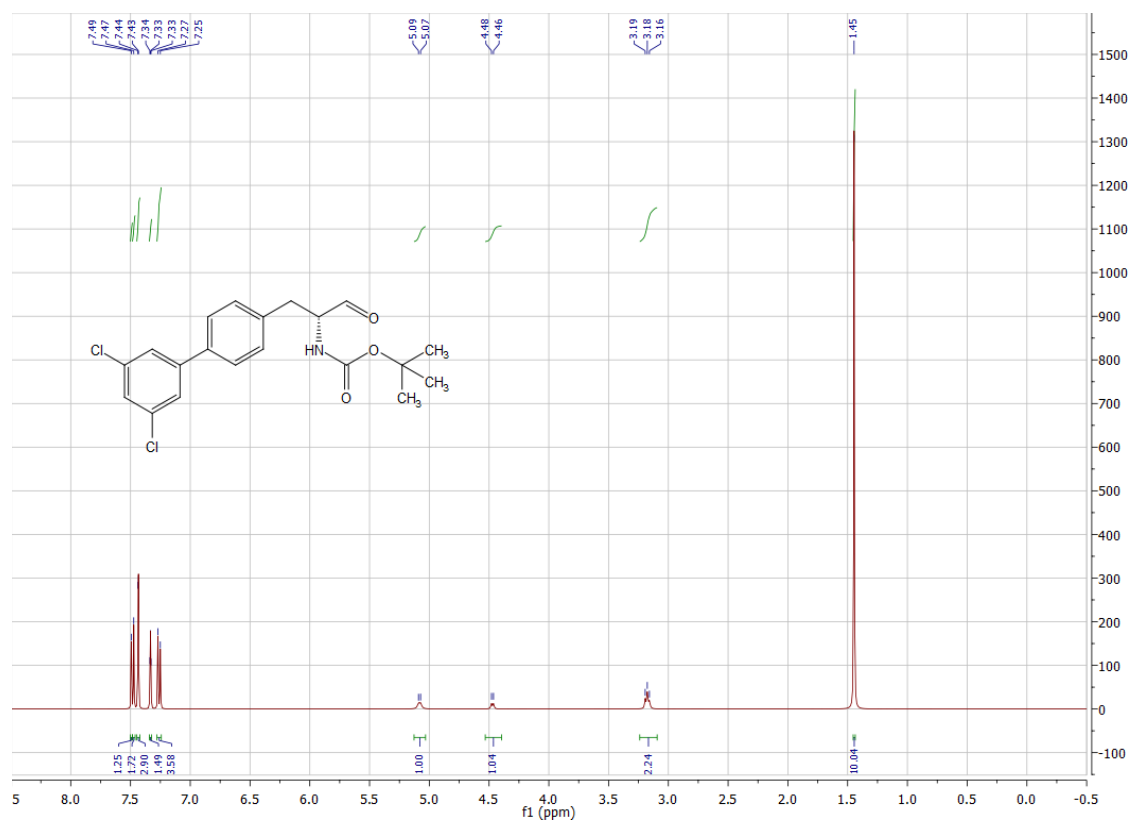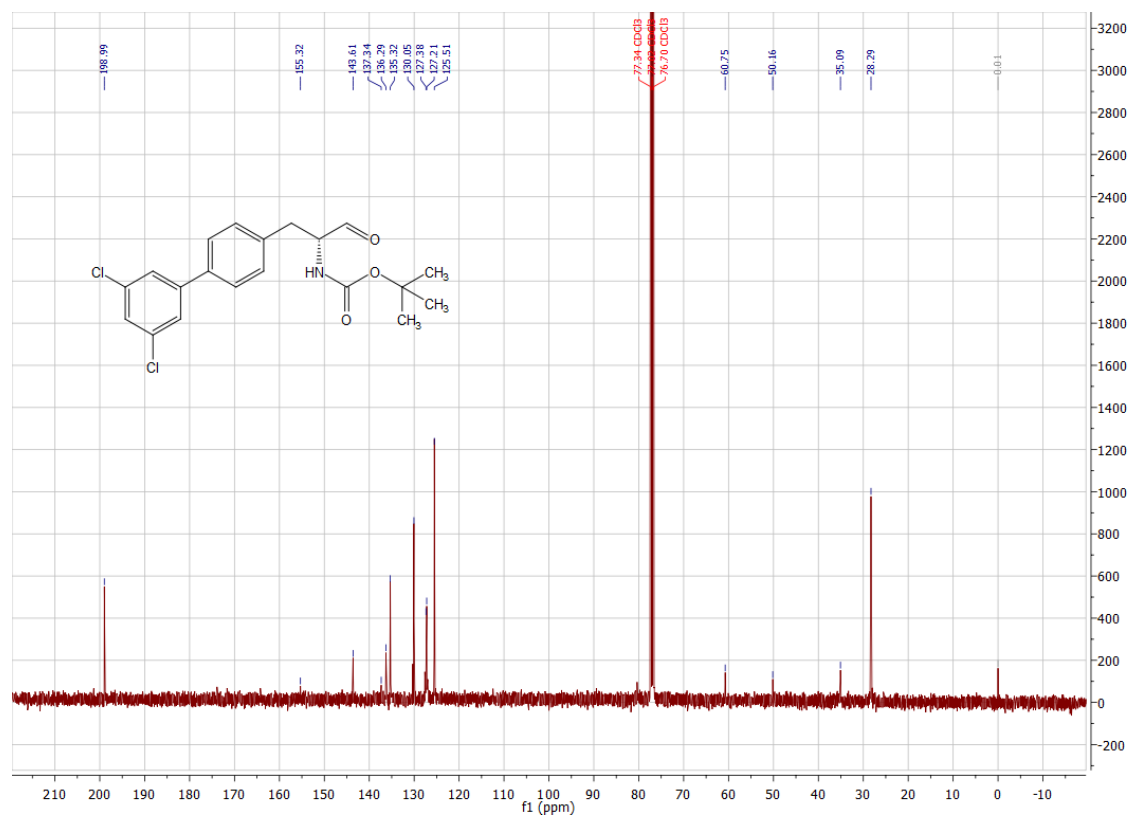

# Compound 6

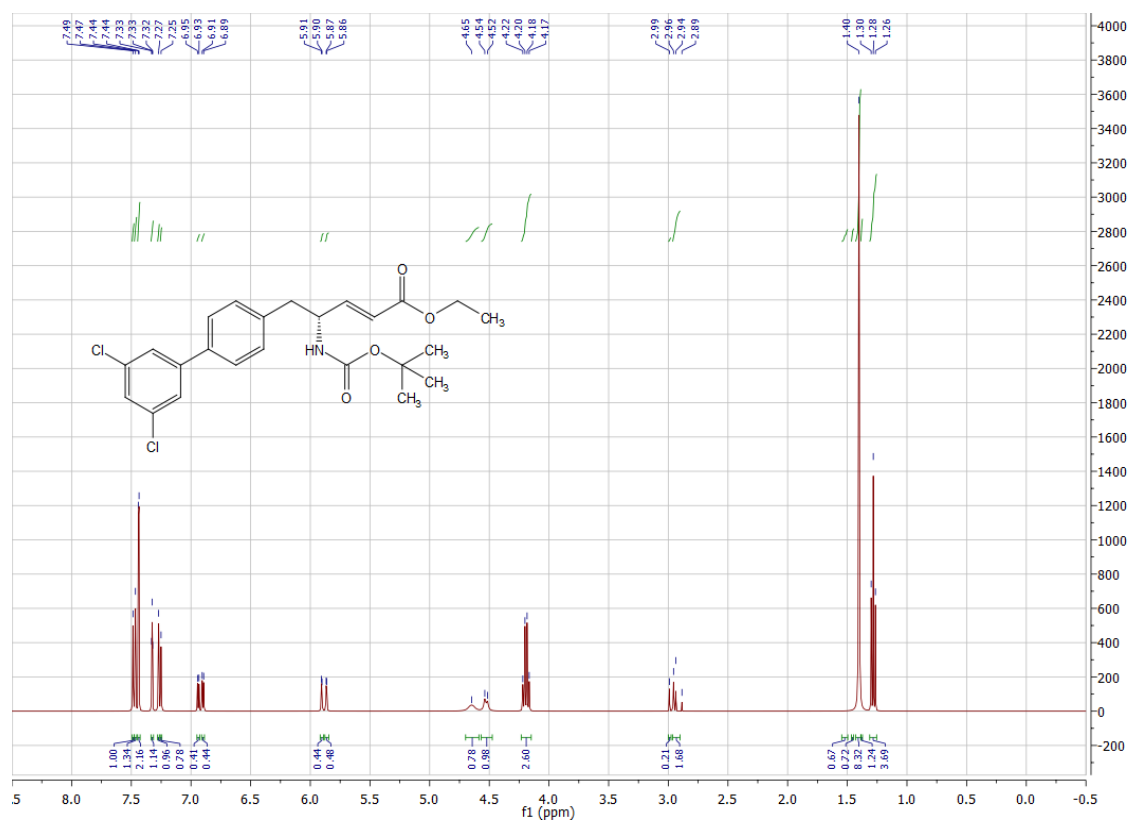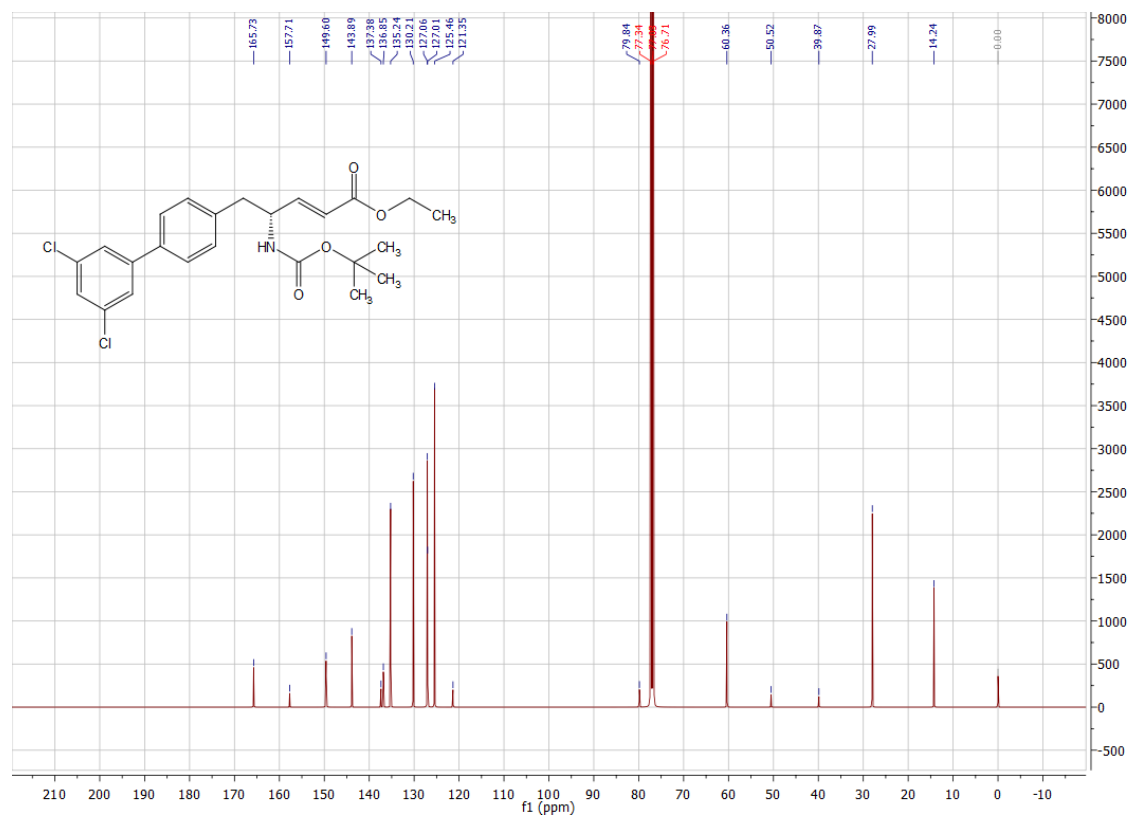

# Compound 7

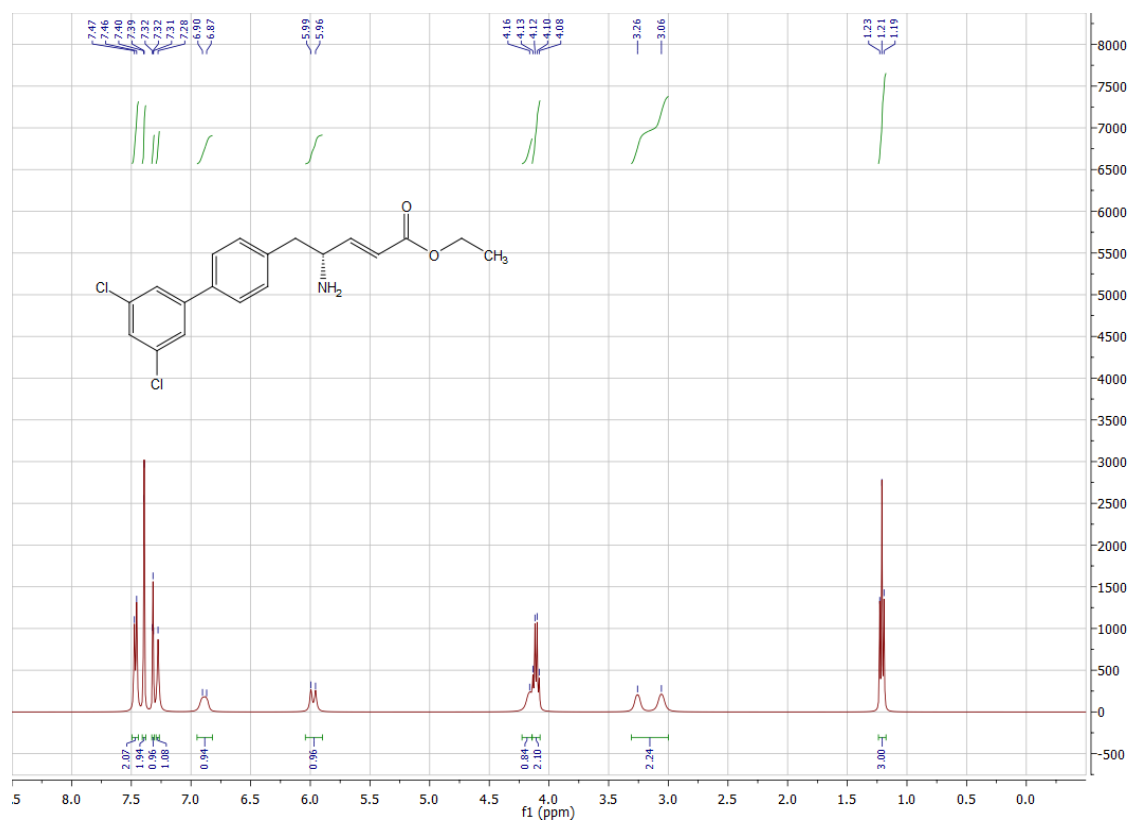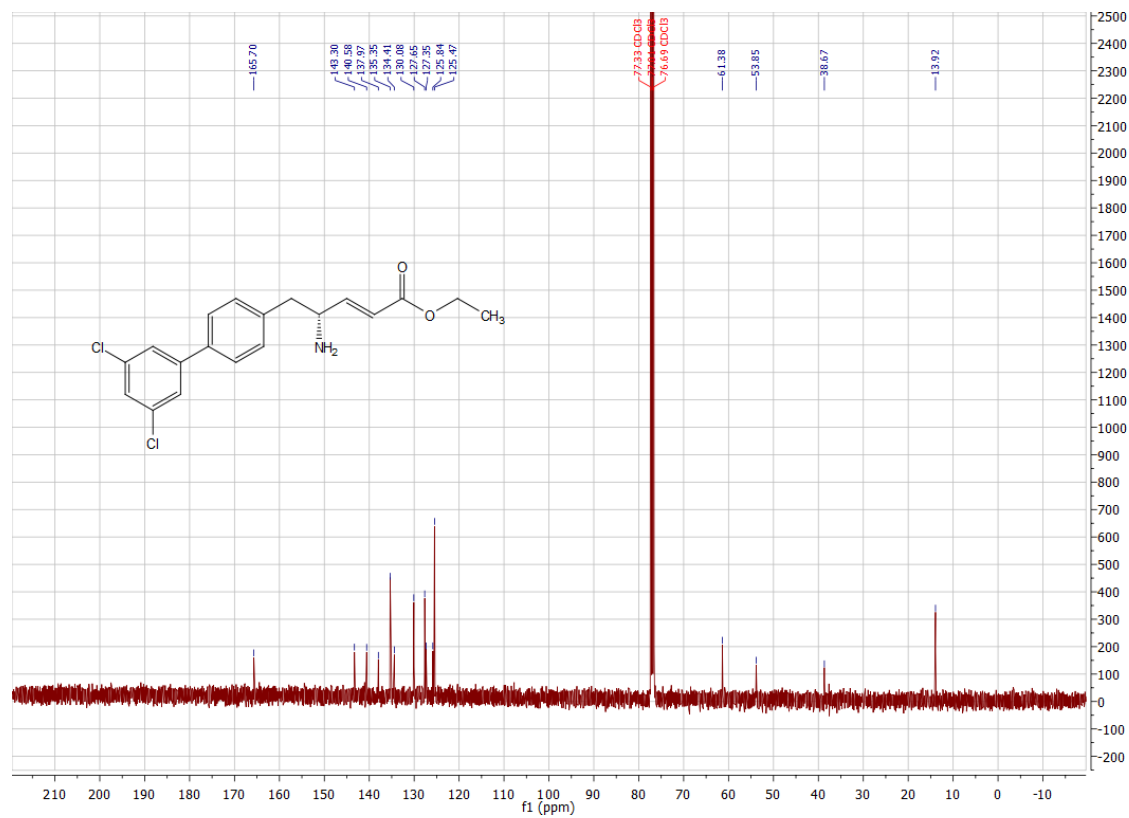

Compound **8** (CW3)

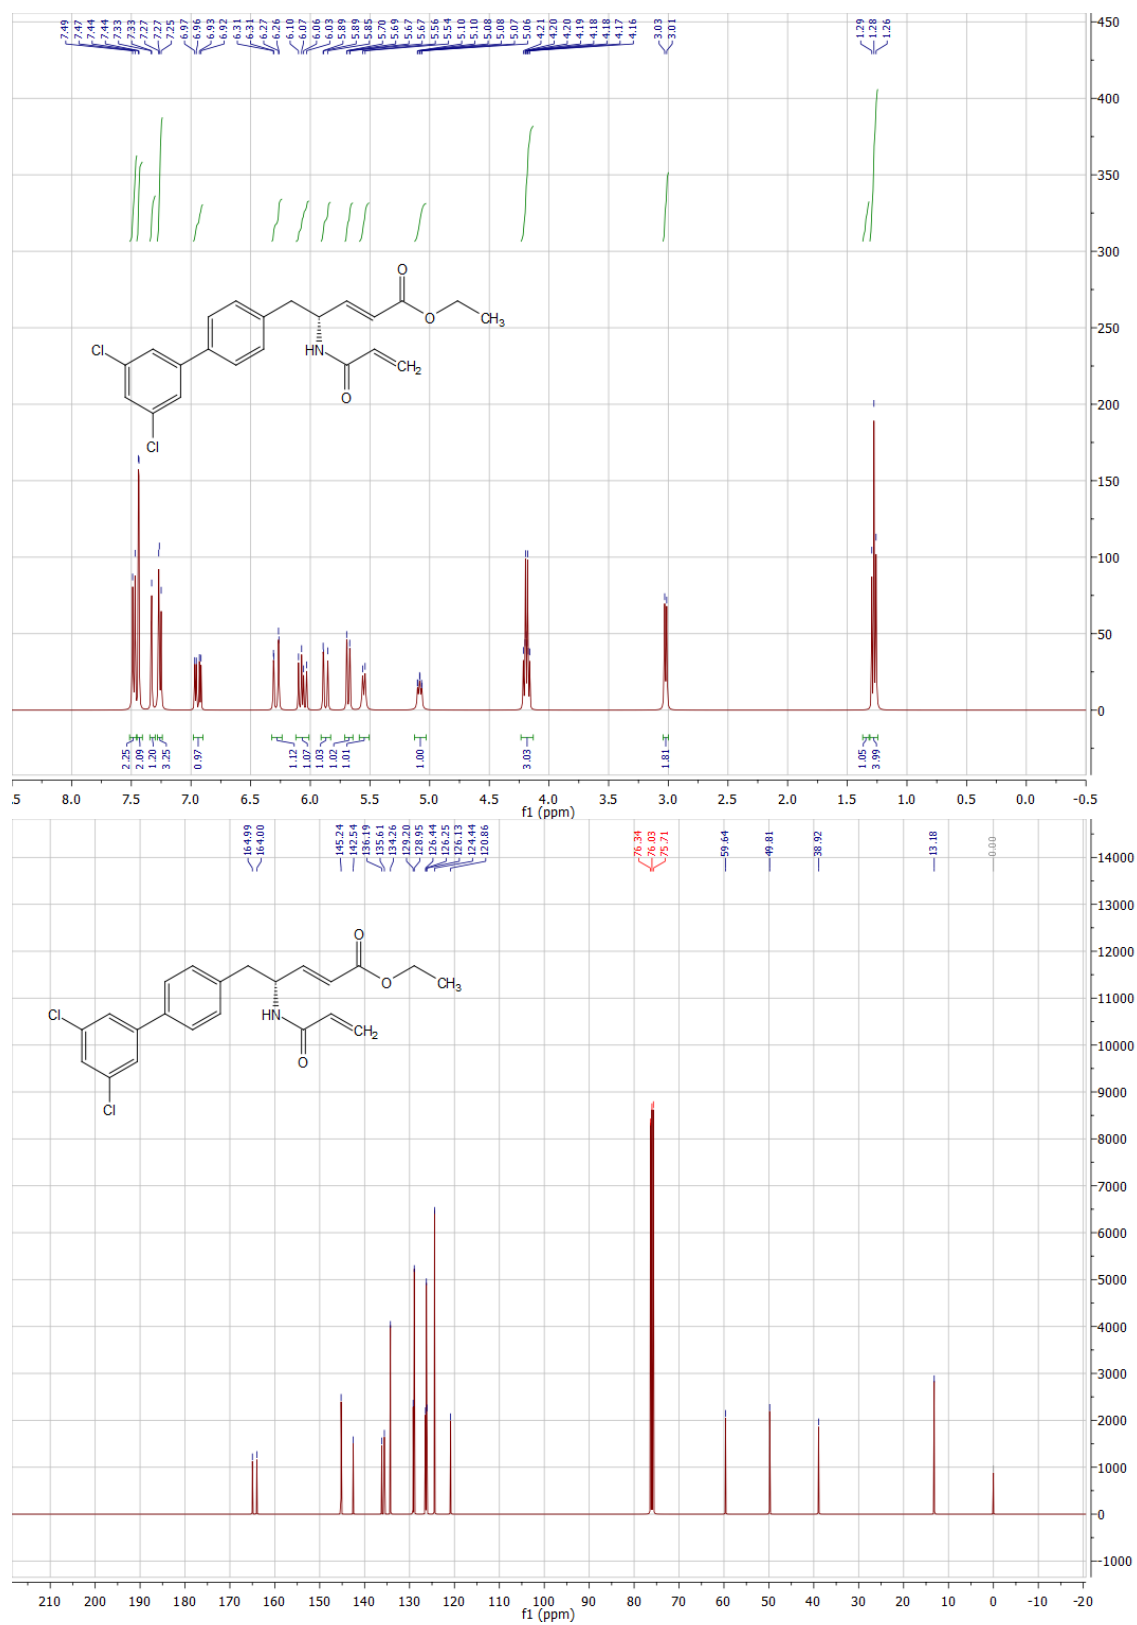

Compound **9** (CW4)

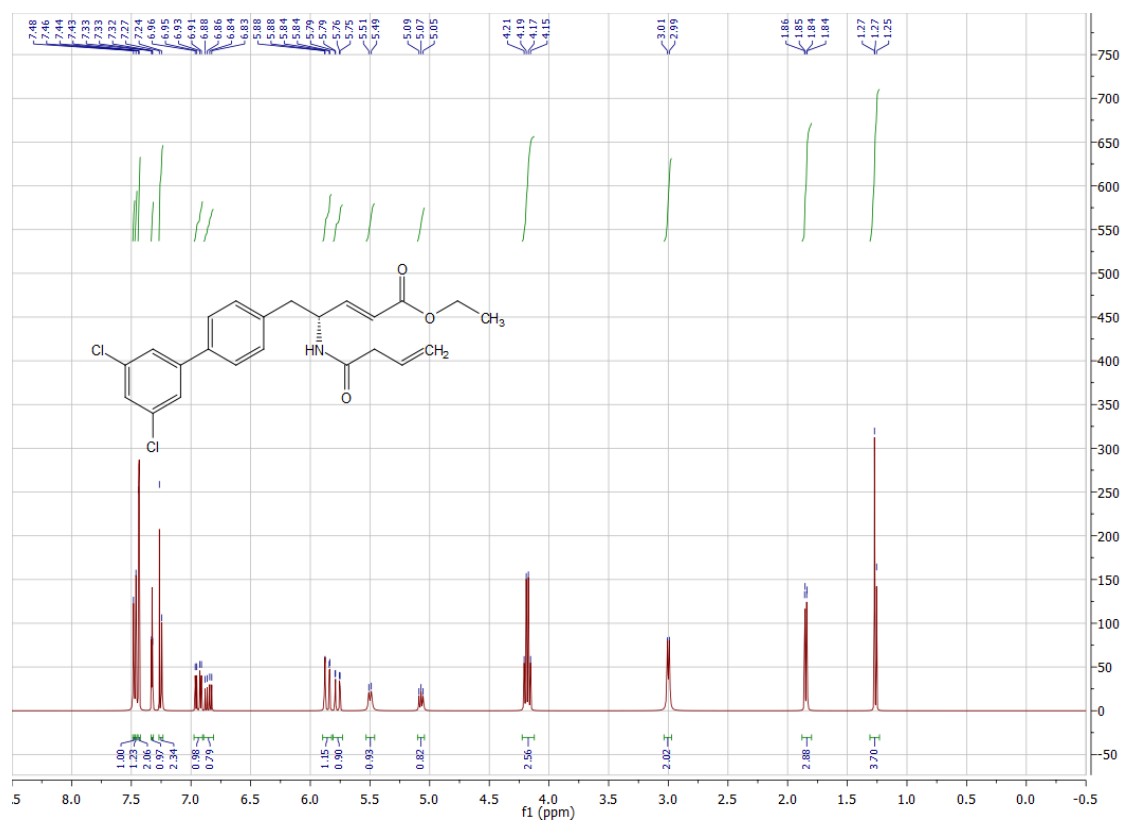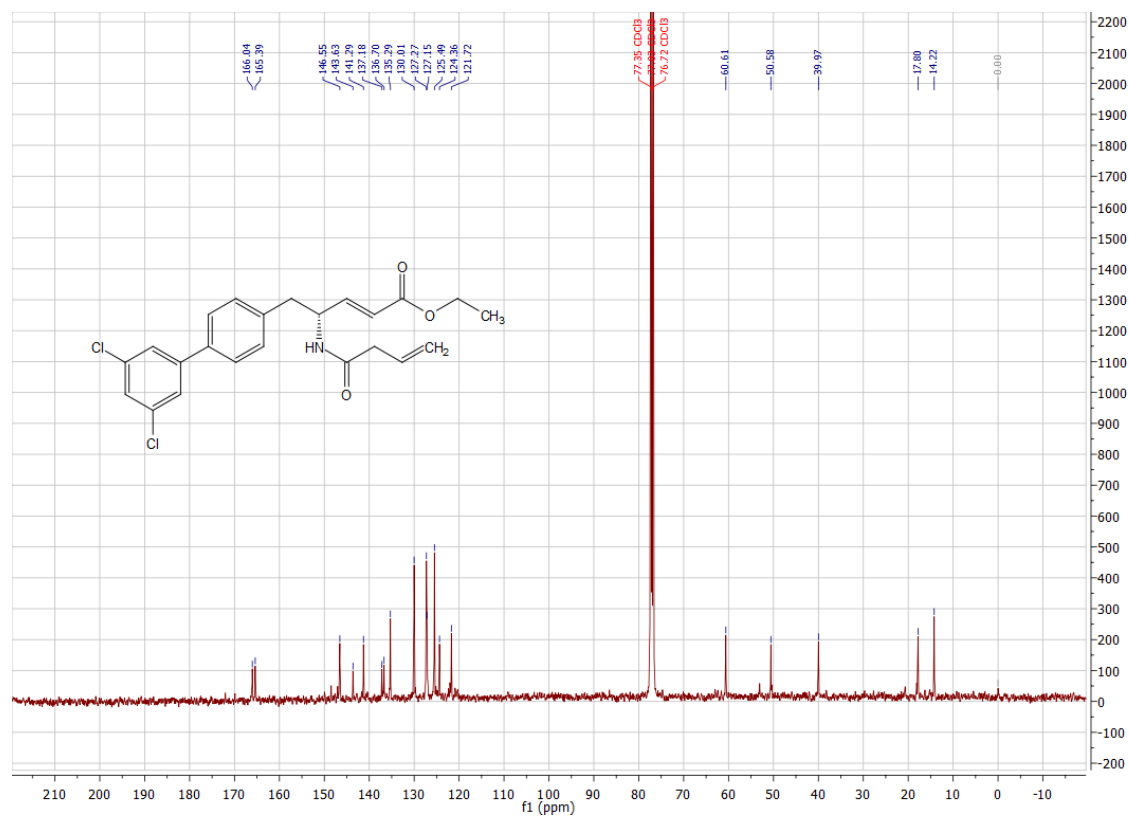



Compound **10** (CW5)

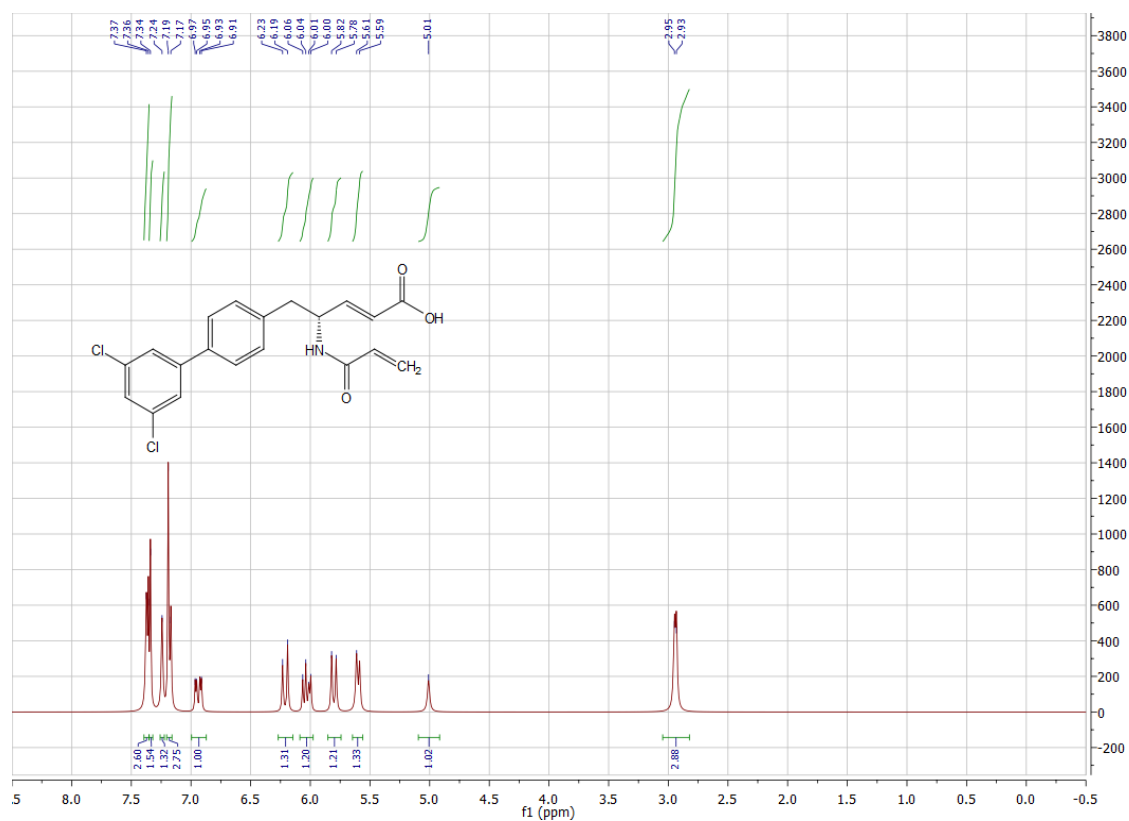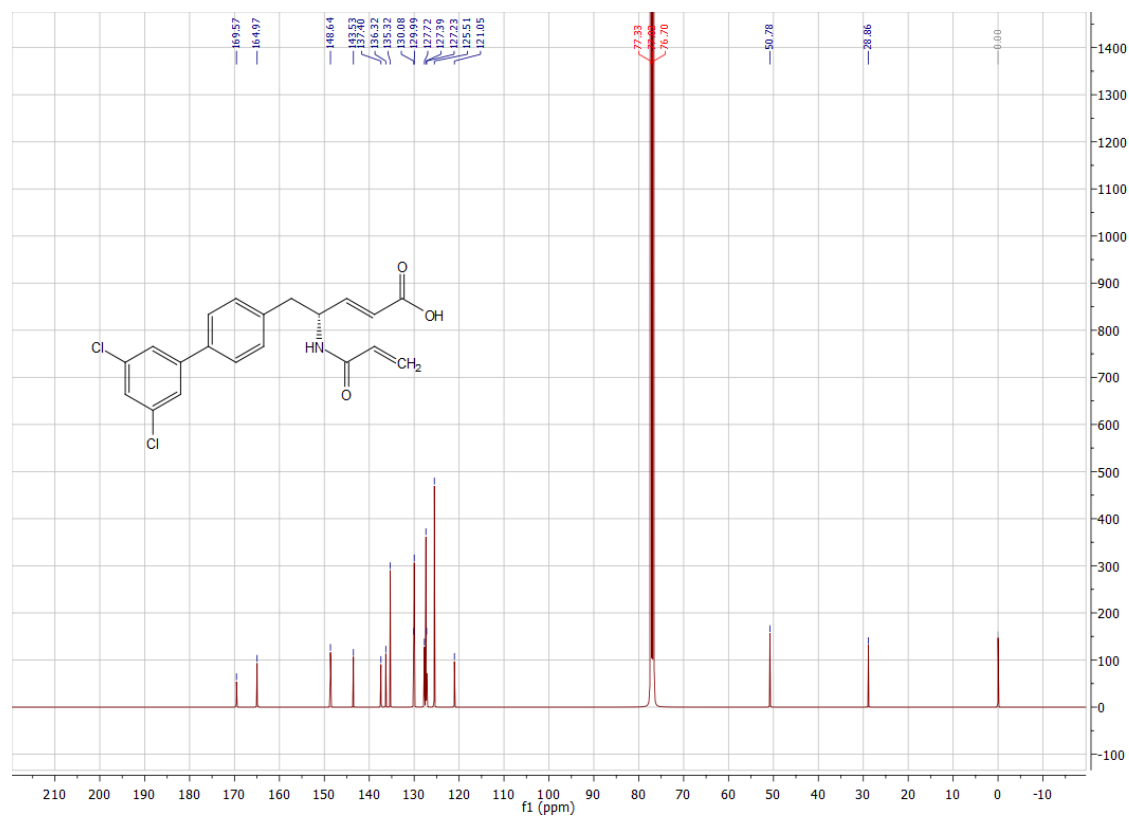

Compound **11** (CW6)

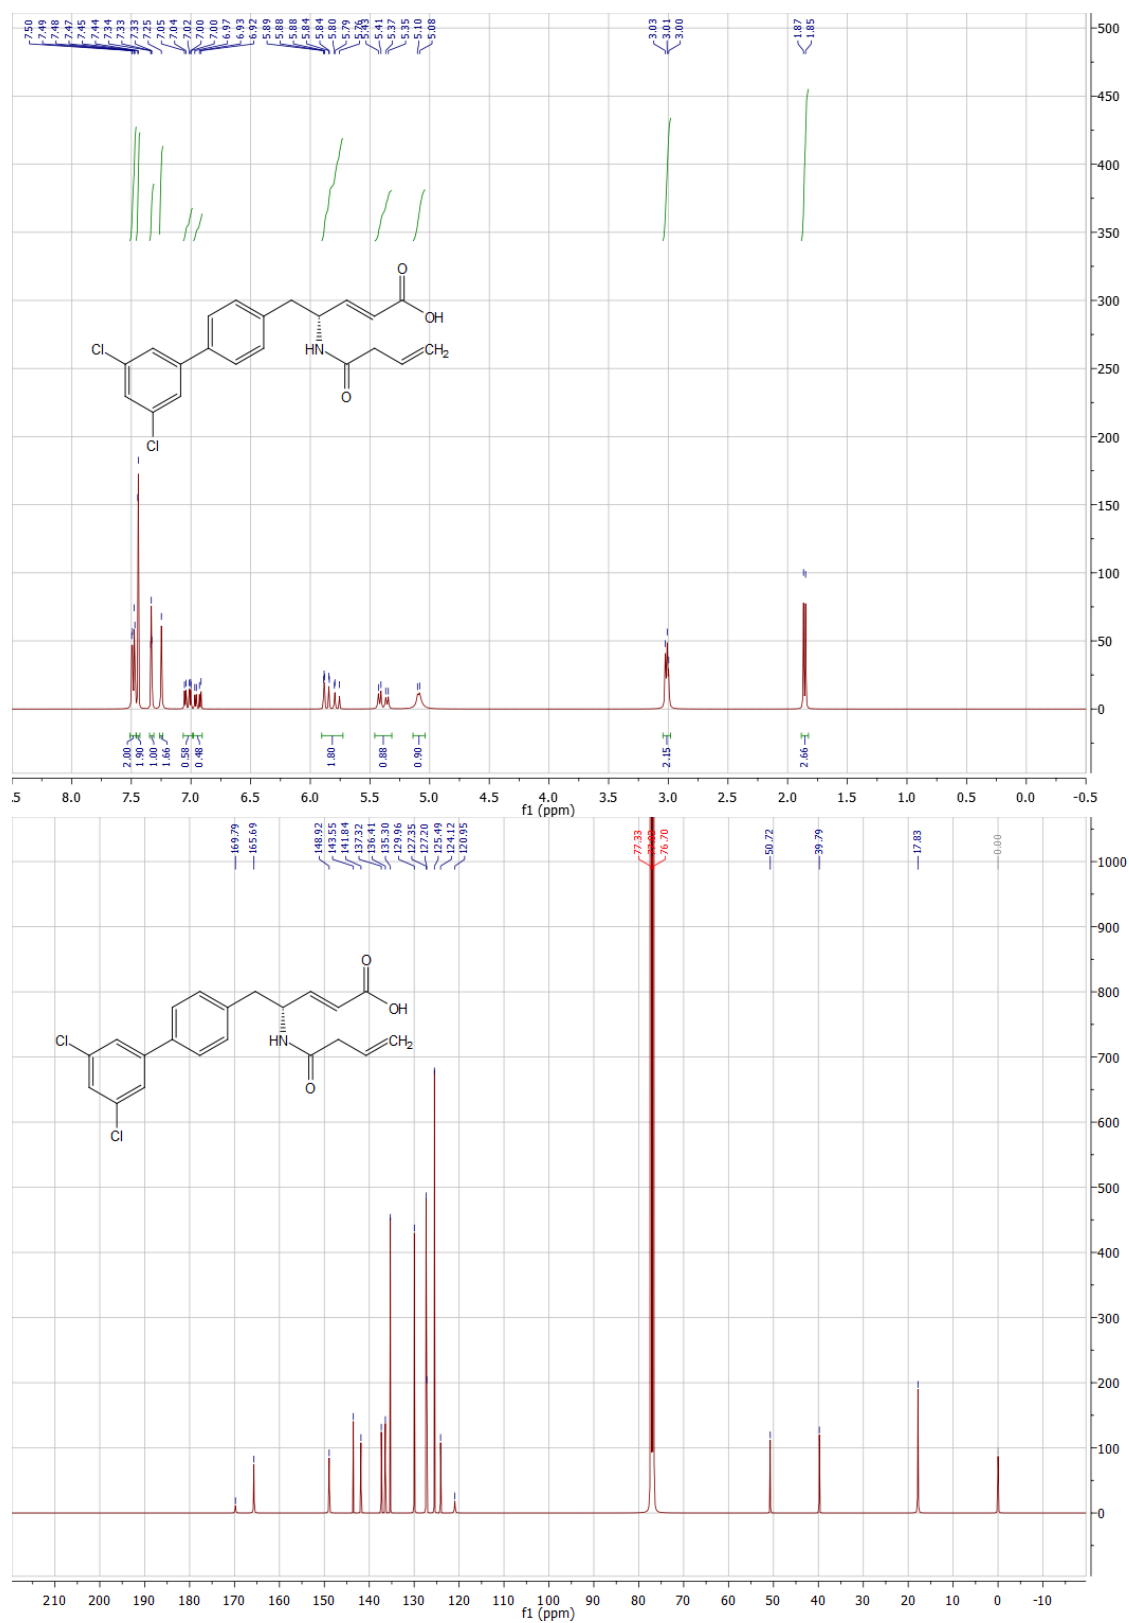

Compound 12

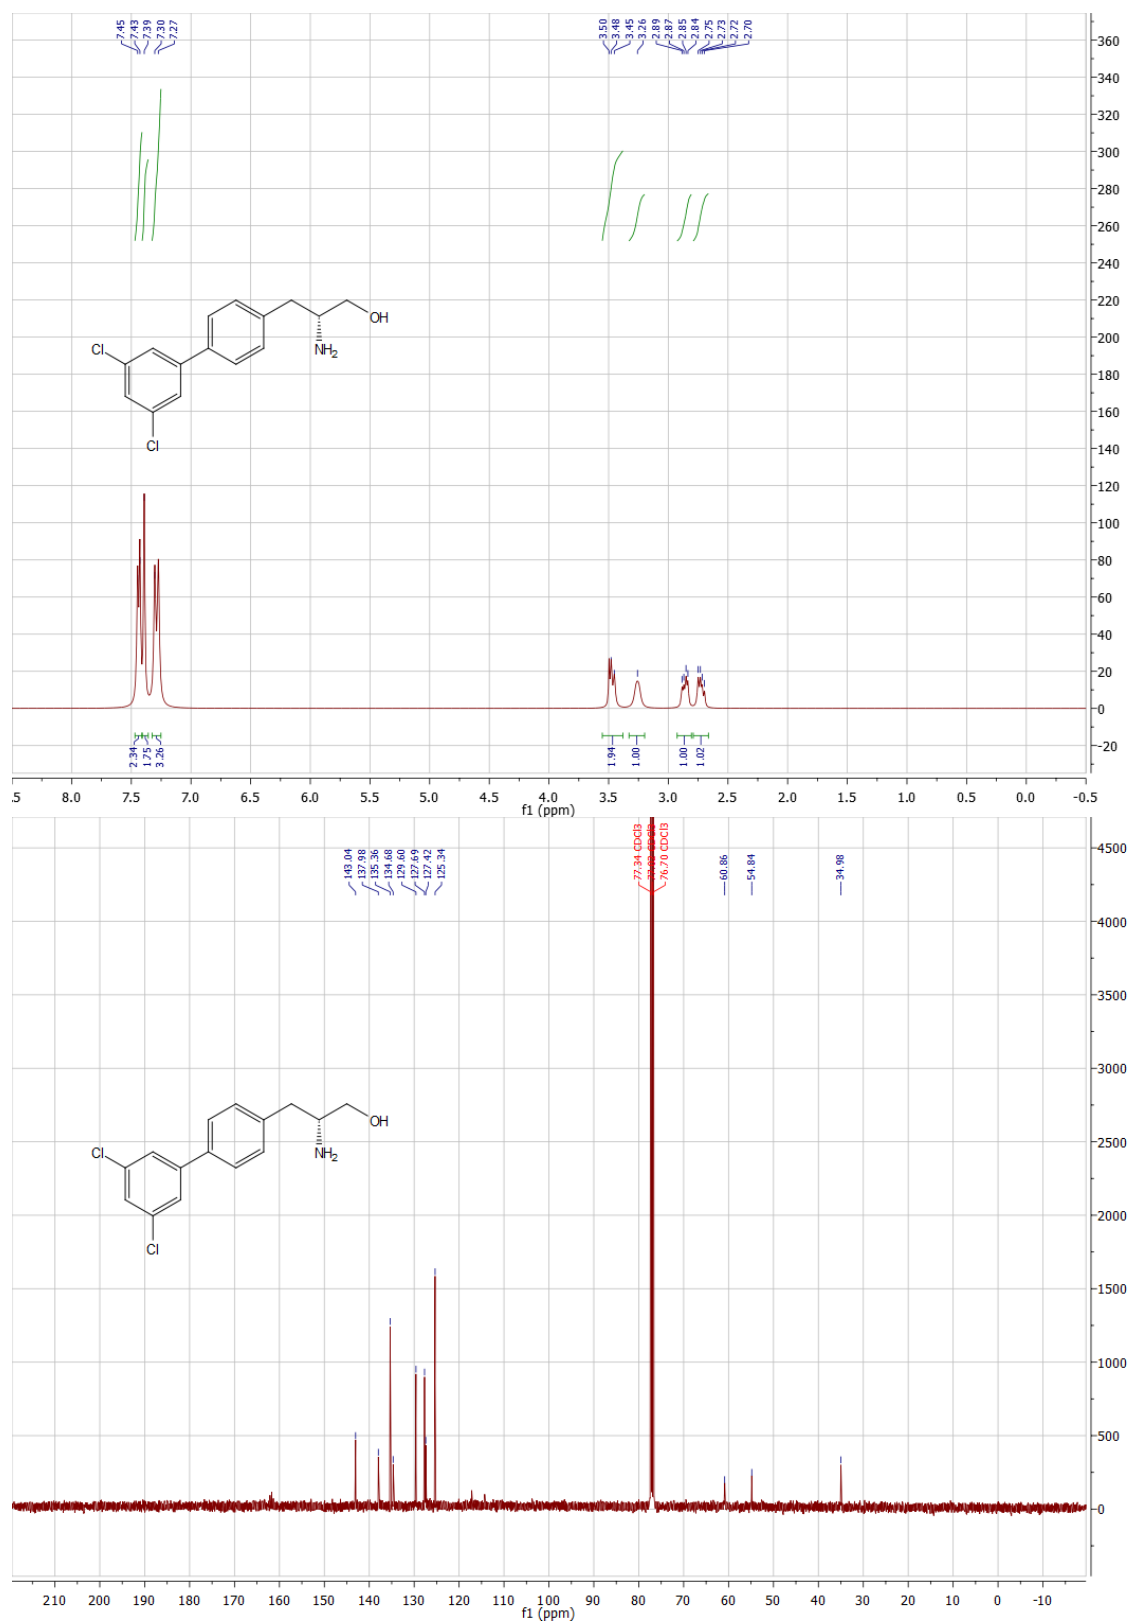

Compound **13** (CW1)

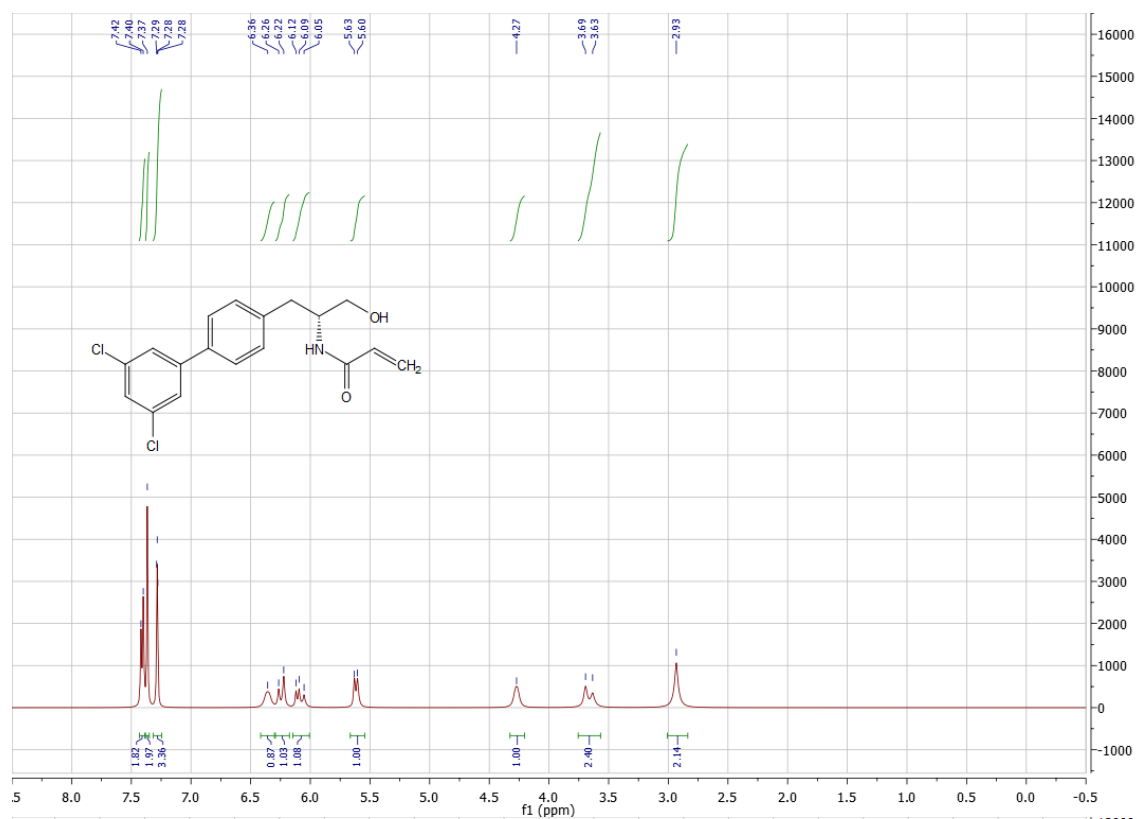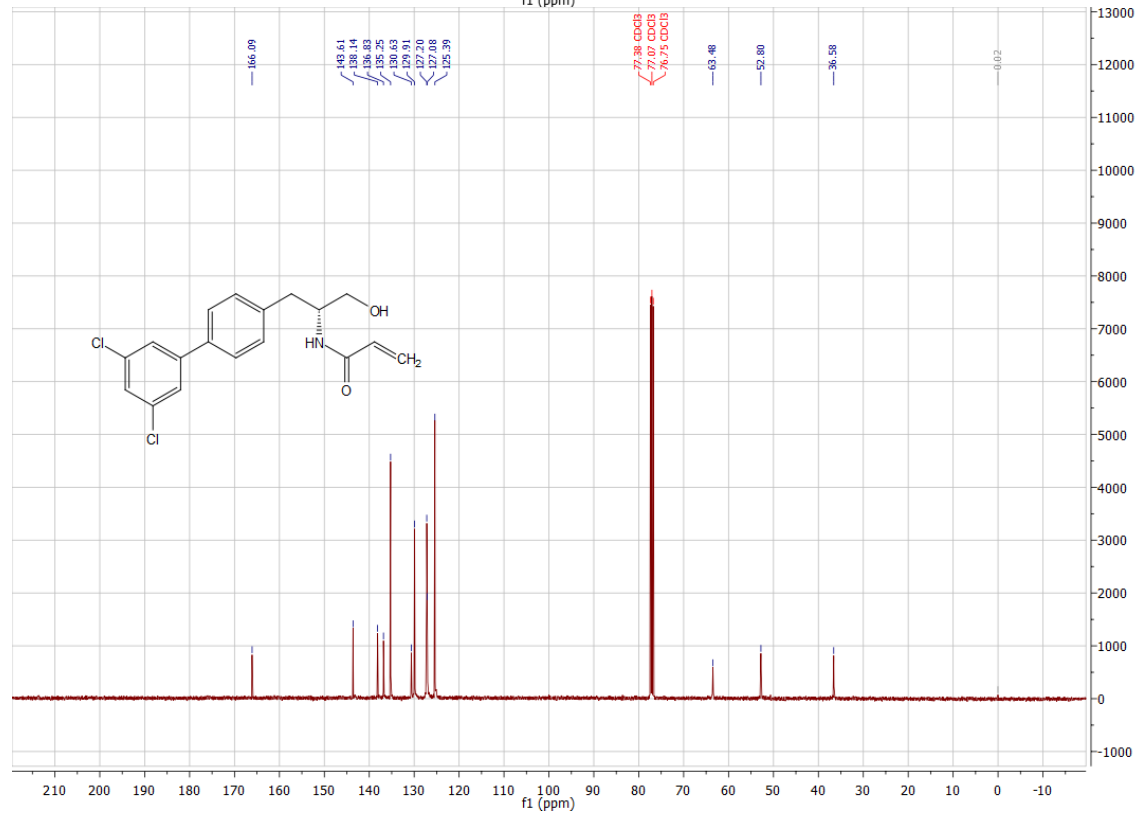

Compound **14** (CW2)

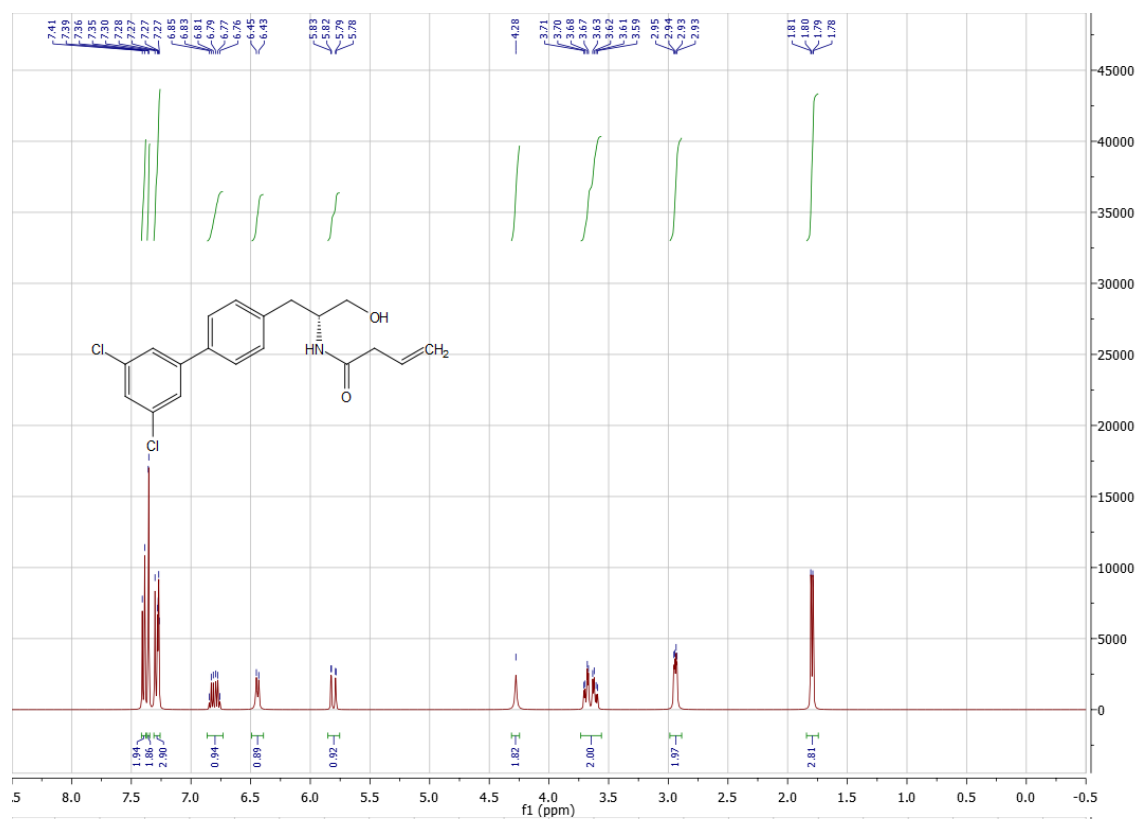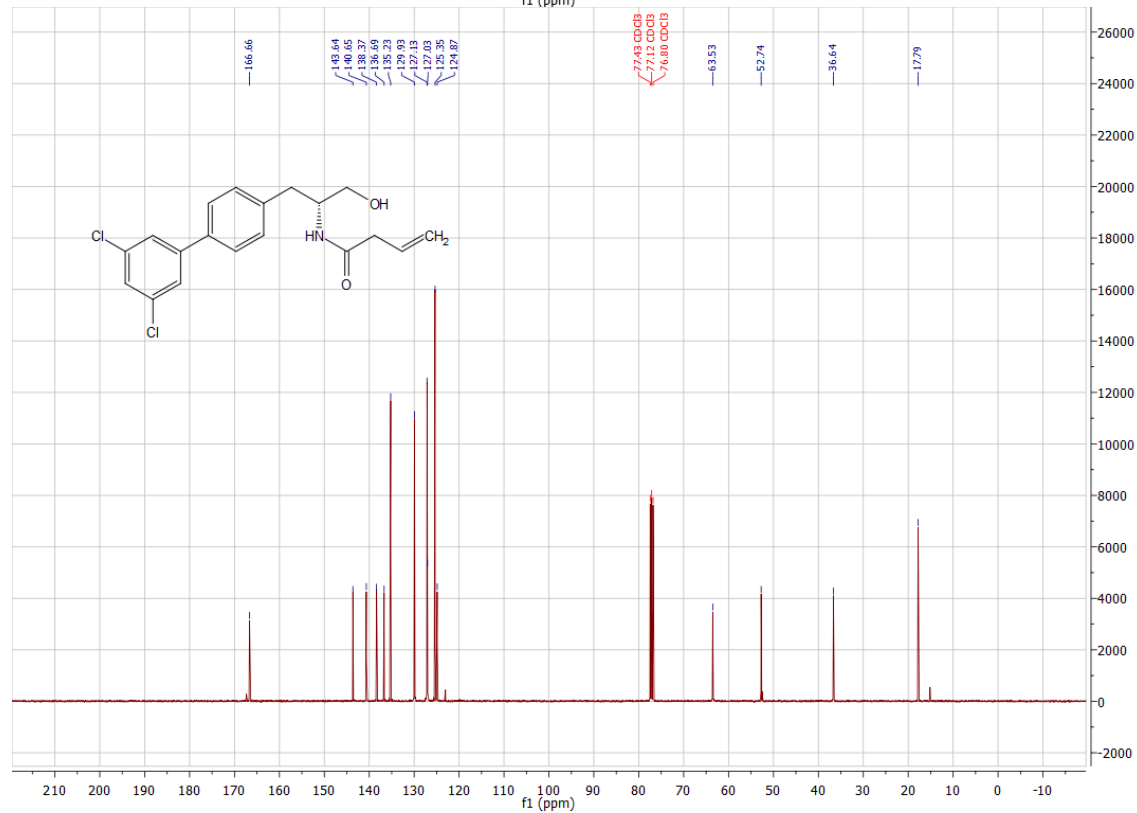

# Compound 15

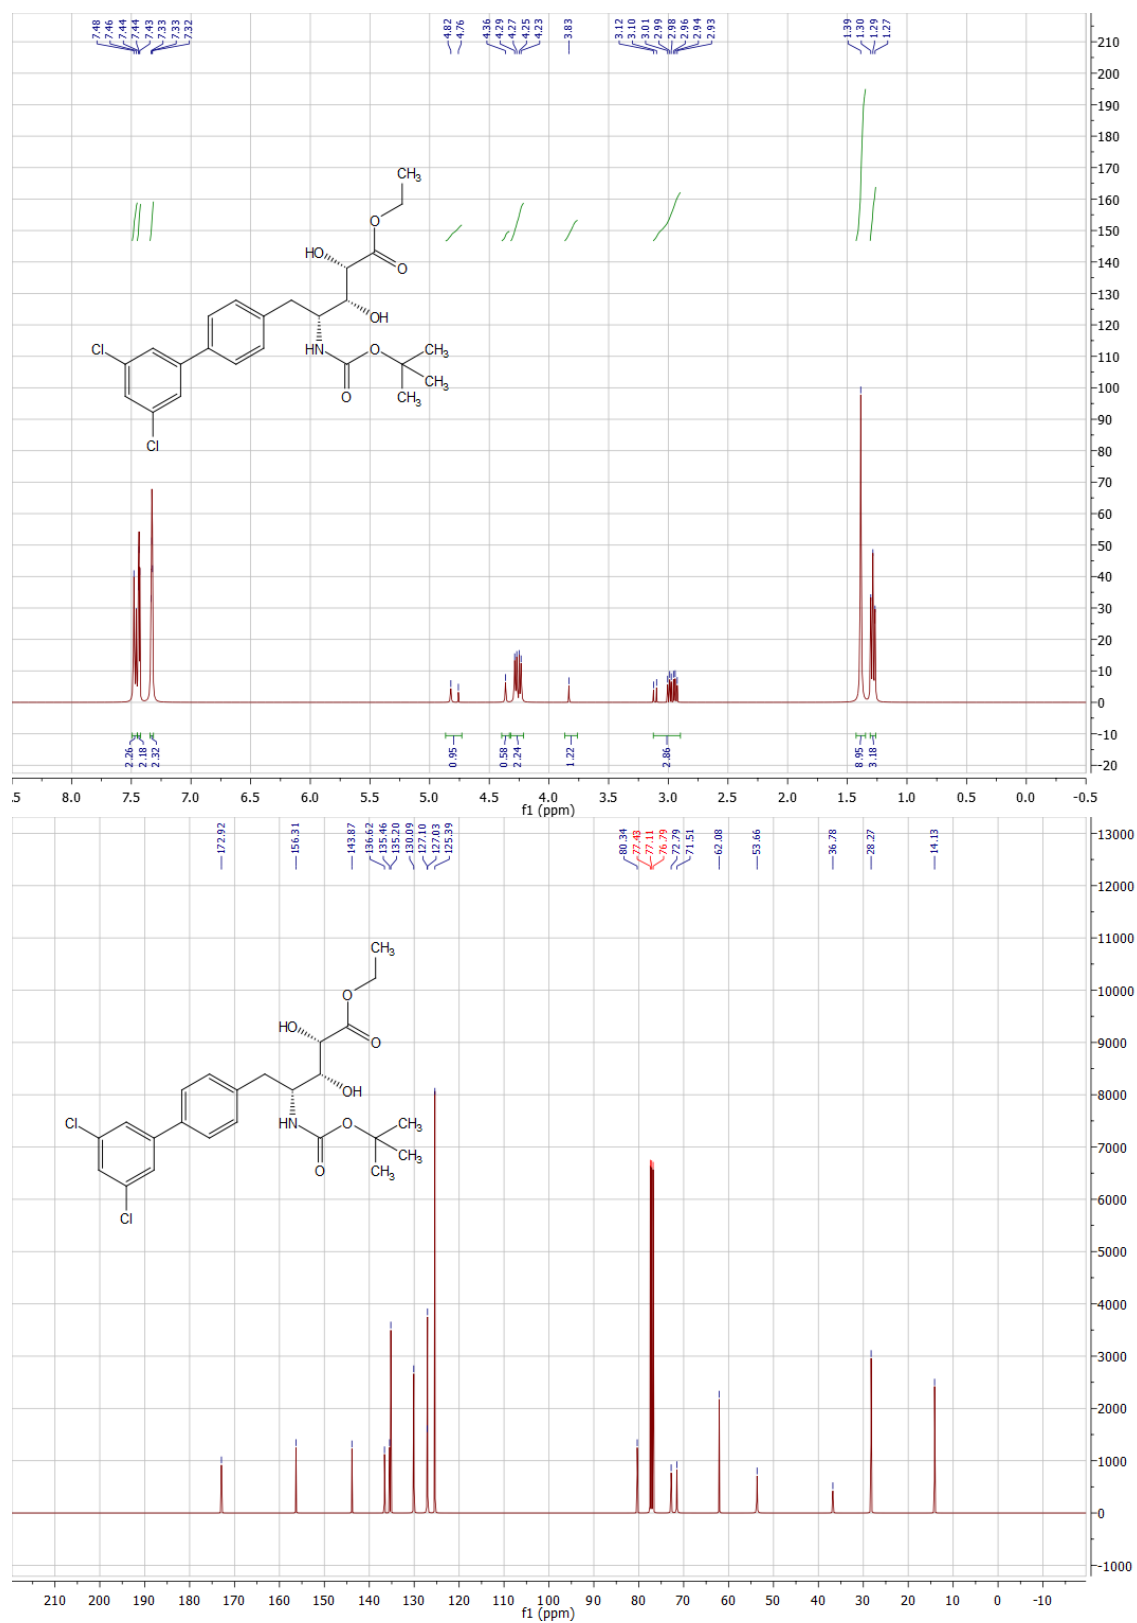

# Compound 16

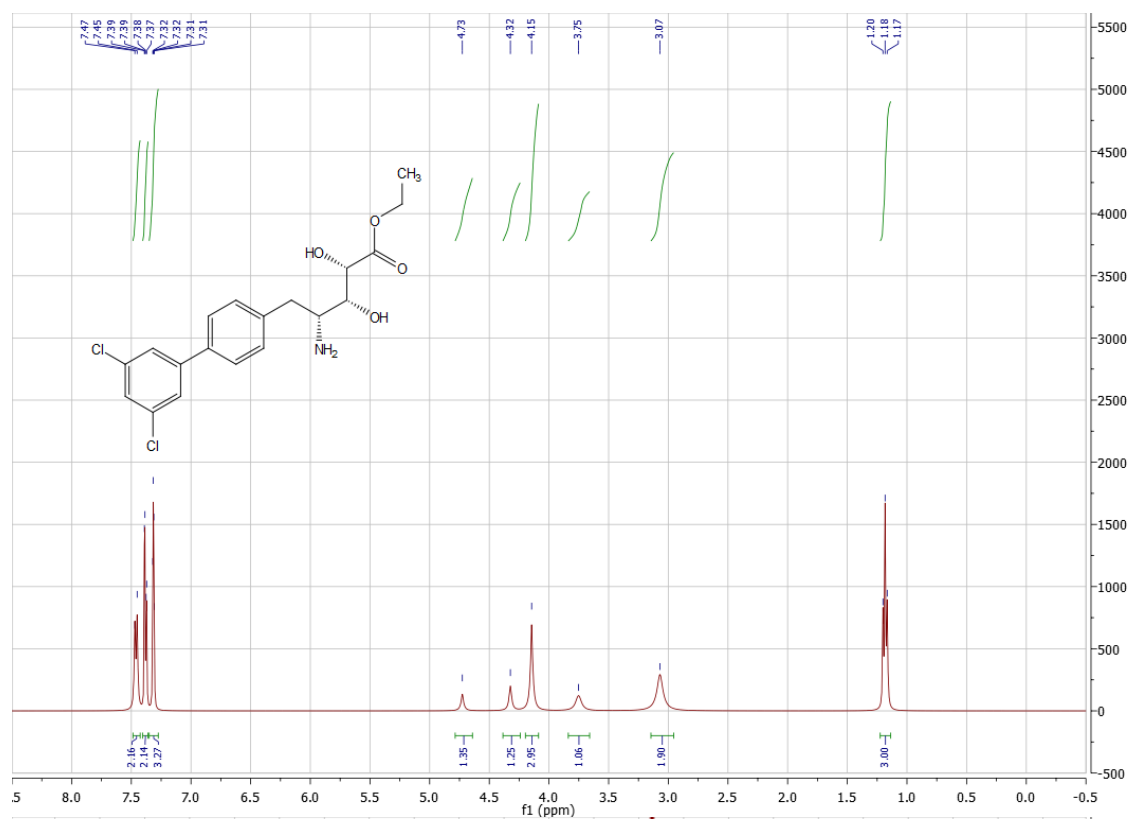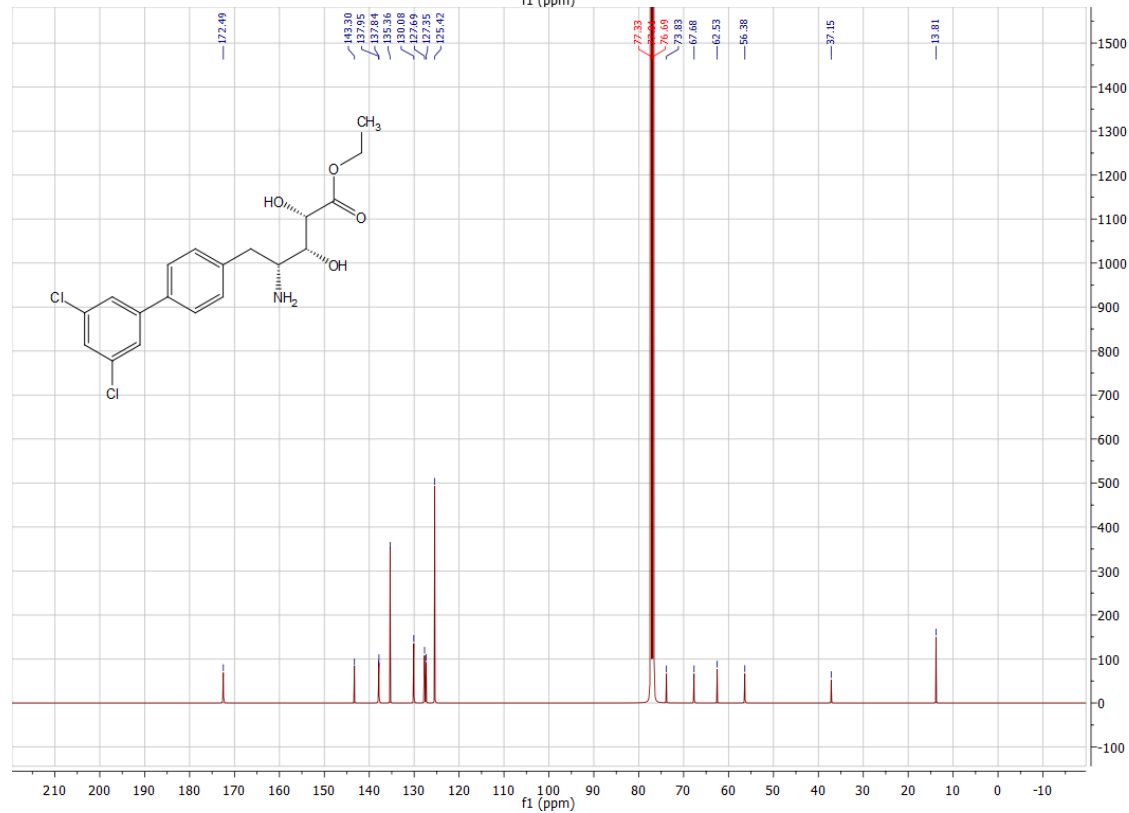

Compound **17** (CW7)

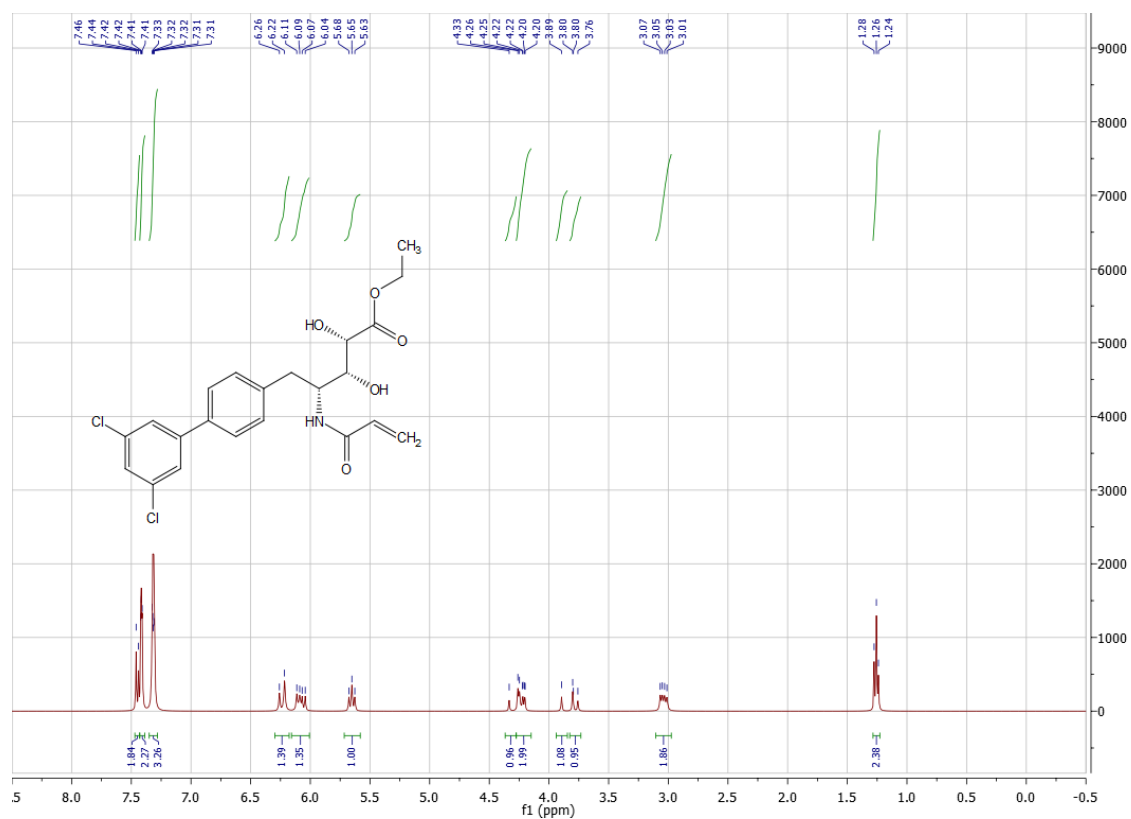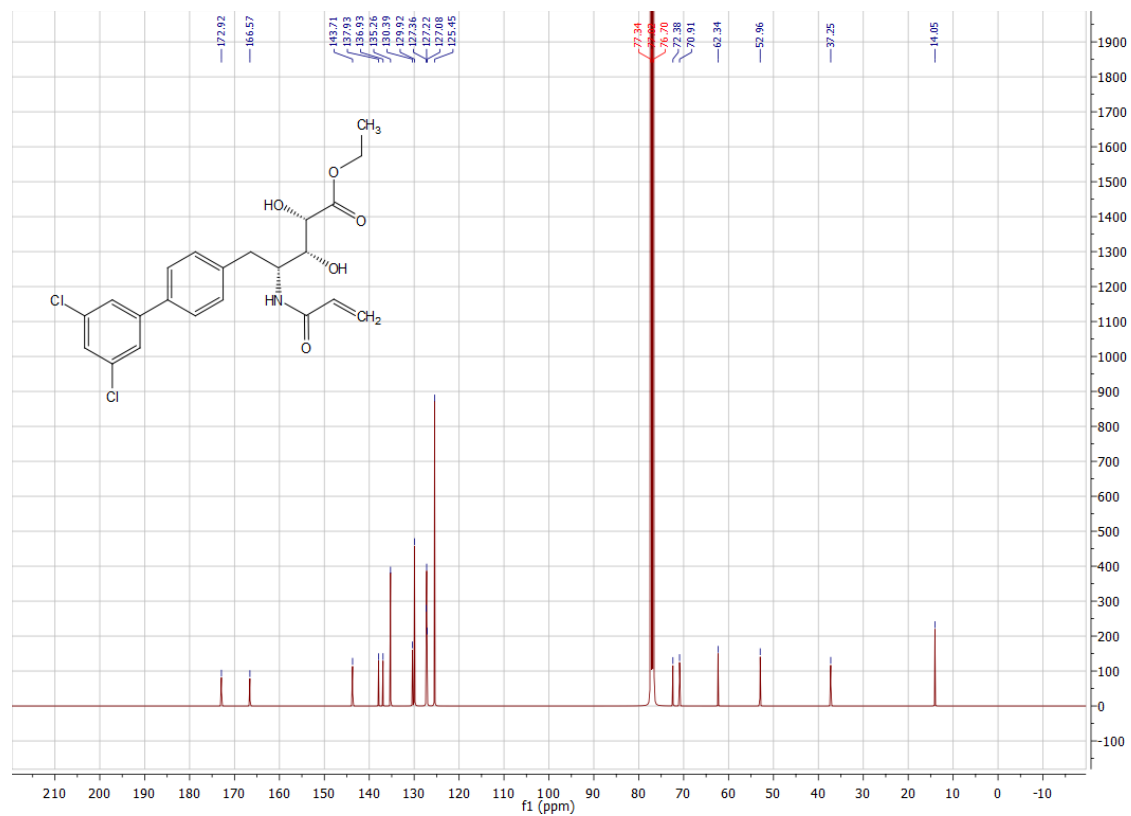



Compound **18** (CW8)

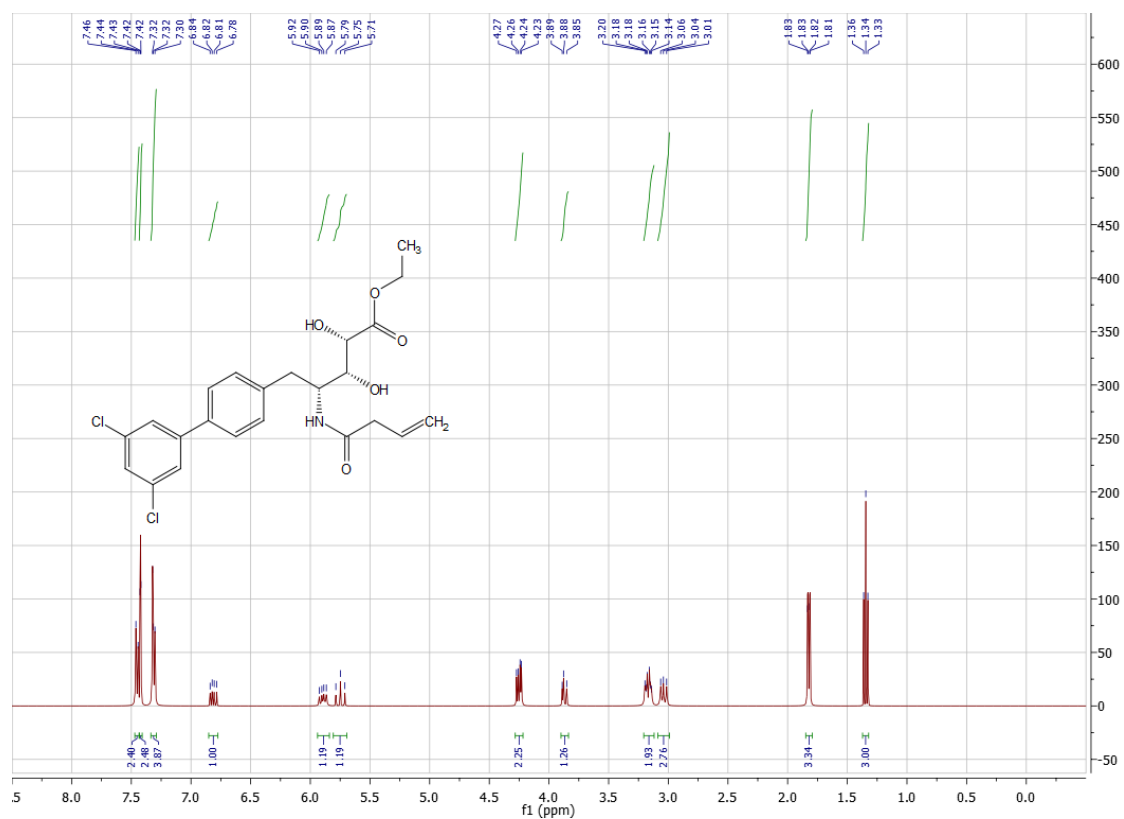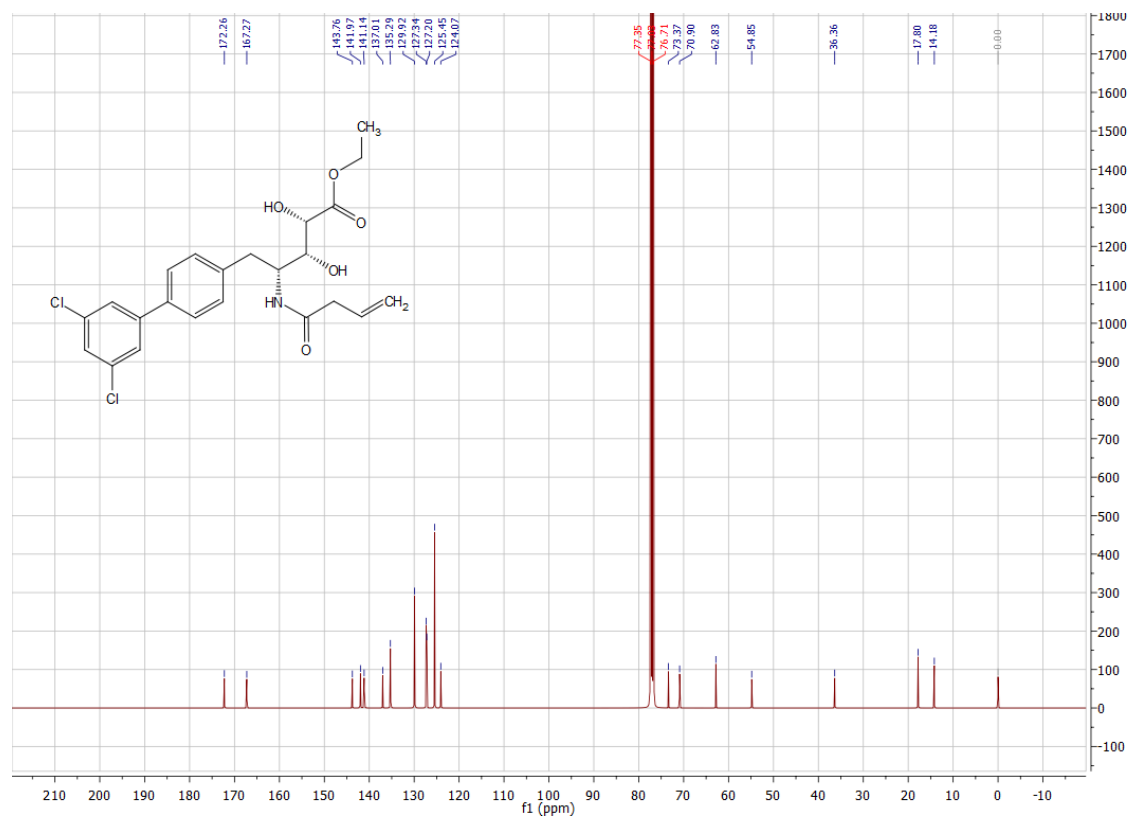

Compound **19** (CW9)

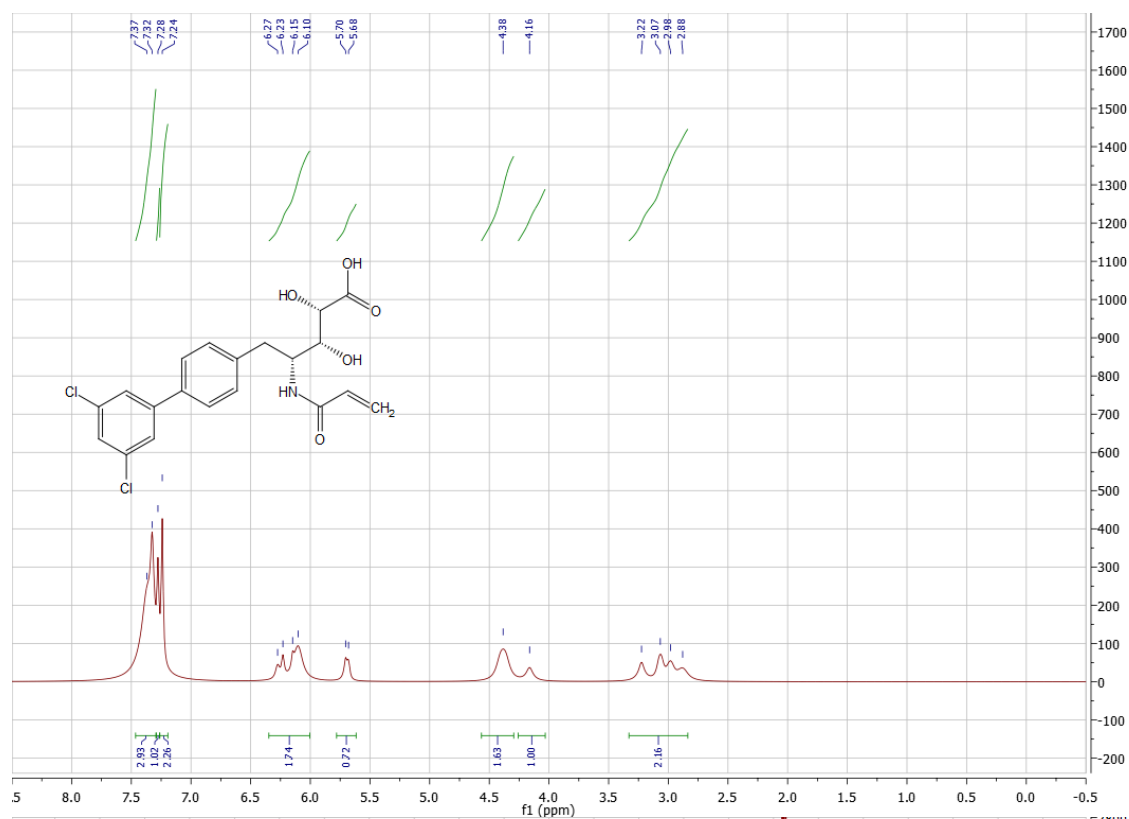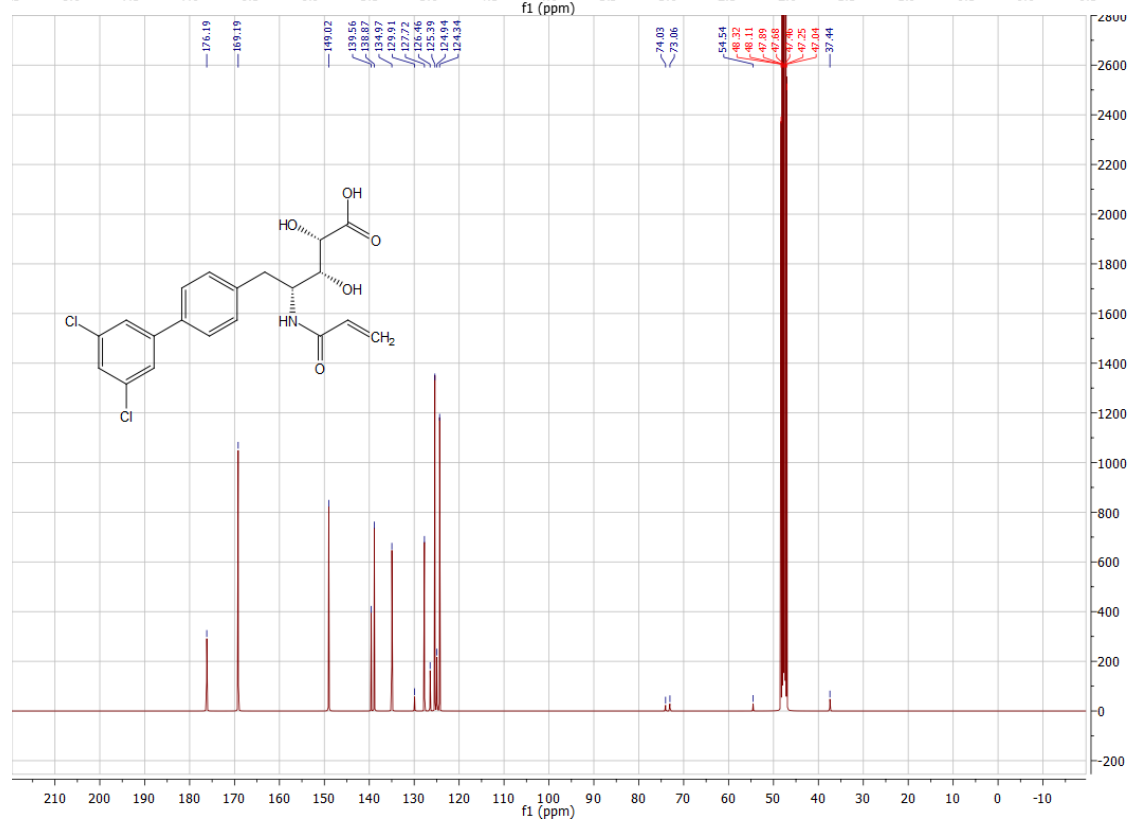

Compound **20** (CW10)

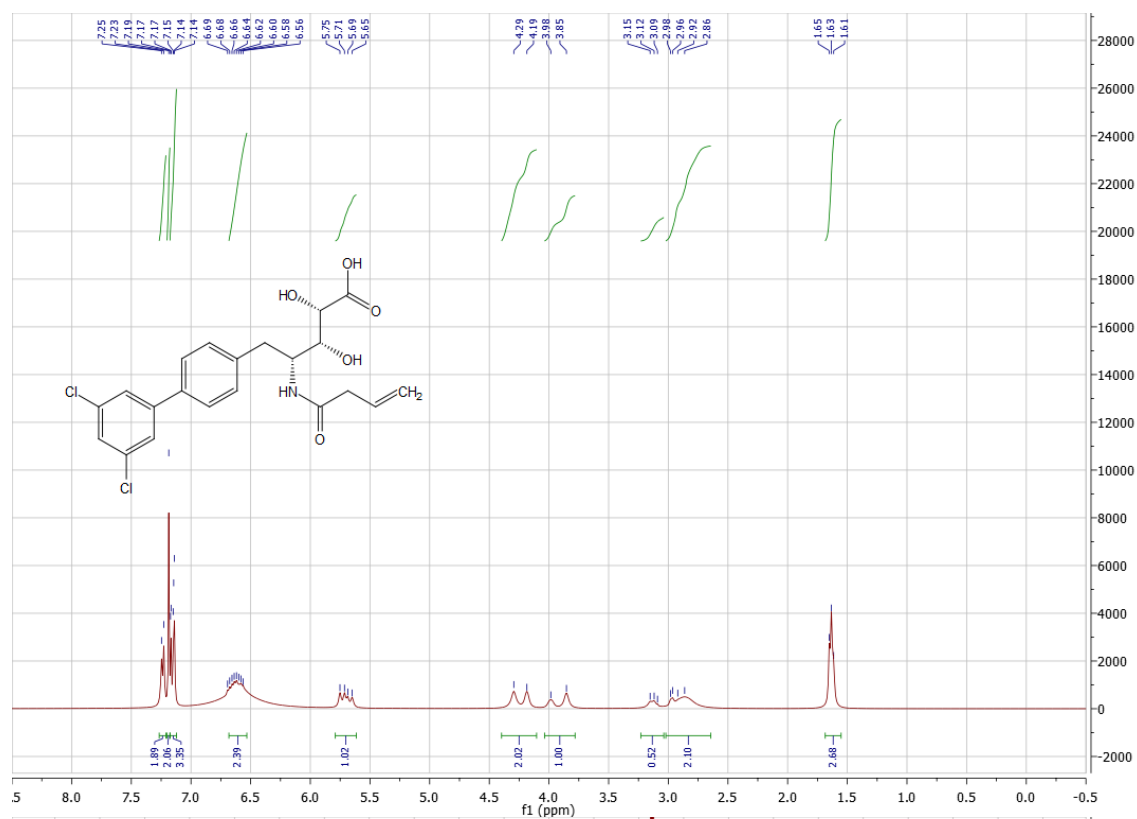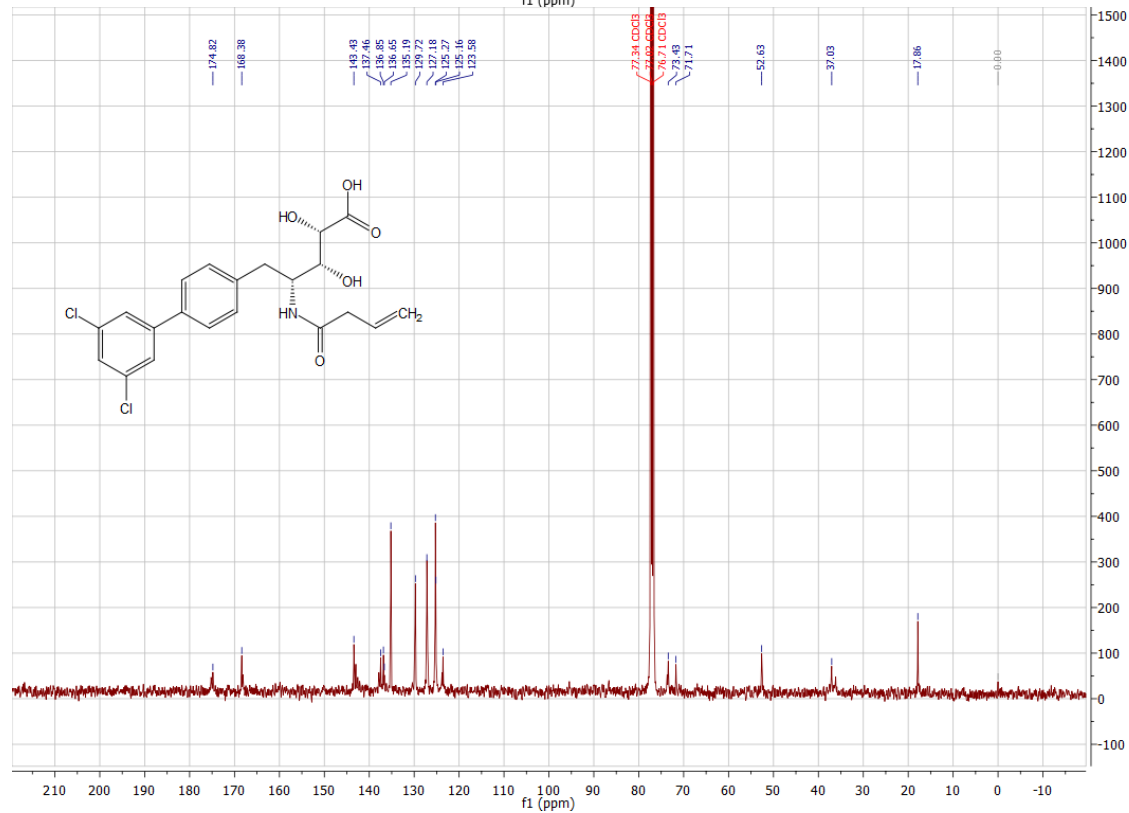

# Compound 22

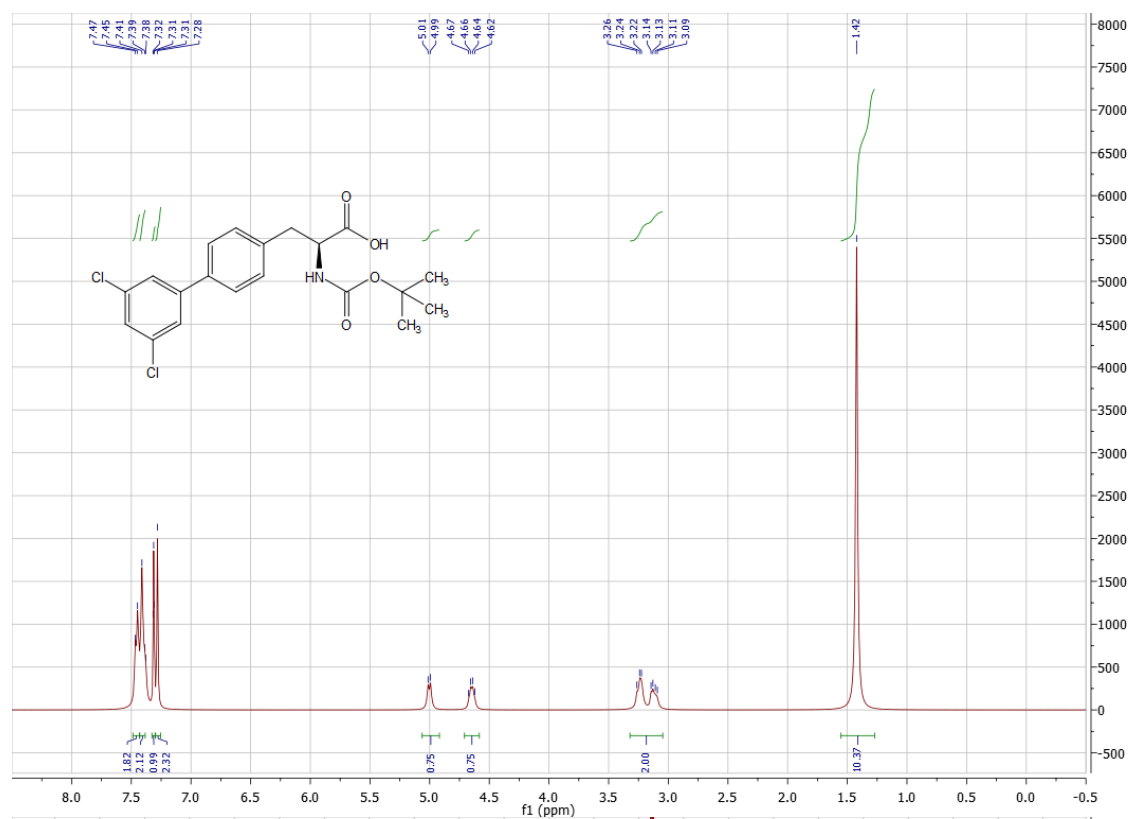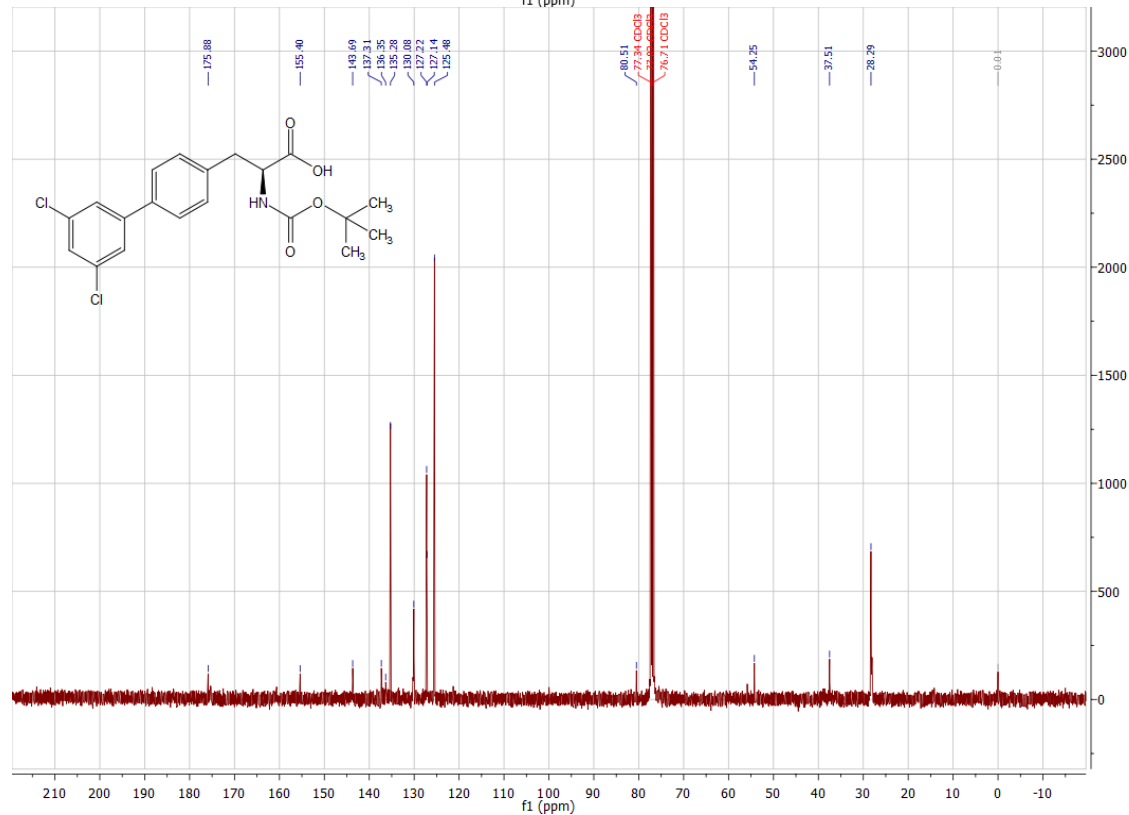

# Compound 23

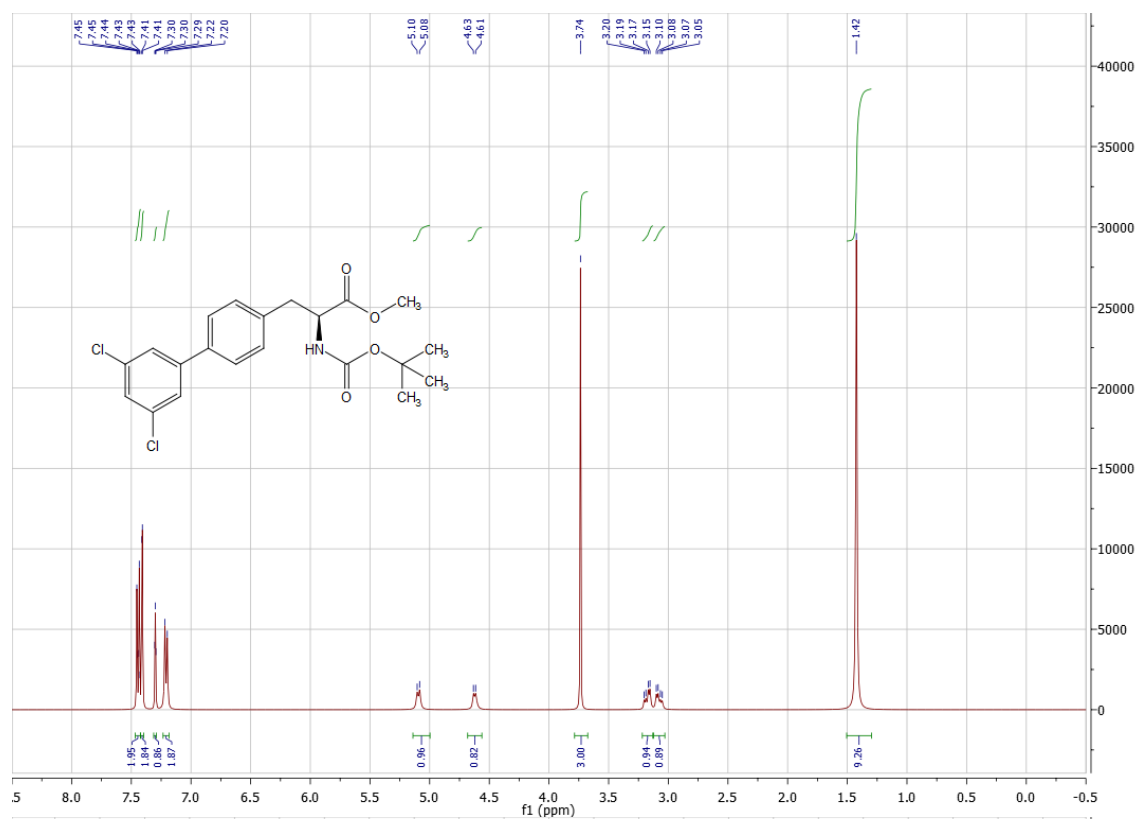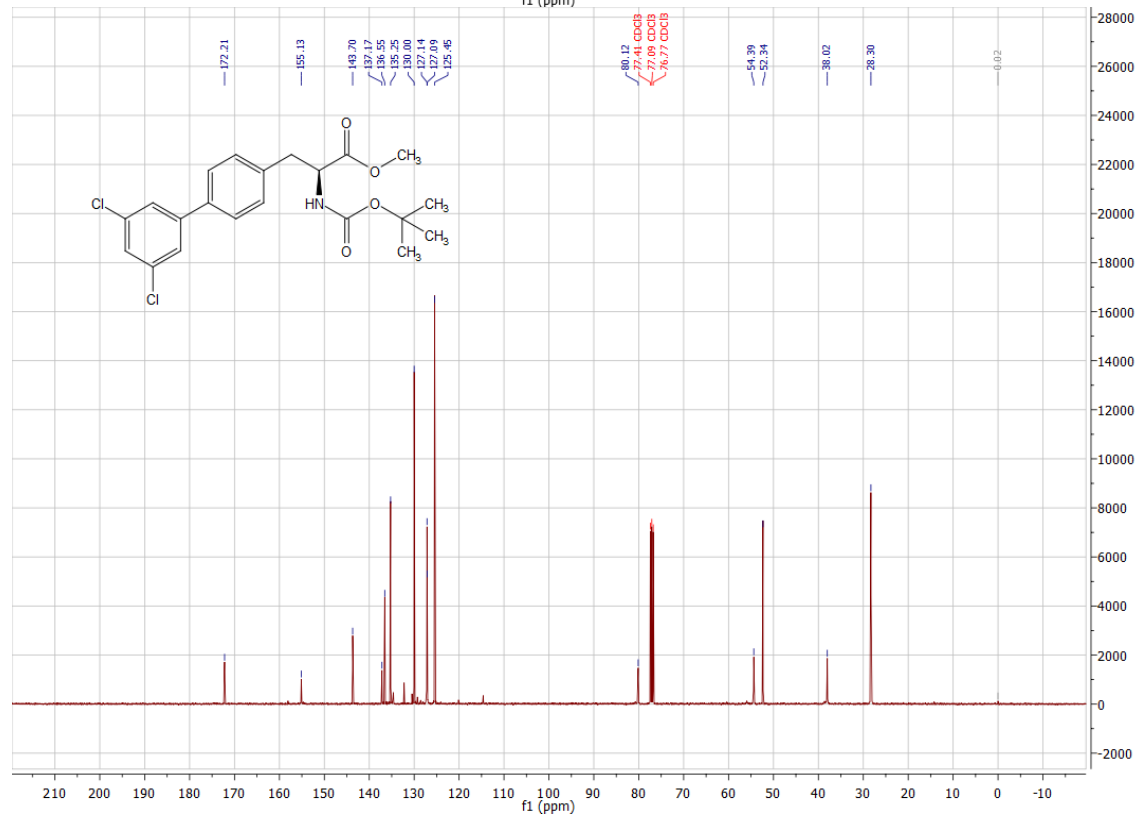

# Compound 24

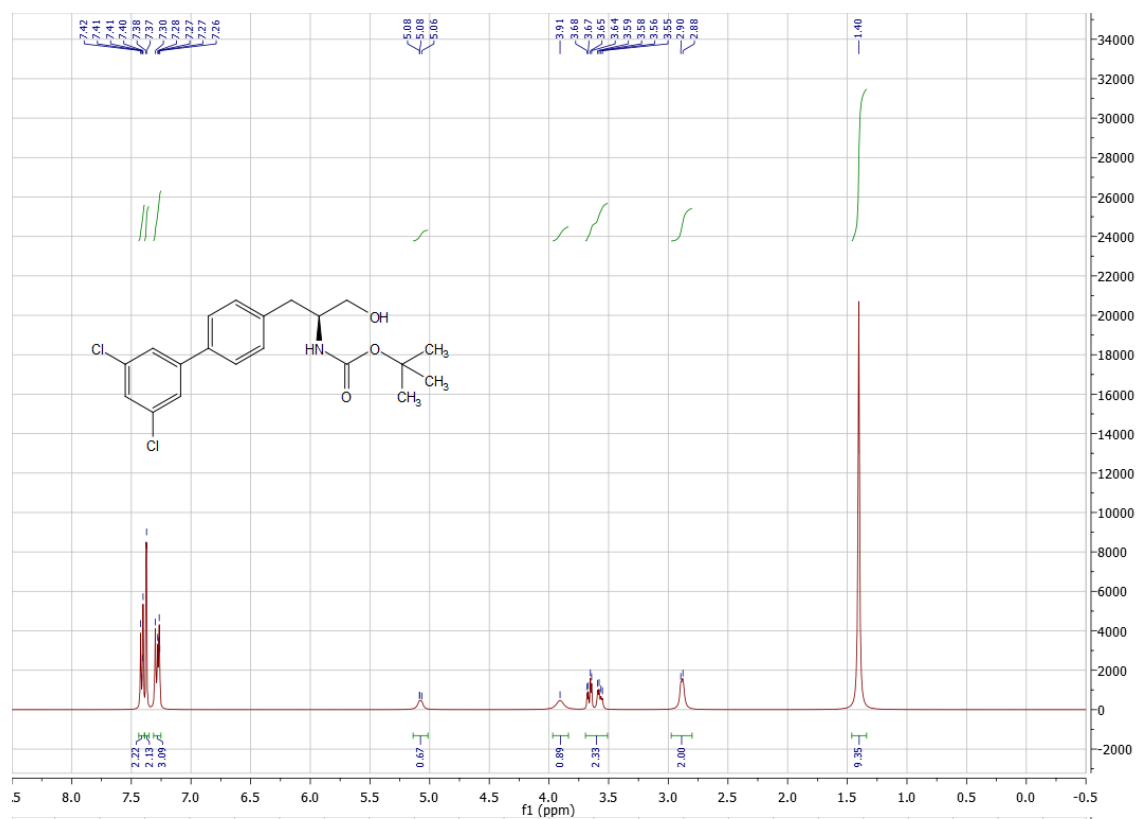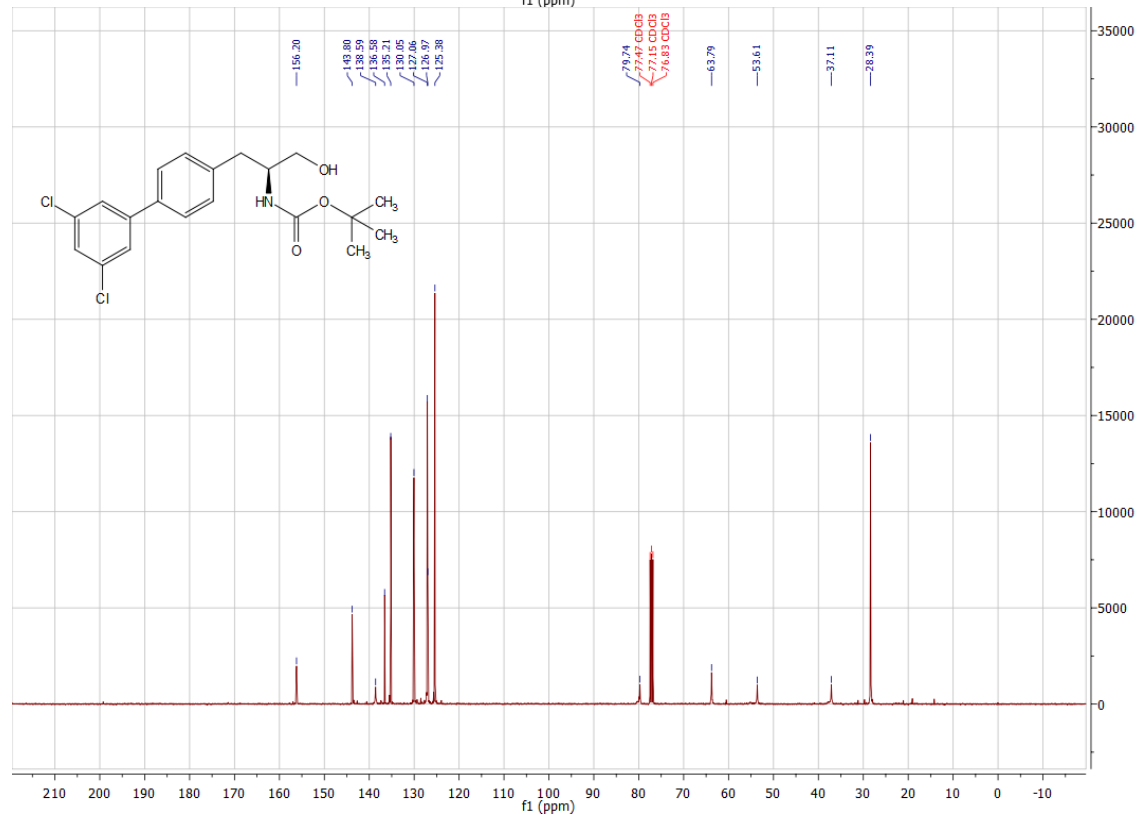

# Compound 25

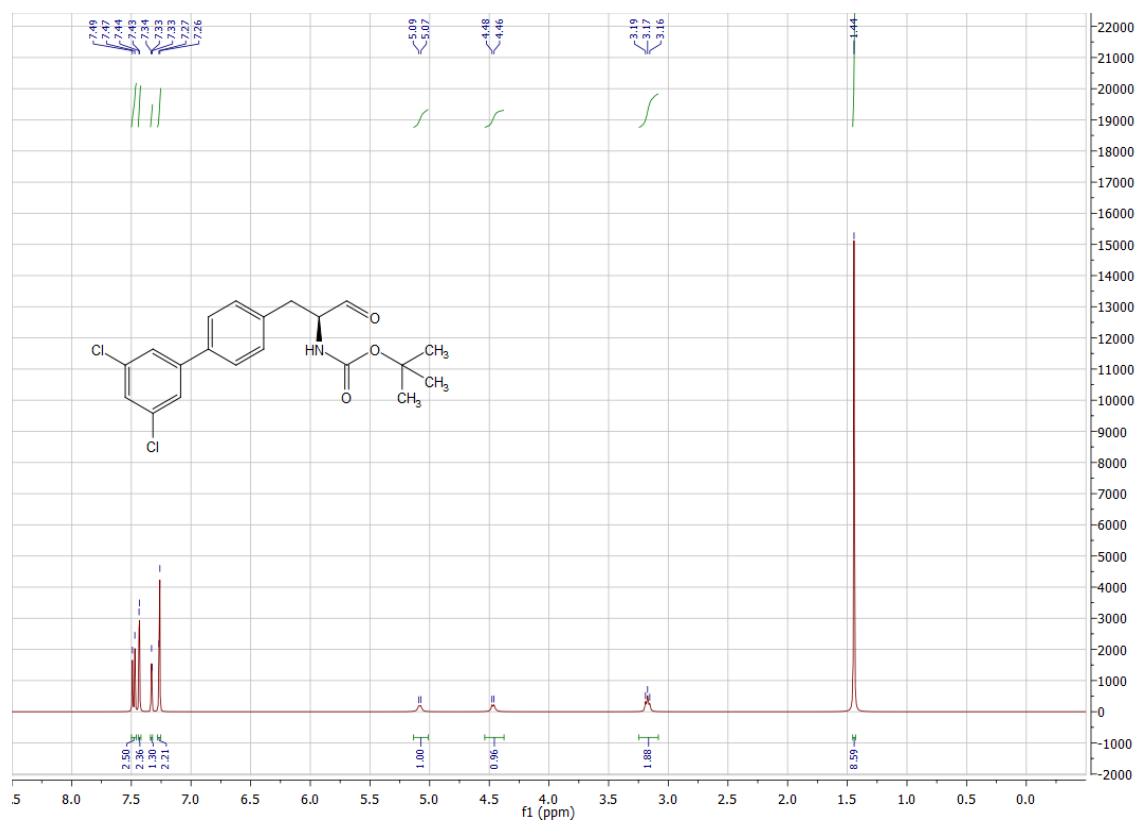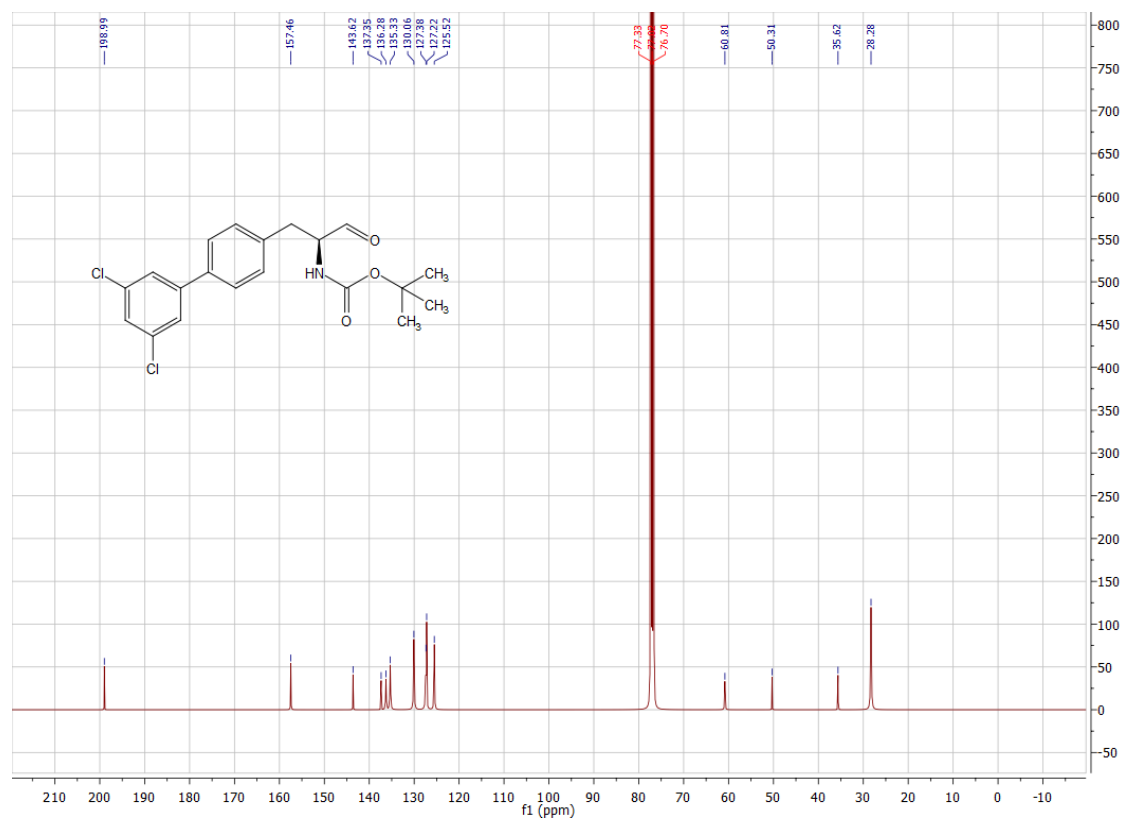

# Compound 26

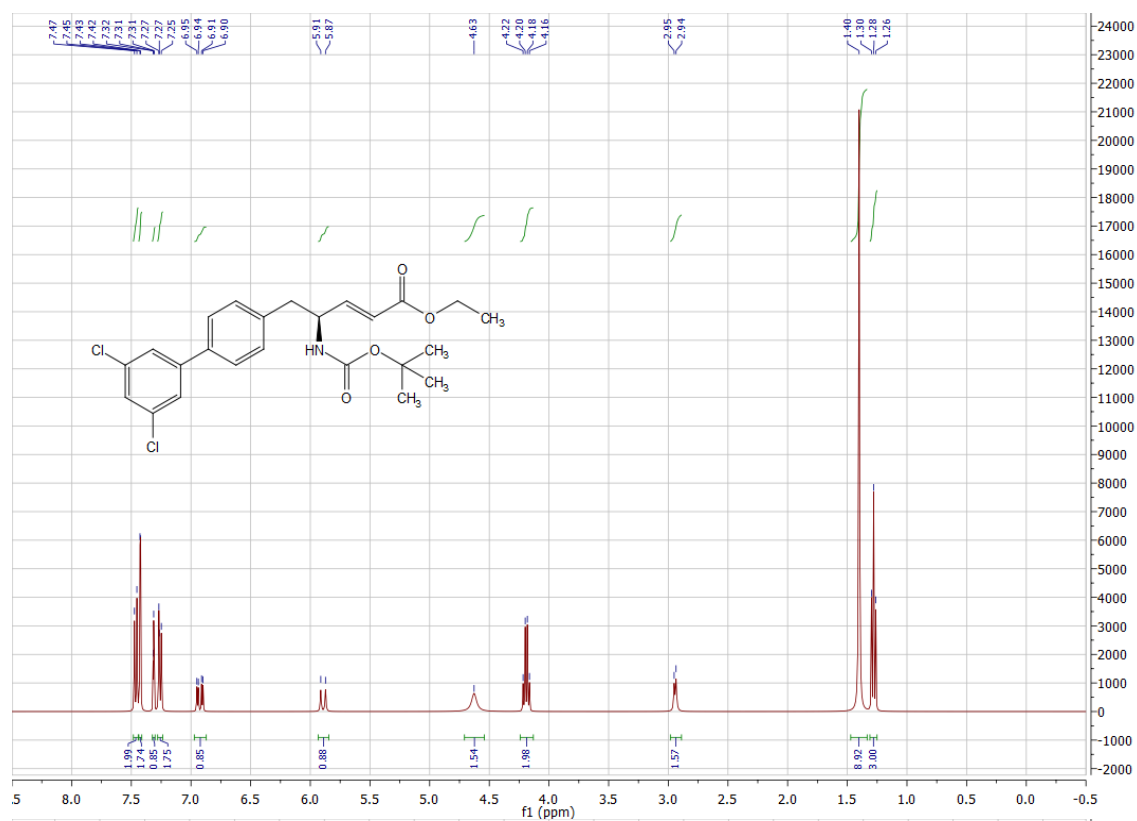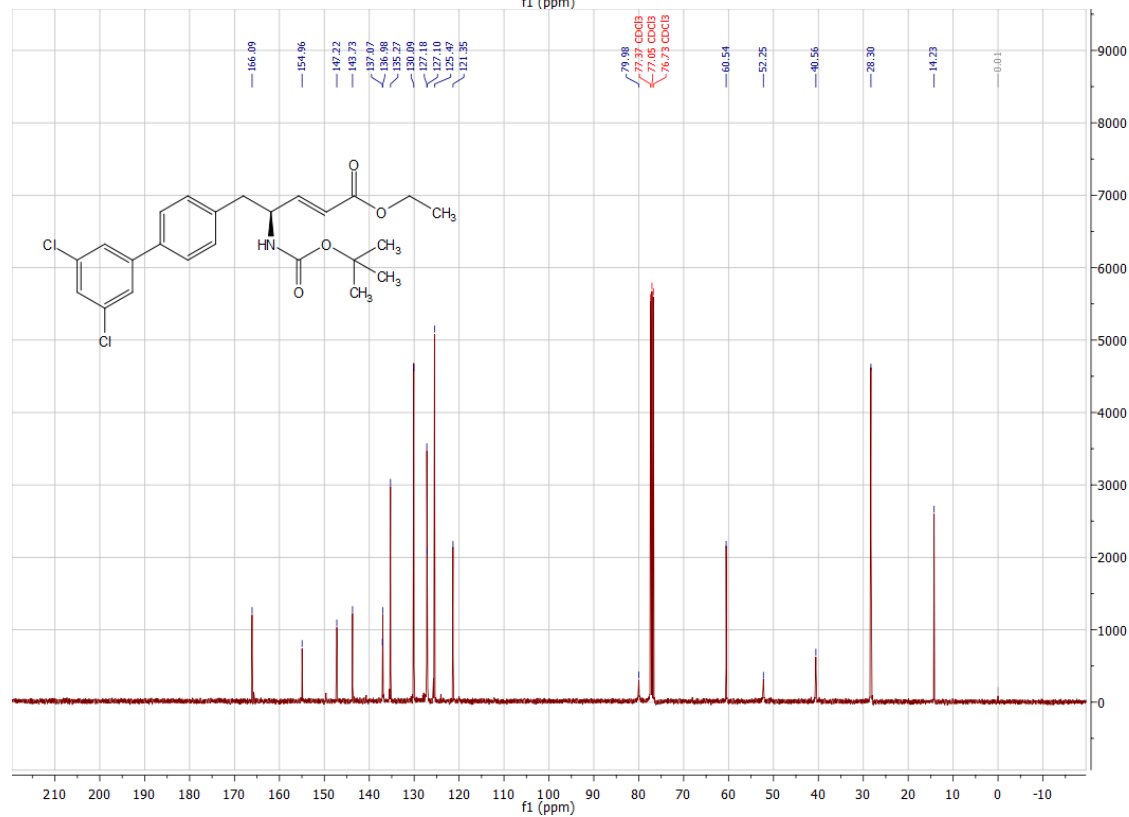



# Compound 27

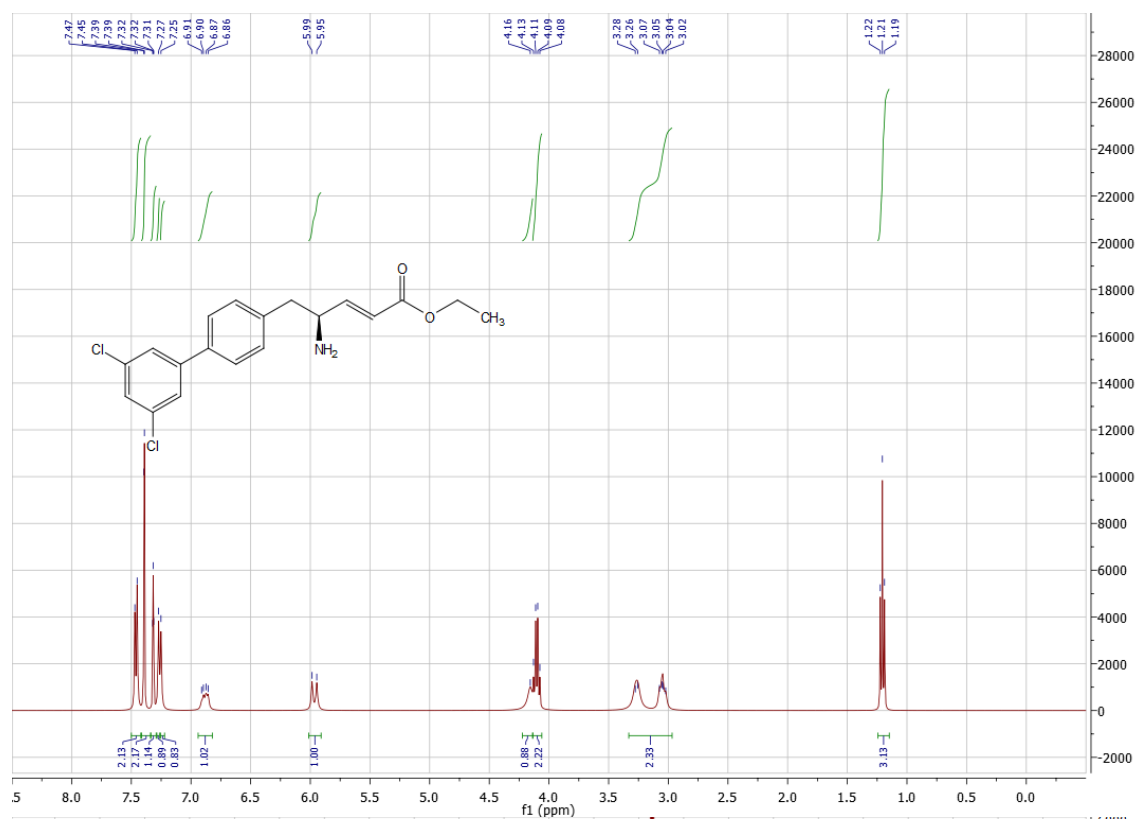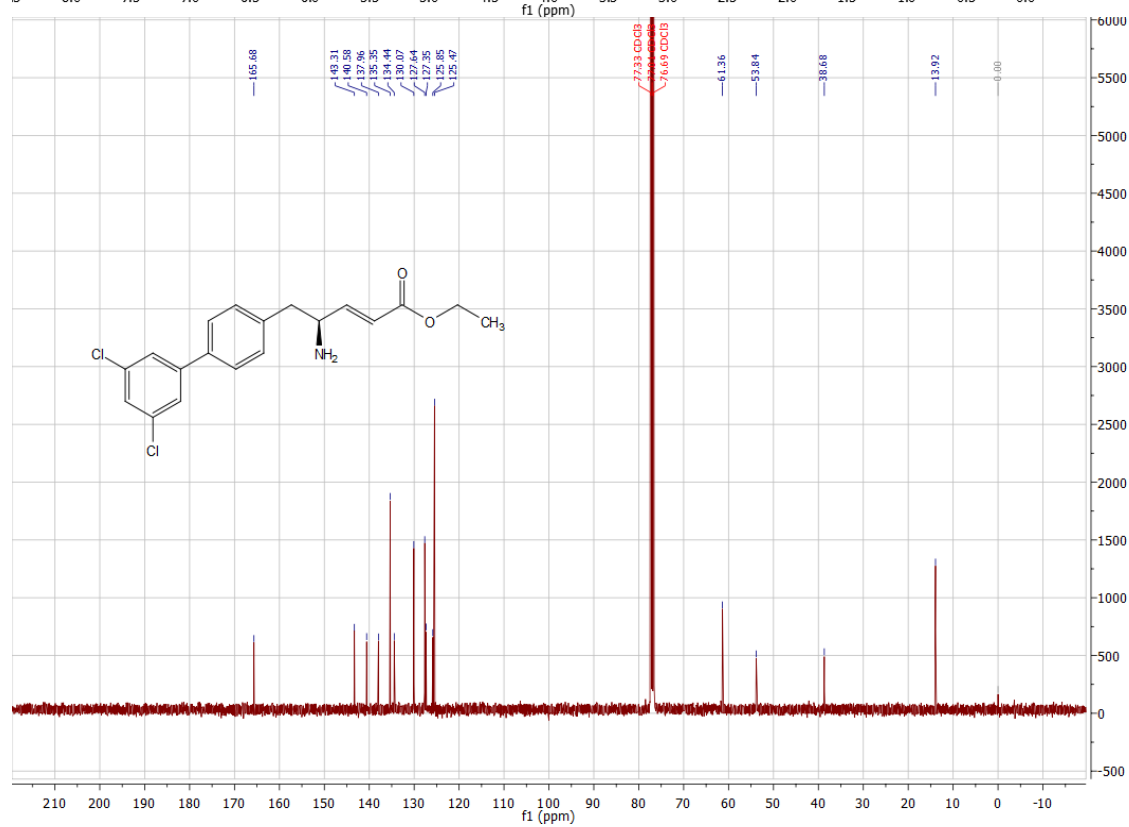

Compound **28** (CW13)

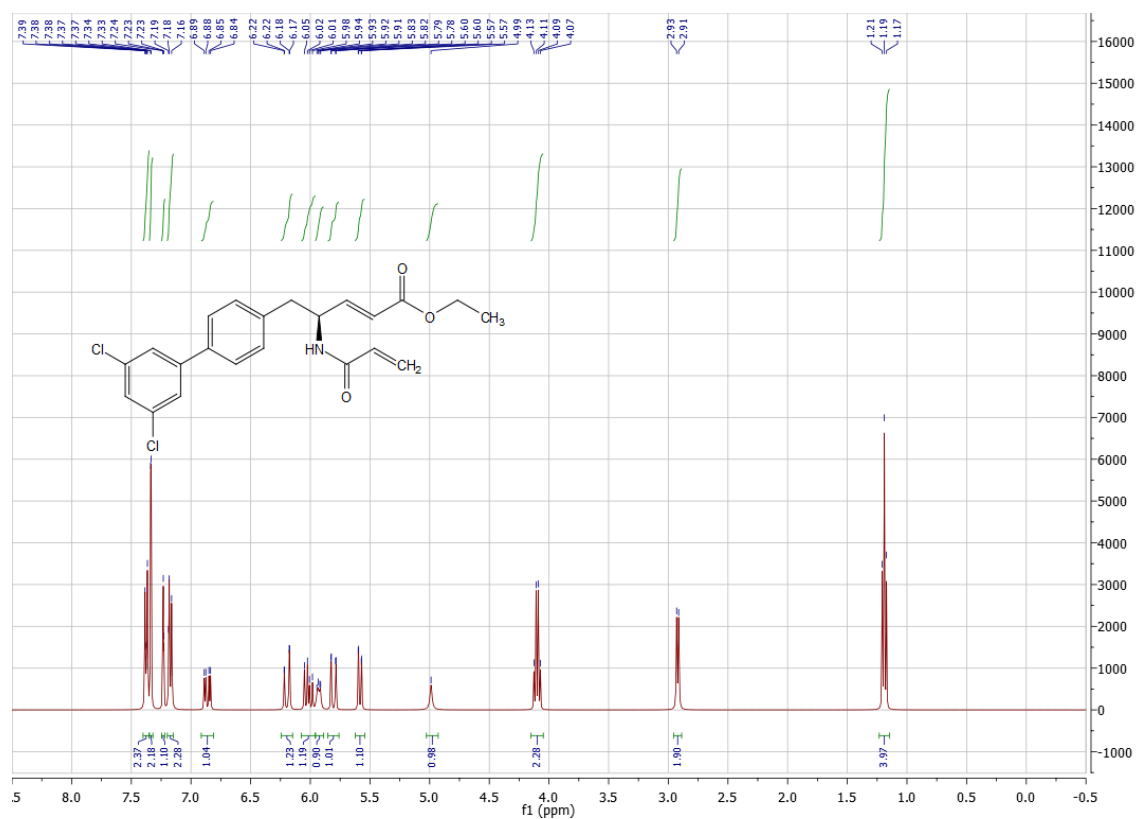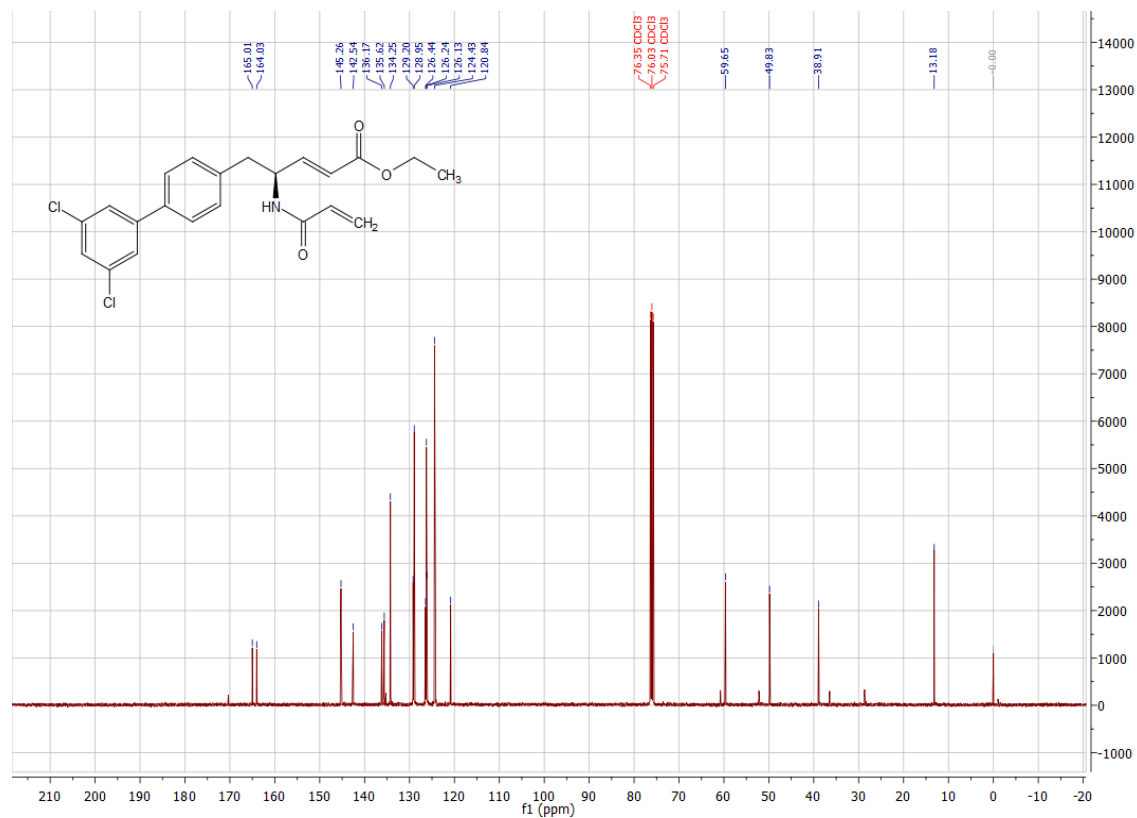

Compound **29** (CW14)

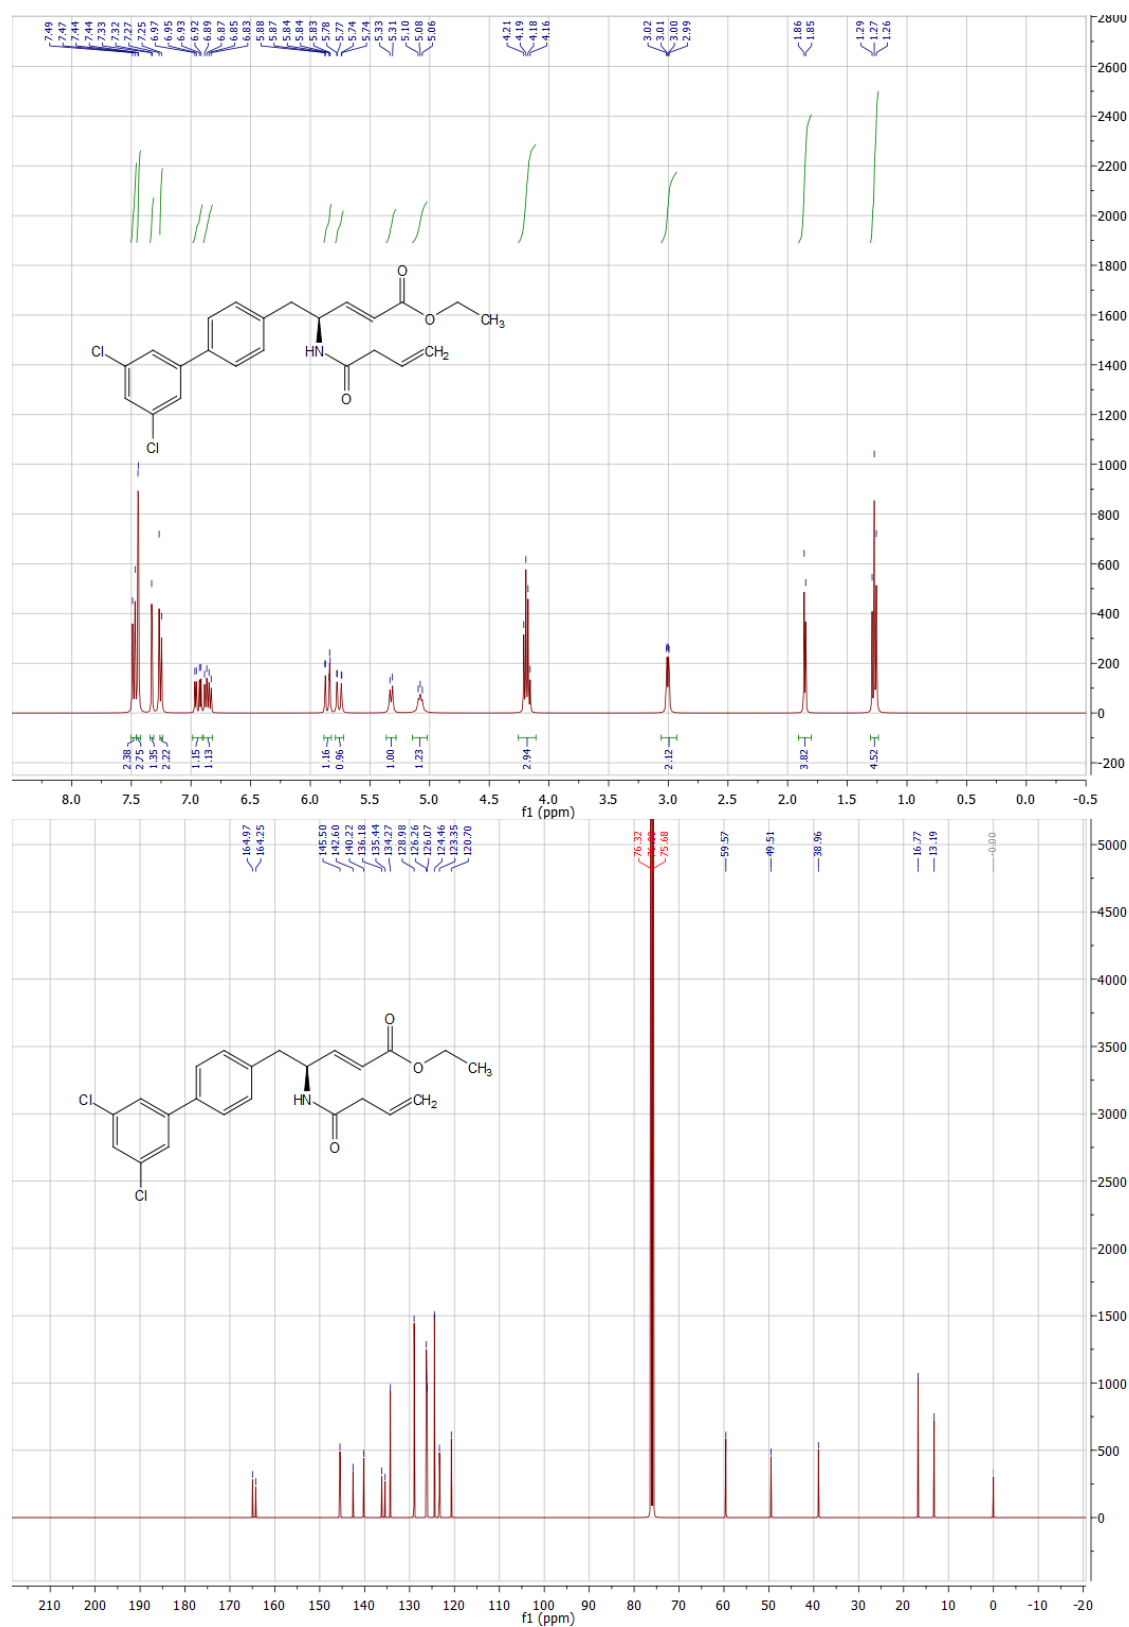

Compound **30** (CW15)

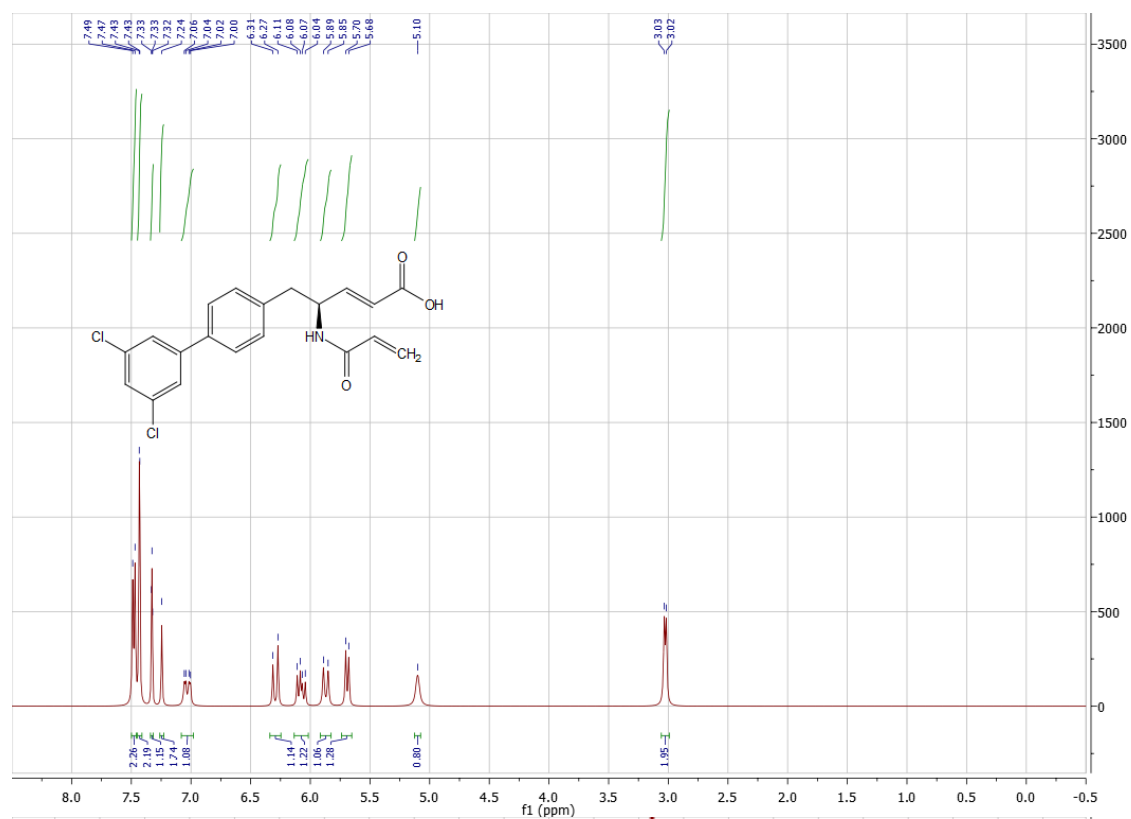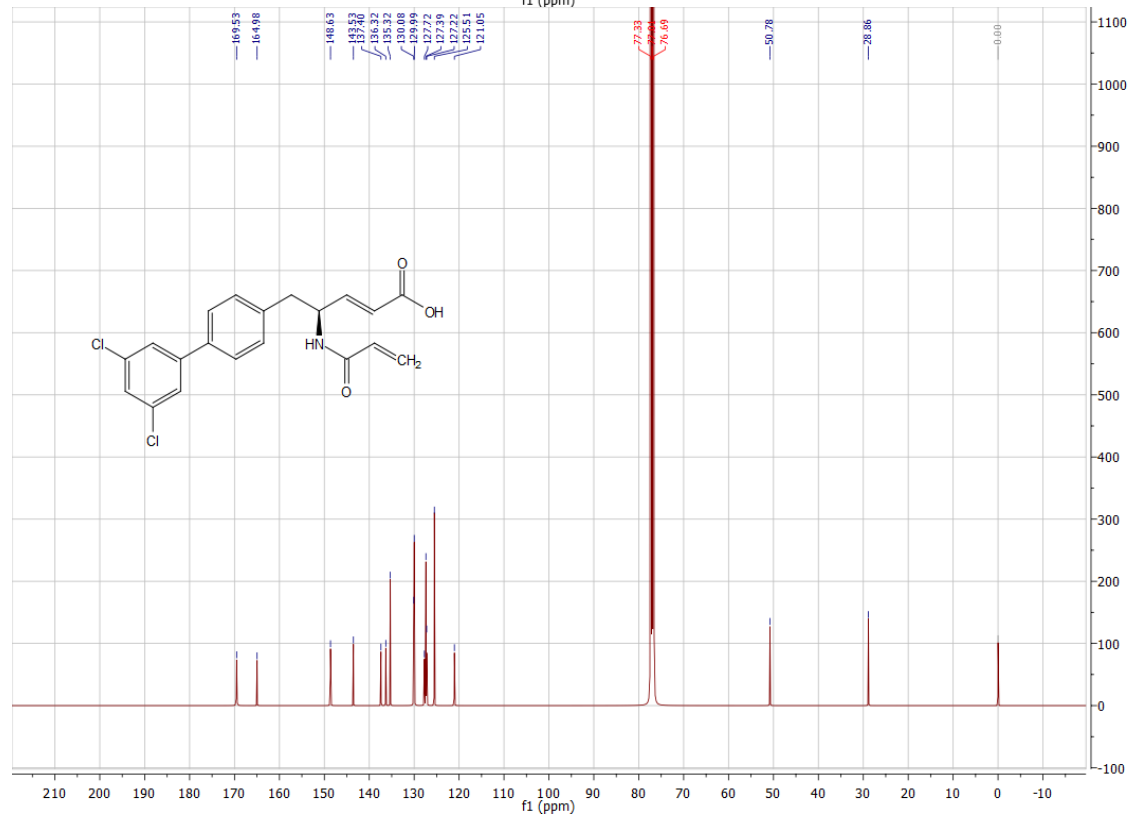

Compound **31** (CW16)

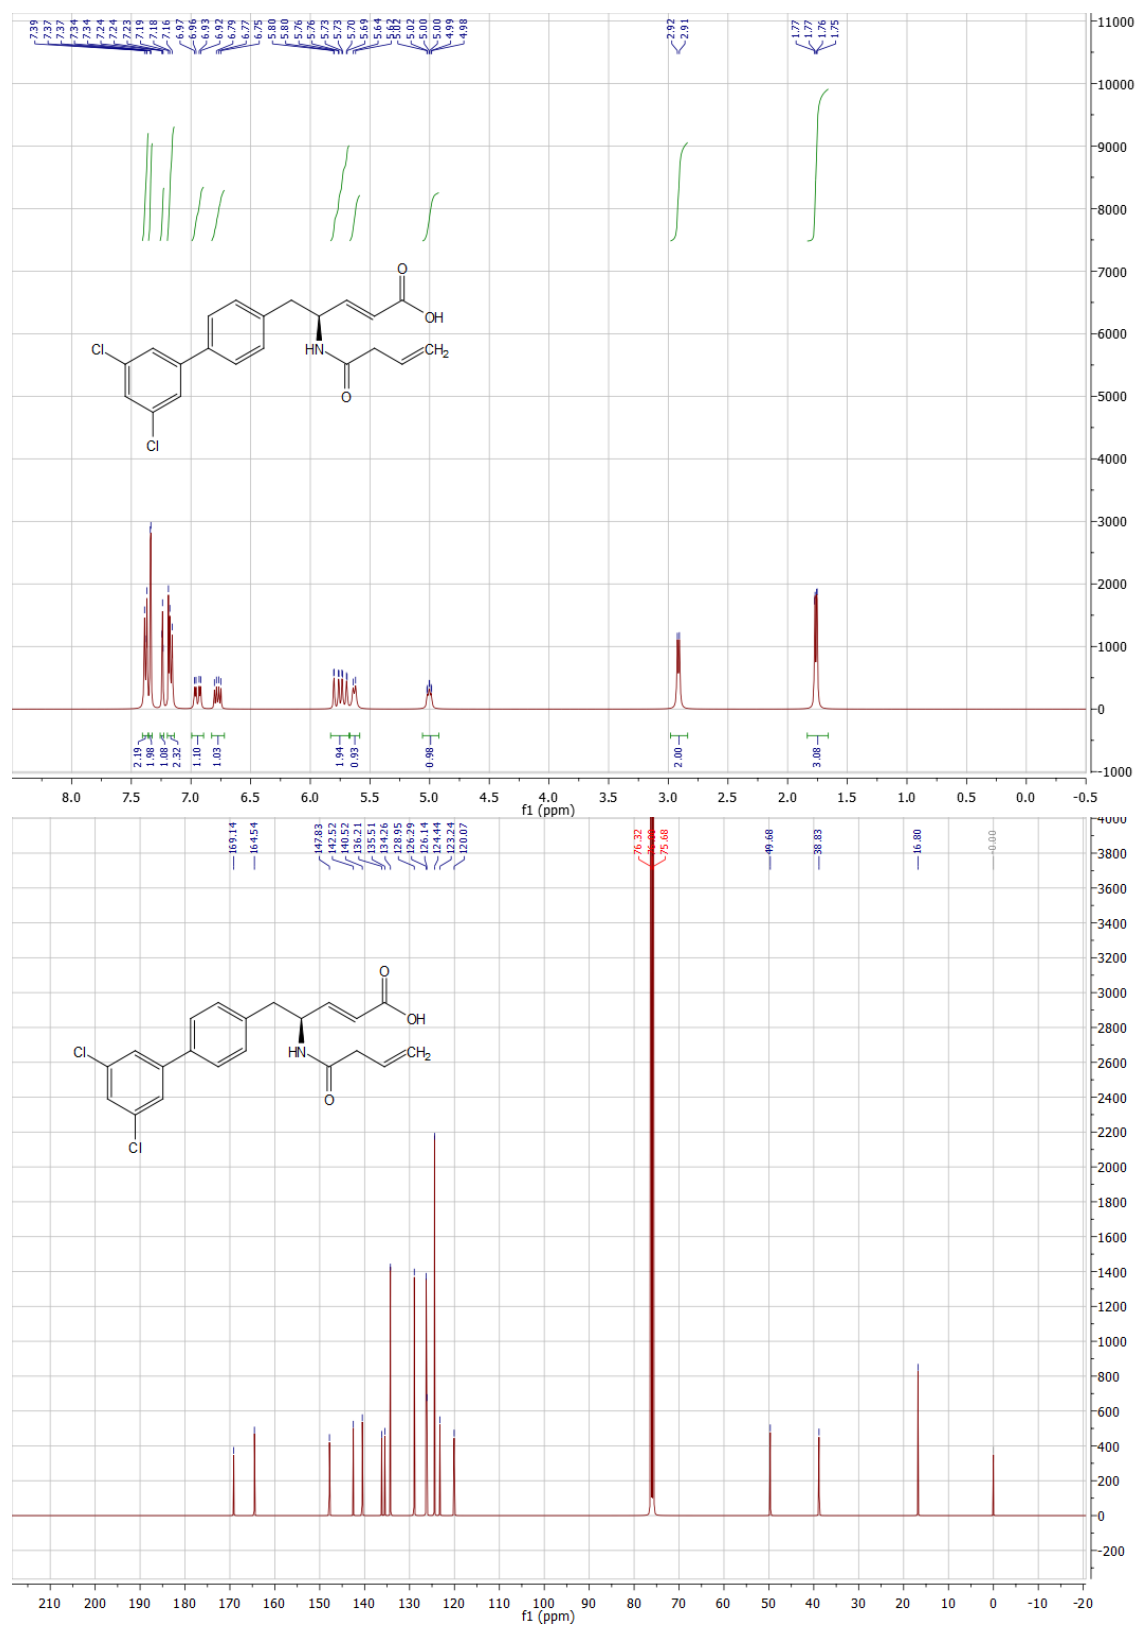

Compound **32**

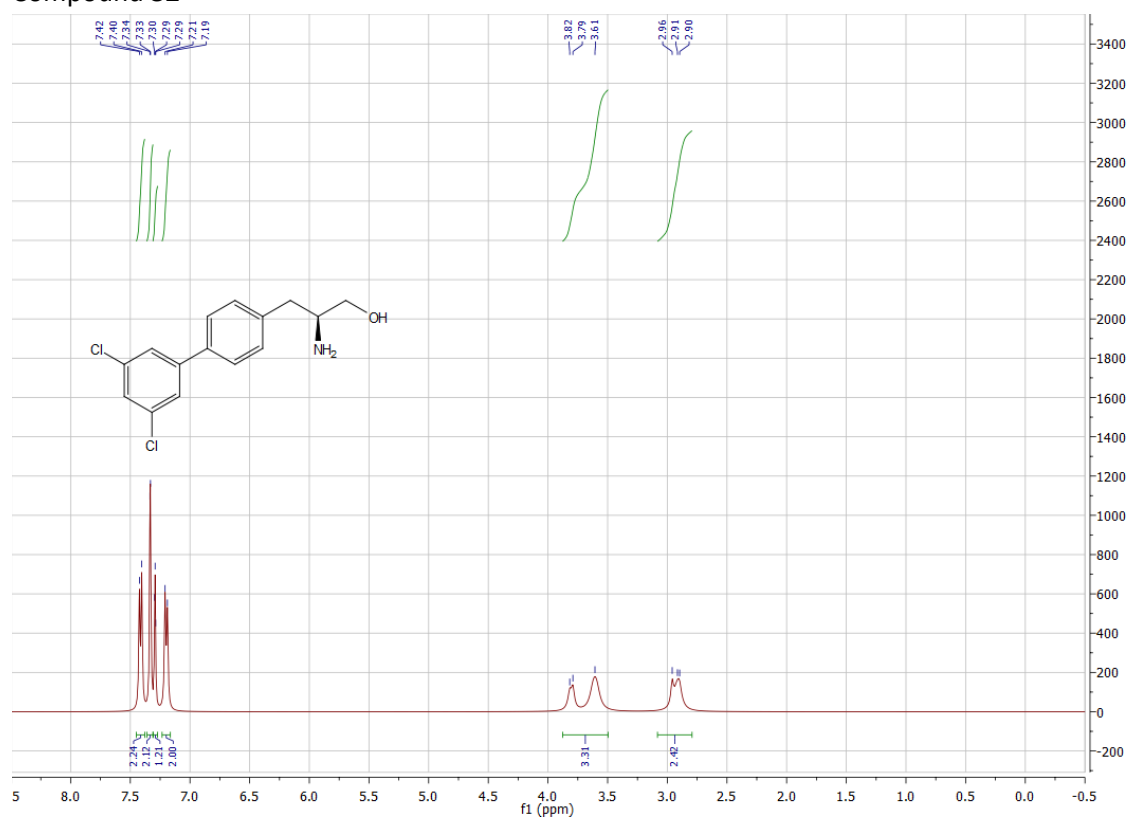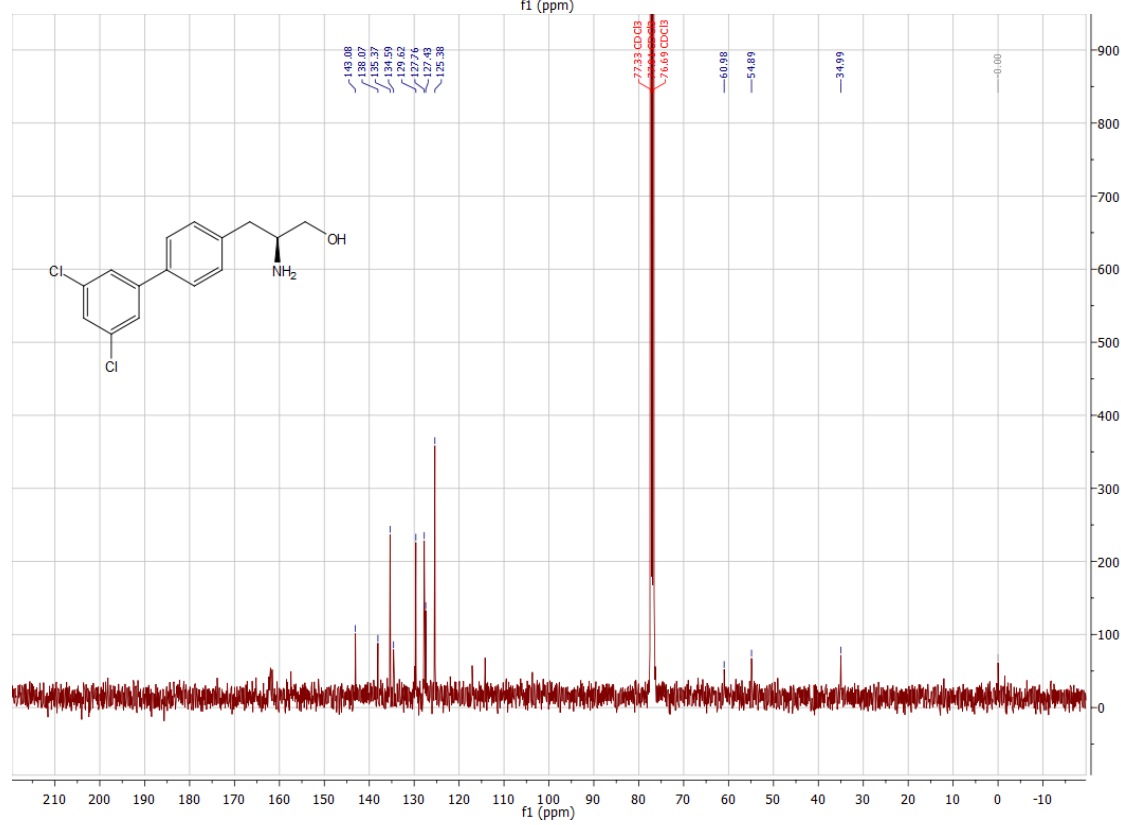

Compound **33**

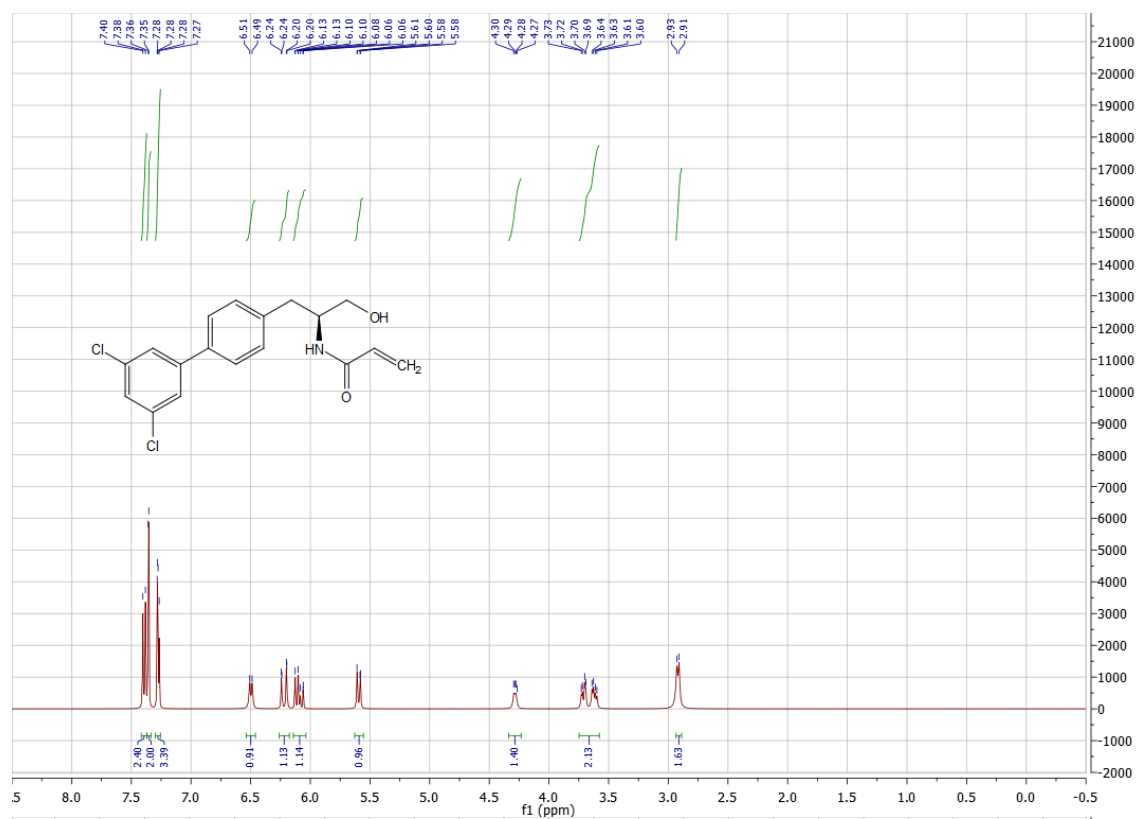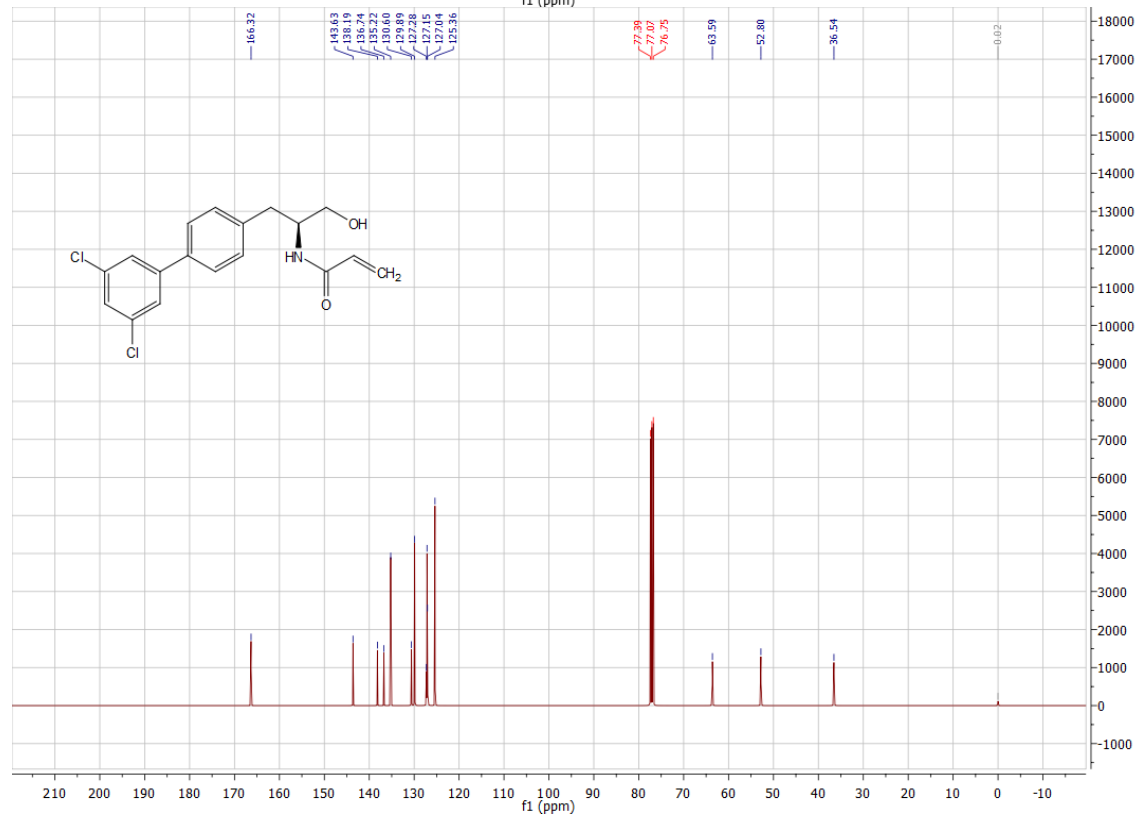

Compound **34**

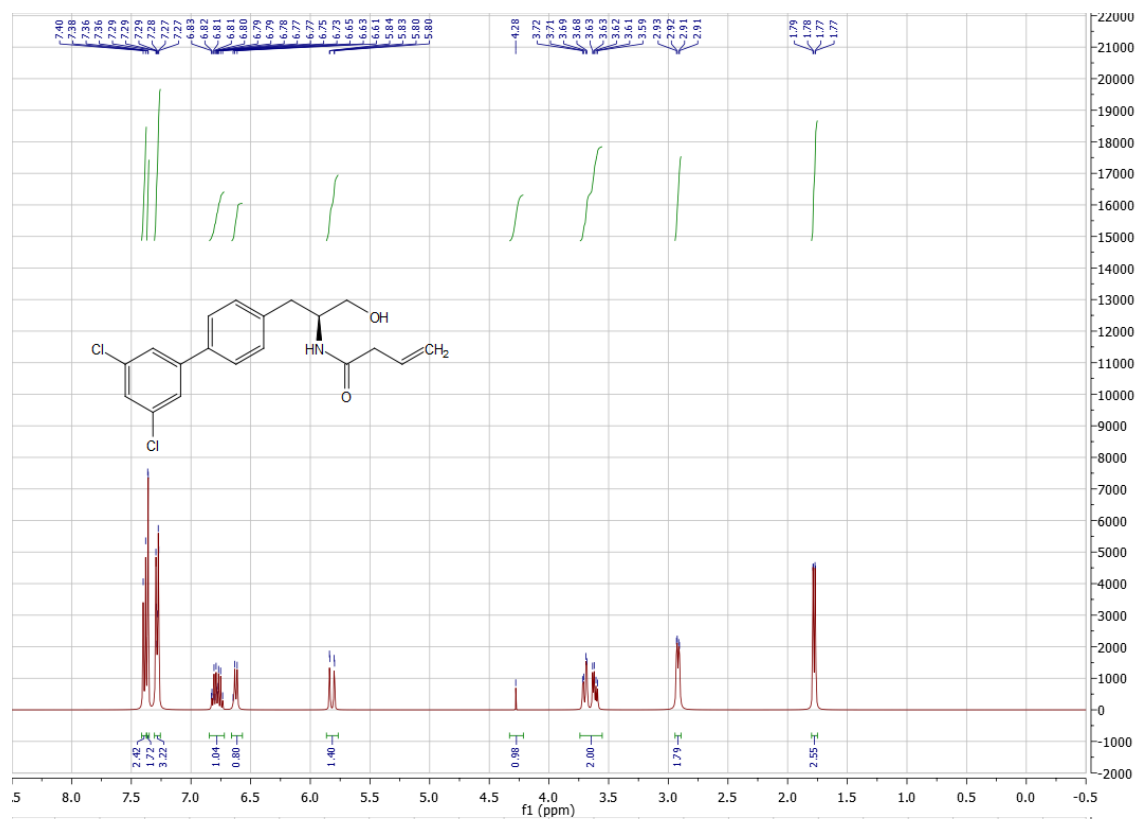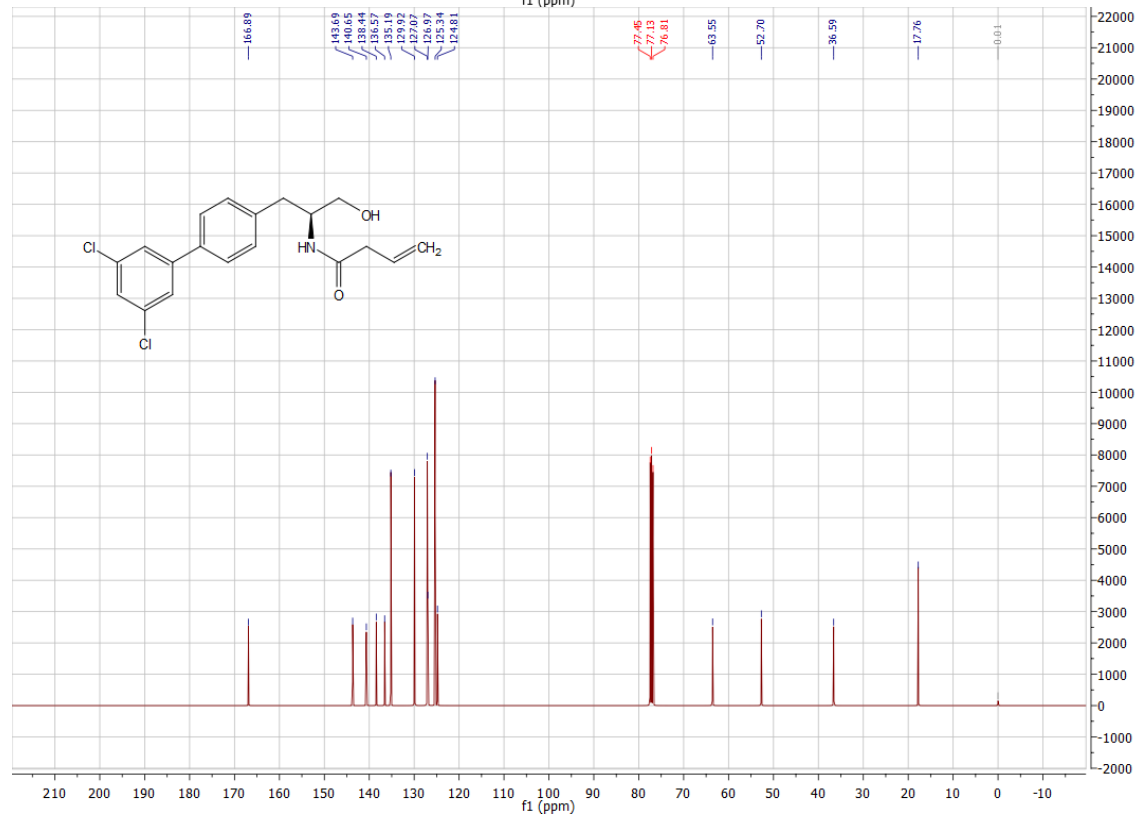



Compound **35**

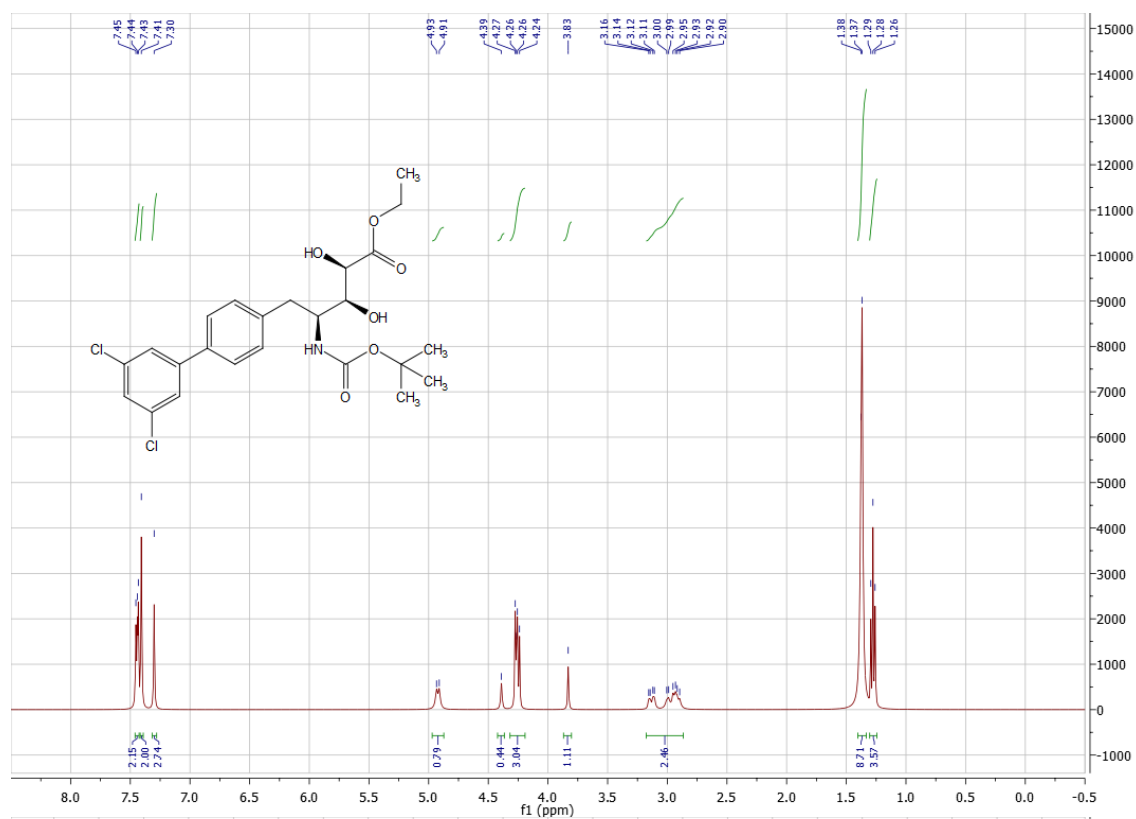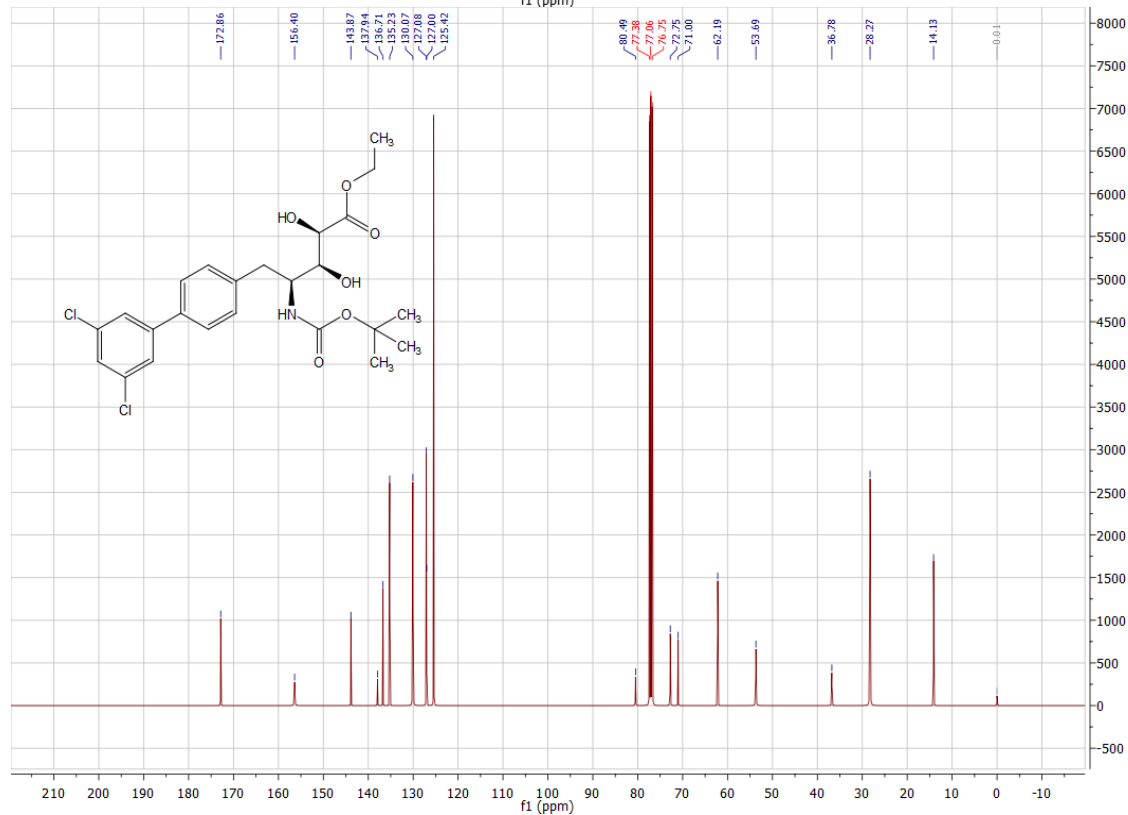

# Compound 36

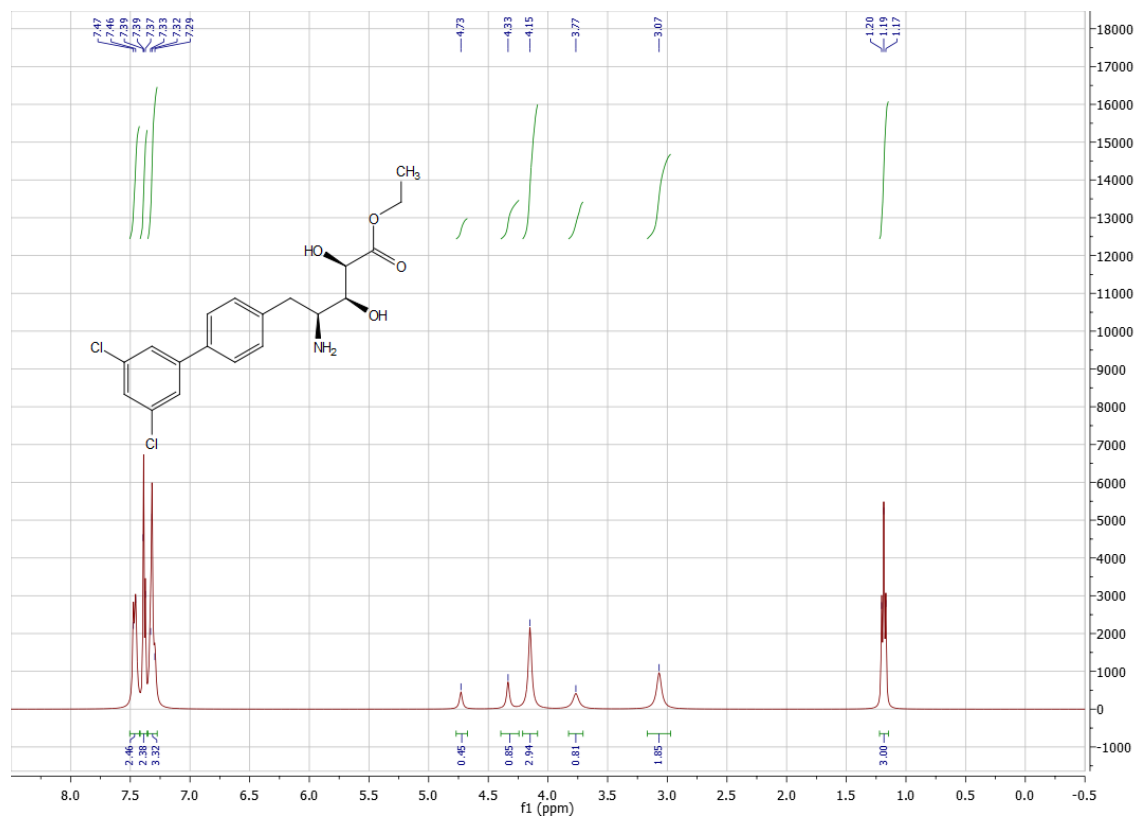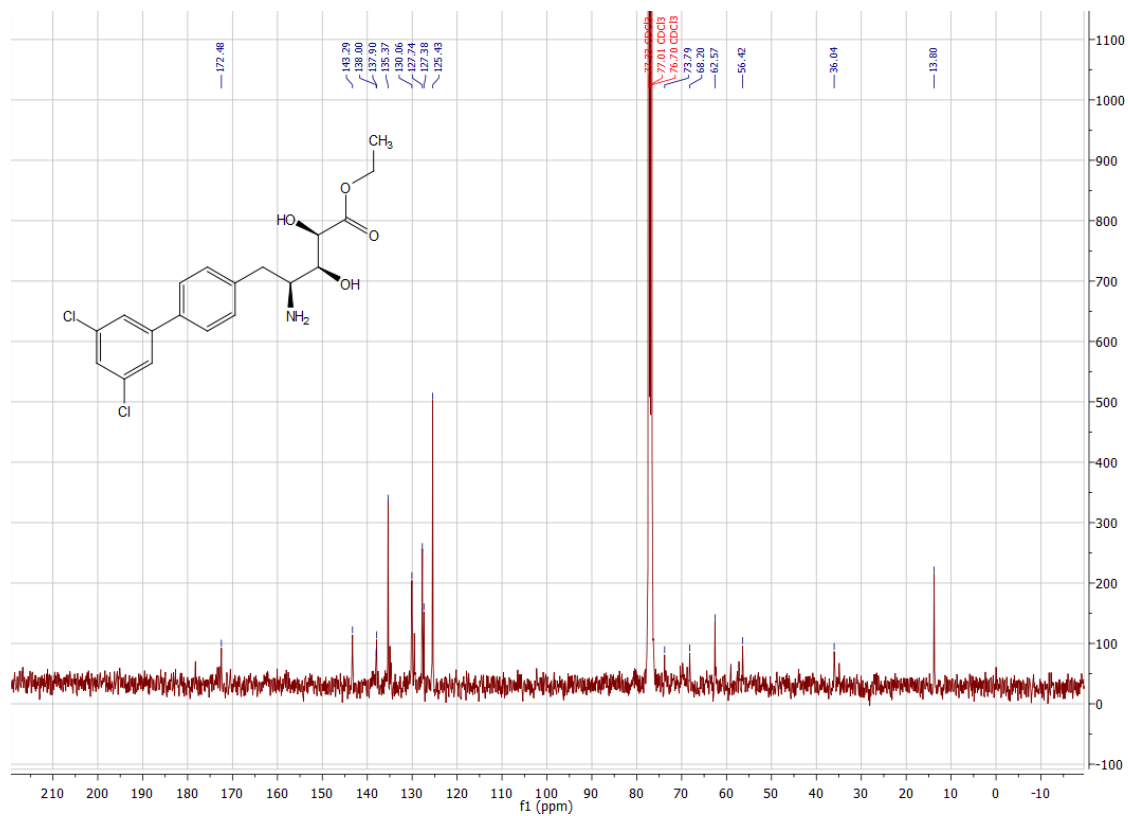

**<sup>1</sup>H NMR (400 MHz, CDCl<sub>3</sub>)**

Chemical structure of compound 10: CCOC(=O)[C@H](O)[C@@H](O)NC(=O)/C=C/c1ccc(cc1)-c2ccc(Cl)cc2

Peak list (ppm): 7.45, 7.43, 7.41, 7.39, 7.38, 7.33, 7.31, 7.30, 7.29, 7.28, 7.27, 7.26, 7.25, 7.24, 7.23, 7.22, 7.21, 7.20, 7.19, 7.18, 7.17, 7.16, 7.15, 7.14, 7.13, 7.12, 7.11, 7.10, 7.09, 7.08, 7.07, 7.06, 7.05, 7.04, 7.03, 7.02, 7.01, 7.00, 6.99, 6.98, 6.97, 6.96, 6.95, 6.94, 6.93, 6.92, 6.91, 6.90, 6.89, 6.88, 6.87, 6.86, 6.85, 6.84, 6.83, 6.82, 6.81, 6.80, 6.79, 6.78, 6.77, 6.76, 6.75, 6.74, 6.73, 6.72, 6.71, 6.70, 6.69, 6.68, 6.67, 6.66, 6.65, 6.64, 6.63, 6.62, 6.61, 6.60, 6.59, 6.58, 6.57, 6.56, 6.55, 6.54, 6.53, 6.52, 6.51, 6.50, 6.49, 6.48, 6.47, 6.46, 6.45, 6.44, 6.43, 6.42, 6.41, 6.40, 6.39, 6.38, 6.37, 6.36, 6.35, 6.34, 6.33, 6.32, 6.31, 6.30, 6.29, 6.28, 6.27, 6.26, 6.25, 6.24, 6.23, 6.22, 6.21, 6.20, 6.19, 6.18, 6.17, 6.16, 6.15, 6.14, 6.13, 6.12, 6.11, 6.10, 6.09, 6.08, 6.07, 6.06, 6.05, 6.04, 6.03, 6.02, 6.01, 6.00, 5.99, 5.98, 5.97, 5.96, 5.95, 5.94, 5.93, 5.92, 5.91, 5.90, 5.89, 5.88, 5.87, 5.86, 5.85, 5.84, 5.83, 5.82, 5.81, 5.80, 5.79, 5.78, 5.77, 5.76, 5.75, 5.74, 5.73, 5.72, 5.71, 5.70, 5.69, 5.68, 5.67, 5.66, 5.65, 5.64, 5.63, 5.62, 5.61, 5.60, 5.59, 5.58, 5.57, 5.56, 5.55, 5.54, 5.53, 5.52, 5.51, 5.50, 5.49, 5.48, 5.47, 5.46, 5.45, 5.44, 5.43, 5.42, 5.41, 5.40, 5.39, 5.38, 5.37, 5.36, 5.35, 5.34, 5.33, 5.32, 5.31, 5.30, 5.29, 5.28, 5.27, 5.26, 5.25, 5.24, 5.23, 5.22, 5.21, 5.20, 5.19, 5.18, 5.17, 5.16, 5.15, 5.14, 5.13, 5.12, 5.11, 5.10, 5.09, 5.08, 5.07, 5.06, 5.05, 5.04, 5.03, 5.02, 5.01, 5.00, 4.99, 4.98, 4.97, 4.96, 4.95, 4.94, 4.93, 4.92, 4.91, 4.90, 4.89, 4.88, 4.87, 4.86, 4.85, 4.84, 4.83, 4.82, 4.81, 4.80, 4.79, 4.78, 4.77, 4.76, 4.75, 4.74, 4.73, 4.72, 4.71, 4.70, 4.69, 4.68, 4.67, 4.66, 4.65, 4.64, 4.63, 4.62, 4.61, 4.60, 4.59, 4.58, 4.57, 4.56, 4.55, 4.54, 4.53, 4.52, 4.51, 4.50, 4.49, 4.48, 4.47, 4.46, 4.45, 4.44, 4.43, 4.42, 4.41, 4.40, 4.39, 4.38, 4.37, 4.36, 4.35, 4.34, 4.33, 4.32, 4.31, 4.30, 4.29, 4.28, 4.27, 4.26, 4.25, 4.24, 4.23, 4.22, 4.21, 4.20, 4.19, 4.18, 4.17, 4.16, 4.15, 4.14, 4.13, 4.12, 4.11, 4.10, 4.09, 4.08, 4.07, 4.06, 4.05, 4.04, 4.03, 4.02, 4.01, 4.00, 3.99, 3.98, 3.97, 3.96, 3.95, 3.94, 3.93, 3.92, 3.91, 3.90, 3.89, 3.88, 3.87, 3.86, 3.85, 3.84, 3.83, 3.82, 3.81, 3.80, 3.79, 3.78, 3.77, 3.76, 3.75, 3.74, 3.73, 3.72, 3.71, 3.70, 3.69, 3.68, 3.67, 3.66, 3.65, 3.64, 3.63, 3.62, 3.61, 3.60, 3.59, 3.58, 3.57, 3.56, 3.55, 3.54, 3.53, 3.52, 3.51, 3.50, 3.49, 3.48, 3.47, 3.46, 3.45, 3.44, 3.43, 3.42, 3.41, 3.40, 3.39, 3.38, 3.37, 3.36, 3.35, 3.34, 3.33, 3.32, 3.31, 3.30, 3.29, 3.28, 3.27, 3.26, 3.25, 3.24, 3.23, 3.22, 3.21, 3.20, 3.19, 3.18, 3.17, 3.16, 3.15, 3.14, 3.13, 3.12, 3.11, 3.10, 3.09, 3.08, 3.07, 3.06, 3.05, 3.04, 3.03, 3.02, 3.01, 3.00, 2.99, 2.98, 2.97, 2.96, 2.95, 2.94, 2.93, 2.92, 2.91, 2.90, 2.89, 2.88, 2.87, 2.86, 2.85, 2.84, 2.83, 2.82, 2.81, 2.80, 2.79, 2.78, 2.77, 2.76, 2.75, 2.74, 2.73, 2.72, 2.71, 2.70, 2.69, 2.68, 2.67, 2.66, 2.65, 2.64, 2.63, 2.62, 2.61, 2.60, 2.59, 2.58, 2.57, 2.56, 2.55, 2.54, 2.53, 2.52, 2.51, 2.50, 2.49, 2.48, 2.47, 2.46, 2.45, 2.44, 2.43, 2.42, 2.41, 2.40, 2.39, 2.38, 2.37, 2.36, 2.35, 2.34, 2.33, 2.32, 2.31, 2.30, 2.29, 2.28, 2.27, 2.26, 2.25, 2.24, 2.23, 2.22, 2.21, 2.20, 2.19, 2.18, 2.17, 2.16, 2.15, 2.14, 2.13, 2.12, 2.11, 2.10, 2.09, 2.08, 2.07, 2.06, 2.05, 2.04, 2.03, 2.02, 2.01, 2.00, 1.99, 1.98, 1.97, 1.96, 1.95, 1.94, 1.93, 1.92, 1.91, 1.90, 1.89, 1.88, 1.87, 1.86, 1.85, 1.84, 1.83, 1.82, 1.81, 1.80, 1.79, 1.78, 1.77, 1.76, 1.75, 1.74, 1.73, 1.72, 1.71, 1.70, 1.69, 1.68, 1.67, 1.66, 1.65, 1.64, 1.63, 1.62, 1.61, 1.60, 1.59, 1.58, 1.57, 1.56, 1.55, 1.54, 1.53, 1.52, 1.51, 1.50, 1.49, 1.48, 1.47, 1.46, 1.45, 1.44, 1.43, 1.42, 1.41, 1.40, 1.39, 1.38, 1.37, 1.36, 1.35, 1.34, 1.33, 1.32, 1.31, 1.30, 1.29, 1.28, 1.27, 1.26, 1.25, 1.24, 1.23, 1.22, 1.21, 1.20, 1.19, 1.18, 1.17, 1.16, 1.15, 1.14, 1.13, 1.12, 1.11, 1.10, 1.09, 1.08, 1.07, 1.06, 1.05, 1.04, 1.03, 1.02, 1.01, 1.00, 0.99, 0.98, 0.97, 0.96, 0.95, 0.94, 0.93, 0.92, 0.91, 0.9

Compound **38** (CW18)

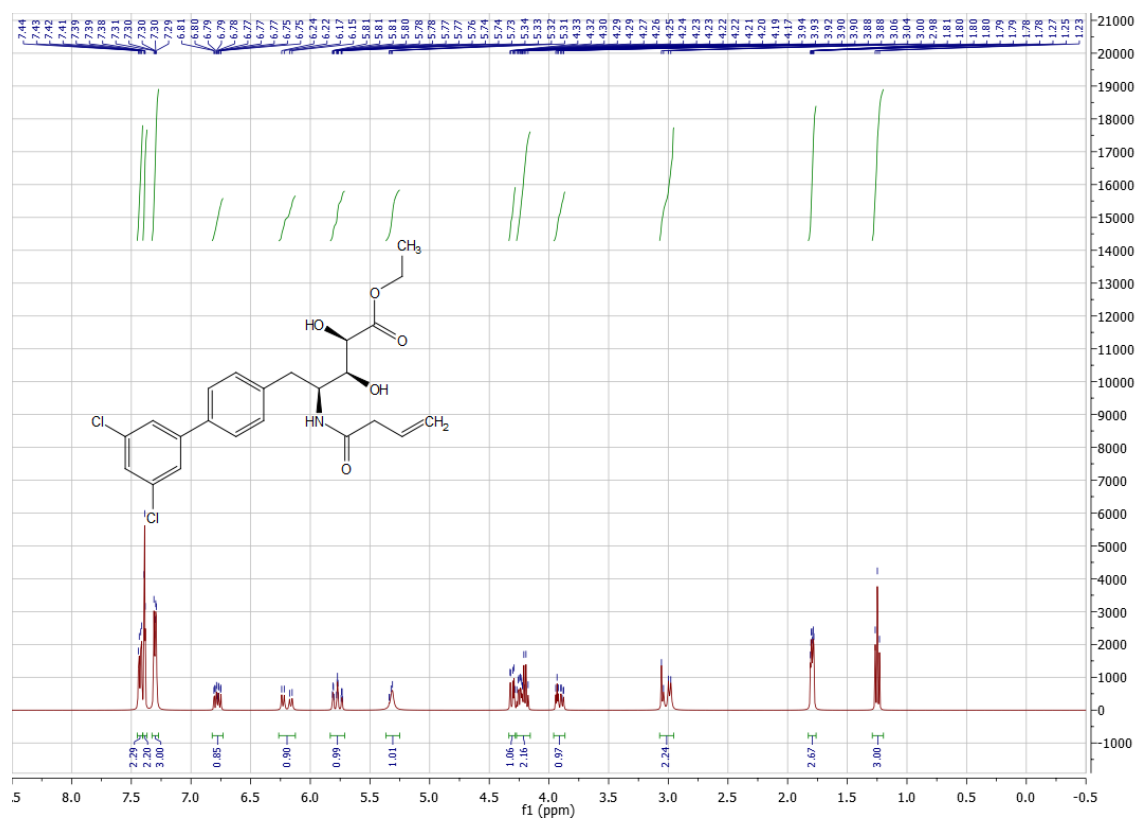

Compound **39** (CW19)

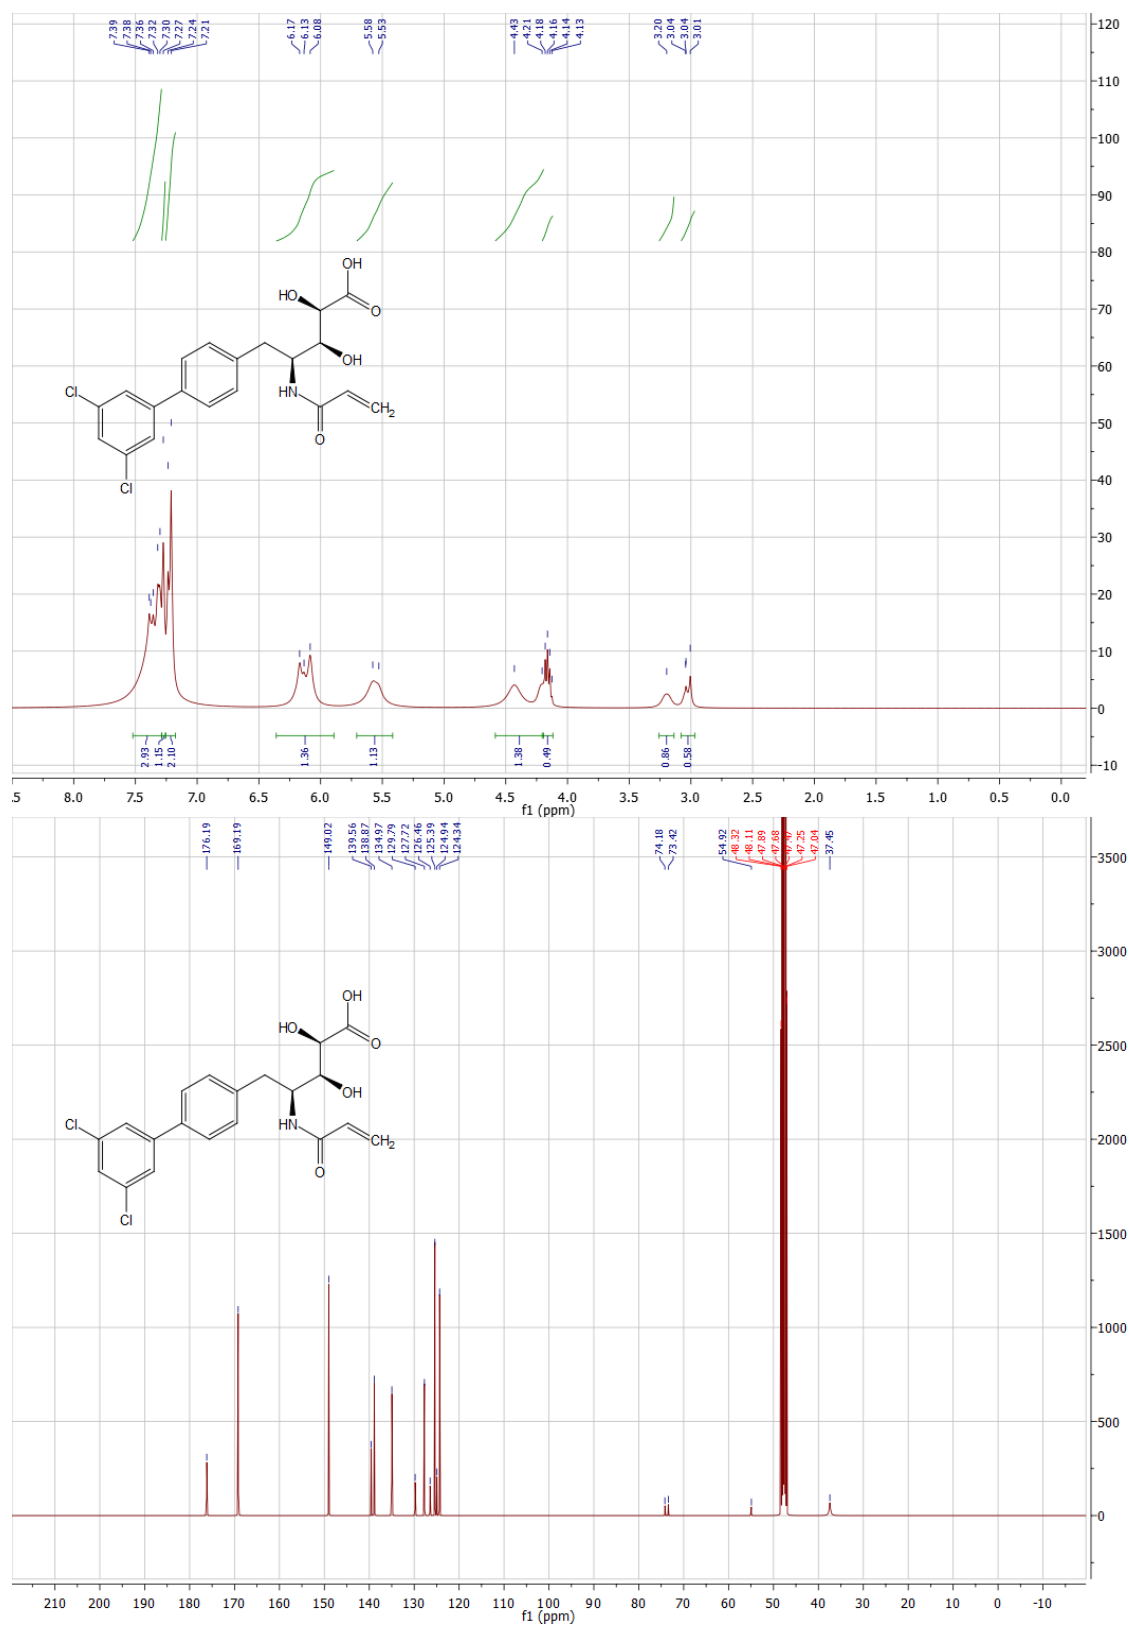

Compound **40** (CW20)

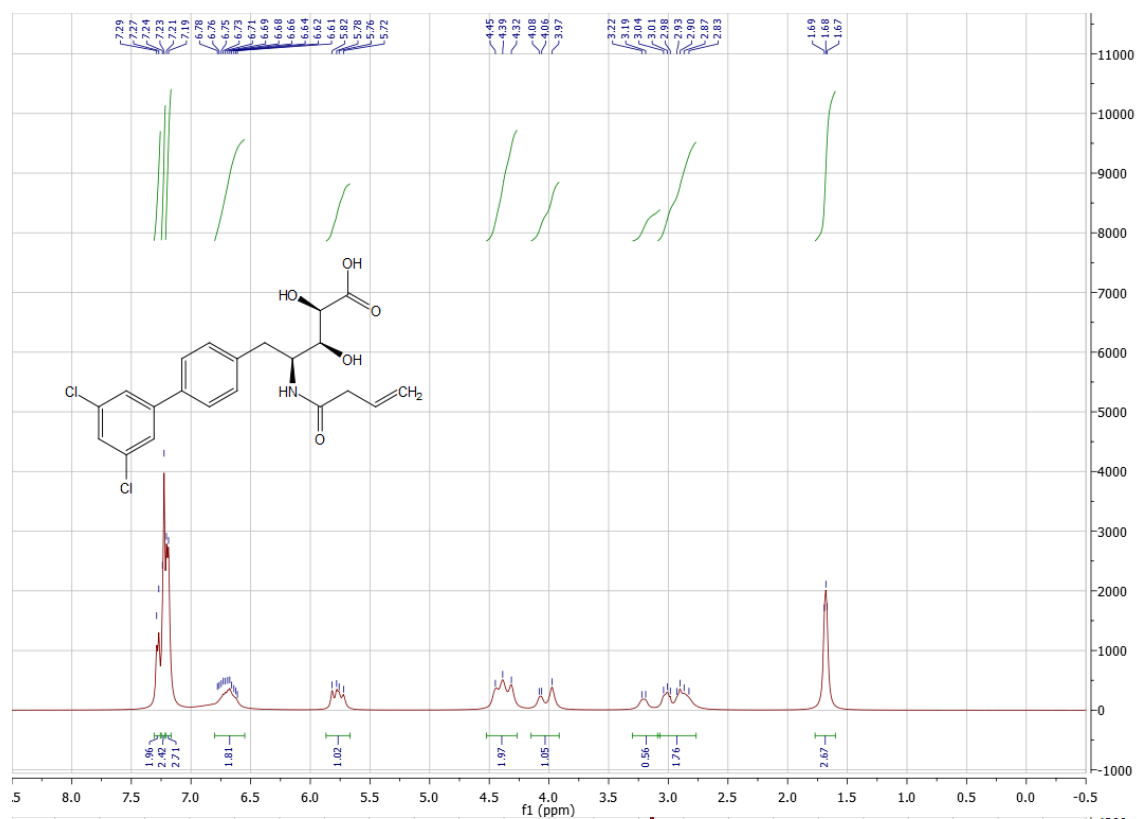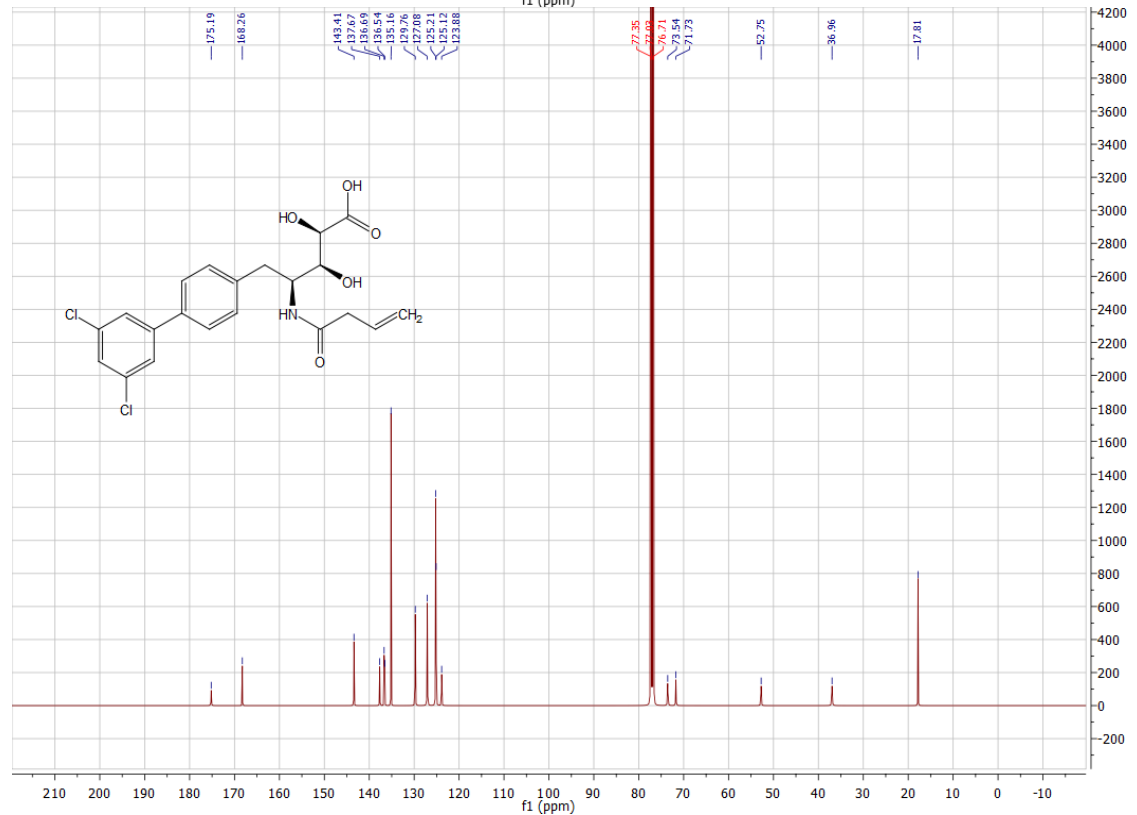

Supplement: c8md00320c1.pdf [file c8md00320c1.pdf]
